# Supplementary material for: Modeling transcriptional regulation using gene regulatory networks based on multi-omics data sources
Source: BMC Bioinformatics. 2021 Apr 19;22:200. doi: 10.1186/s12859-021-04126-3 (PMC8056605; doi:10.1186/s12859-021-04126-3)
Supplement: Supplementary file 2 — Additional file 2: Additional Supplemental File. This file contains additional supplementary information that is not directly relevant to the conclusions drawn in the paper, but should be interesting for the readers to look at. [file 12859_2021_4126_MOESM2_ESM.xlsx]

## Sheet: S1A
TF_Name	File accession	File format	Output type	Assembly	Biosample term name
ATF3	ENCFF002CGP	bed narrowPeak	optimal idr thresholded peaks	hg19	GM12878
MYC	ENCFF002DAI	bed narrowPeak	optimal idr thresholded peaks	hg19	GM12878
IRF3	ENCFF341HWZ	bed narrowPeak	optimal idr thresholded peaks	hg19	GM12878
IRF3	ENCFF976ZVG	bed narrowPeak	optimal idr thresholded peaks	hg19	GM12878
USF2	ENCFF002CPT	bed narrowPeak	optimal idr thresholded peaks	hg19	GM12878
USF2	ENCFF372DRC	bed narrowPeak	optimal idr thresholded peaks	hg19	GM12878
IKZF1	ENCFF229YSW	bed narrowPeak	optimal idr thresholded peaks	hg19	GM12878
TCF3	ENCFF002CIA	bed narrowPeak	optimal idr thresholded peaks	hg19	GM12878
RELA	ENCFF002CPA	bed narrowPeak	optimal idr thresholded peaks	hg19	GM12878
ZNF274	ENCFF002CPX	bed narrowPeak	optimal idr thresholded peaks	hg19	GM12878
PML	ENCFF002CHM	bed narrowPeak	optimal idr thresholded peaks	hg19	GM12878
FOS	ENCFF002COM	bed narrowPeak	optimal idr thresholded peaks	hg19	GM12878
CHD2	ENCFF002COO	bed narrowPeak	optimal idr thresholded peaks	hg19	GM12878
CHD2	ENCFF712GLE	bed narrowPeak	optimal idr thresholded peaks	hg19	GM12878
BACH1	ENCFF012JXJ	bed narrowPeak	optimal idr thresholded peaks	hg19	GM12878
MEF2C	ENCFF002CHD	bed narrowPeak	optimal idr thresholded peaks	hg19	GM12878
MEF2C	ENCFF261ZWR	bed narrowPeak	optimal idr thresholded peaks	hg19	GM12878
BATF	ENCFF002CGQ	bed narrowPeak	optimal idr thresholded peaks	hg19	GM12878
BATF	ENCFF593FBF	bed narrowPeak	optimal idr thresholded peaks	hg19	GM12878
GATAD2B	ENCFF456YII	bed narrowPeak	optimal idr thresholded peaks	hg19	GM12878
PAX5	ENCFF002CHK	bed narrowPeak	optimal idr thresholded peaks	hg19	GM12878
PAX5	ENCFF199FYD	bed narrowPeak	optimal idr thresholded peaks	hg19	GM12878
SMAD1	ENCFF632MBO	bed narrowPeak	optimal idr thresholded peaks	hg19	GM12878
SRF	ENCFF909FRA	bed narrowPeak	optimal idr thresholded peaks	hg19	GM12878
BHLHE40	ENCFF002COK	bed narrowPeak	optimal idr thresholded peaks	hg19	GM12878
BHLHE40	ENCFF853SOB	bed narrowPeak	optimal idr thresholded peaks	hg19	GM12878
ZBTB33	ENCFF002CID	bed narrowPeak	optimal idr thresholded peaks	hg19	GM12878
ZBTB33	ENCFF394CWJ	bed narrowPeak	optimal idr thresholded peaks	hg19	GM12878
SIN3A	ENCFF002CPM	bed narrowPeak	optimal idr thresholded peaks	hg19	GM12878
SIN3A	ENCFF778DJD	bed narrowPeak	optimal idr thresholded peaks	hg19	GM12878
NFIC	ENCFF002CHG	bed narrowPeak	optimal idr thresholded peaks	hg19	GM12878
NFIC	ENCFF628QJU	bed narrowPeak	optimal idr thresholded peaks	hg19	GM12878
ZNF143	ENCFF002CPW	bed narrowPeak	optimal idr thresholded peaks	hg19	GM12878
ZNF143	ENCFF141SAU	bed narrowPeak	optimal idr thresholded peaks	hg19	GM12878
UBTF	ENCFF298UPI	bed narrowPeak	optimal idr thresholded peaks	hg19	GM12878
UBTF	ENCFF745TNJ	bed narrowPeak	optimal idr thresholded peaks	hg19	GM12878
IKZF2	ENCFF339FFC	bed narrowPeak	optimal idr thresholded peaks	hg19	GM12878
NR2C2	ENCFF002CPS	bed narrowPeak	optimal idr thresholded peaks	hg19	GM12878
NR2C2	ENCFF721FTG	bed narrowPeak	optimal idr thresholded peaks	hg19	GM12878
STAT1	ENCFF002CPO	bed narrowPeak	optimal idr thresholded peaks	hg19	GM12878
TAF1	ENCFF002CHY	bed narrowPeak	optimal idr thresholded peaks	hg19	GM12878
TAF1	ENCFF544NRC	bed narrowPeak	optimal idr thresholded peaks	hg19	GM12878
ZFP36	ENCFF144FCI	bed narrowPeak	optimal idr thresholded peaks	hg19	GM12878
EP300	ENCFF002CHI	bed narrowPeak	optimal idr thresholded peaks	hg19	GM12878
EP300	ENCFF302XID	bed narrowPeak	optimal idr thresholded peaks	hg19	GM12878
JUND	ENCFF002COV	bed narrowPeak	optimal idr thresholded peaks	hg19	GM12878
TCF7	ENCFF305ICK	bed narrowPeak	optimal idr thresholded peaks	hg19	GM12878
STAT5A	ENCFF002CHX	bed narrowPeak	optimal idr thresholded peaks	hg19	GM12878
STAT5A	ENCFF492YMU	bed narrowPeak	optimal idr thresholded peaks	hg19	GM12878
PAX5	ENCFF002CHJ	bed narrowPeak	optimal idr thresholded peaks	hg19	GM12878
PAX5	ENCFF339KUO	bed narrowPeak	optimal idr thresholded peaks	hg19	GM12878
ZNF143	ENCFF544NXC	bed narrowPeak	optimal idr thresholded peaks	hg19	GM12878
BCLAF1	ENCFF002CGT	bed narrowPeak	optimal idr thresholded peaks	hg19	GM12878
BCLAF1	ENCFF563QBC	bed narrowPeak	optimal idr thresholded peaks	hg19	GM12878
SIX5	ENCFF002CHU	bed narrowPeak	optimal idr thresholded peaks	hg19	GM12878
SIX5	ENCFF606WUV	bed narrowPeak	optimal idr thresholded peaks	hg19	GM12878
KDM1A	ENCFF996RRT	bed narrowPeak	optimal idr thresholded peaks	hg19	GM12878
E2F4	ENCFF002COR	bed narrowPeak	optimal idr thresholded peaks	hg19	GM12878
E2F4	ENCFF433PFN	bed narrowPeak	optimal idr thresholded peaks	hg19	GM12878
GABPA	ENCFF116EXQ	bed narrowPeak	optimal idr thresholded peaks	hg19	GM12878
POU2F2	ENCFF002CHP	bed narrowPeak	optimal idr thresholded peaks	hg19	GM12878
YY1	ENCFF002CIC	bed narrowPeak	optimal idr thresholded peaks	hg19	GM12878
YY1	ENCFF967ACD	bed narrowPeak	optimal idr thresholded peaks	hg19	GM12878
ZBTB40	ENCFF357WYN	bed narrowPeak	optimal idr thresholded peaks	hg19	GM12878
NR2F1	ENCFF810CEL	bed narrowPeak	optimal idr thresholded peaks	hg19	GM12878
SRF	ENCFF030NYG	bed narrowPeak	optimal idr thresholded peaks	hg19	GM12878
EED	ENCFF242VUO	bed narrowPeak	optimal idr thresholded peaks	hg19	GM12878
ZNF24	ENCFF103OOV	bed narrowPeak	optimal idr thresholded peaks	hg19	GM12878
ZNF207	ENCFF273BVT	bed narrowPeak	optimal idr thresholded peaks	hg19	GM12878
MTA3	ENCFF002CHE	bed narrowPeak	optimal idr thresholded peaks	hg19	GM12878
MTA3	ENCFF413VUC	bed narrowPeak	optimal idr thresholded peaks	hg19	GM12878
TRIM22	ENCFF241GZK	bed narrowPeak	optimal idr thresholded peaks	hg19	GM12878
TRIM22	ENCFF735XQT	bed narrowPeak	optimal idr thresholded peaks	hg19	GM12878
CREM	ENCFF534CKB	bed narrowPeak	optimal idr thresholded peaks	hg19	GM12878
RCOR1	ENCFF002COP	bed narrowPeak	optimal idr thresholded peaks	hg19	GM12878
RCOR1	ENCFF898MUV	bed narrowPeak	optimal idr thresholded peaks	hg19	GM12878
PKNOX1	ENCFF020GMZ	bed narrowPeak	optimal idr thresholded peaks	hg19	GM12878
RAD51	ENCFF445UJF	bed narrowPeak	optimal idr thresholded peaks	hg19	GM12878
ETV6	ENCFF516AJC	bed narrowPeak	optimal idr thresholded peaks	hg19	GM12878
ETV6	ENCFF304WER	bed narrowPeak	optimal idr thresholded peaks	hg19	GM12878
FOXK2	ENCFF980KSV	bed narrowPeak	optimal idr thresholded peaks	hg19	GM12878
GABPA	ENCFF002CHA	bed narrowPeak	optimal idr thresholded peaks	hg19	GM12878
GABPA	ENCFF617GBZ	bed narrowPeak	optimal idr thresholded peaks	hg19	GM12878
ZBTB33	ENCFF539CKD	bed narrowPeak	optimal idr thresholded peaks	hg19	GM12878
TCF12	ENCFF017LZE	bed narrowPeak	optimal idr thresholded peaks	hg19	GM12878
BCL3	ENCFF002CGS	bed narrowPeak	optimal idr thresholded peaks	hg19	GM12878
BCL3	ENCFF625SHY	bed narrowPeak	optimal idr thresholded peaks	hg19	GM12878
REST	ENCFF002CHH	bed narrowPeak	optimal idr thresholded peaks	hg19	GM12878
REST	ENCFF677KJB	bed narrowPeak	optimal idr thresholded peaks	hg19	GM12878
SKIL	ENCFF142EVF	bed narrowPeak	optimal idr thresholded peaks	hg19	GM12878
CEBPZ	ENCFF920HDC	bed narrowPeak	optimal idr thresholded peaks	hg19	GM12878
HDGF	ENCFF935HIG	bed narrowPeak	optimal idr thresholded peaks	hg19	GM12878
HSF1	ENCFF308ZGG	bed narrowPeak	optimal idr thresholded peaks	hg19	GM12878
PBX3	ENCFF002CHL	bed narrowPeak	optimal idr thresholded peaks	hg19	GM12878
PBX3	ENCFF717IXP	bed narrowPeak	optimal idr thresholded peaks	hg19	GM12878
CBFB	ENCFF788LSH	bed narrowPeak	optimal idr thresholded peaks	hg19	GM12878
EGR1	ENCFF002CGW	bed narrowPeak	optimal idr thresholded peaks	hg19	GM12878
BCLAF1	ENCFF015YHT	bed narrowPeak	optimal idr thresholded peaks	hg19	GM12878
CBX3	ENCFF141LEI	bed narrowPeak	optimal idr thresholded peaks	hg19	GM12878
CHD1	ENCFF002CON	bed narrowPeak	optimal idr thresholded peaks	hg19	GM12878
CHD1	ENCFF273ULT	bed narrowPeak	optimal idr thresholded peaks	hg19	GM12878
STAT3	ENCFF002CPP	bed narrowPeak	optimal idr thresholded peaks	hg19	GM12878
STAT3	ENCFF014RBU	bed narrowPeak	optimal idr thresholded peaks	hg19	GM12878
IRF5	ENCFF100ERQ	bed narrowPeak	optimal idr thresholded peaks	hg19	GM12878
KDM5A	ENCFF070LPO	bed narrowPeak	optimal idr thresholded peaks	hg19	GM12878
ATF7	ENCFF726VEK	bed narrowPeak	optimal idr thresholded peaks	hg19	GM12878
IKZF1	ENCFF809OOE	bed narrowPeak	optimal idr thresholded peaks	hg19	GM12878
SMARCA5	ENCFF478DRD	bed narrowPeak	optimal idr thresholded peaks	hg19	GM12878
IKZF2	ENCFF653MIQ	bed narrowPeak	optimal idr thresholded peaks	hg19	GM12878
NFATC1	ENCFF002CHF	bed narrowPeak	optimal idr thresholded peaks	hg19	GM12878
NFATC1	ENCFF409QJU	bed narrowPeak	optimal idr thresholded peaks	hg19	GM12878
ZZZ3	ENCFF002CPY	bed narrowPeak	optimal idr thresholded peaks	hg19	GM12878
ZZZ3	ENCFF310XJC	bed narrowPeak	optimal idr thresholded peaks	hg19	GM12878
CEBPB	ENCFF002CGU	bed narrowPeak	optimal idr thresholded peaks	hg19	GM12878
MEF2A	ENCFF002CHC	bed narrowPeak	optimal idr thresholded peaks	hg19	GM12878
MEF2A	ENCFF328QLX	bed narrowPeak	optimal idr thresholded peaks	hg19	GM12878
ZSCAN29	ENCFF455HXN	bed narrowPeak	optimal idr thresholded peaks	hg19	GM12878
SRF	ENCFF002CHW	bed narrowPeak	optimal idr thresholded peaks	hg19	GM12878
SRF	ENCFF199WGD	bed narrowPeak	optimal idr thresholded peaks	hg19	GM12878
MXI1	ENCFF002COY	bed narrowPeak	optimal idr thresholded peaks	hg19	GM12878
MXI1	ENCFF079ZWK	bed narrowPeak	optimal idr thresholded peaks	hg19	GM12878
ZNF217	ENCFF513RIQ	bed narrowPeak	optimal idr thresholded peaks	hg19	GM12878
ZNF687	ENCFF643OWO	bed narrowPeak	optimal idr thresholded peaks	hg19	GM12878
CTCF	ENCFF002DAJ	bed narrowPeak	optimal idr thresholded peaks	hg19	GM12878
ZNF622	ENCFF065QOM	bed narrowPeak	optimal idr thresholded peaks	hg19	GM12878
ARNT	ENCFF166OZW	bed narrowPeak	optimal idr thresholded peaks	hg19	GM12878
NFXL1	ENCFF166FRO	bed narrowPeak	optimal idr thresholded peaks	hg19	GM12878
CBX5	ENCFF420YHY	bed narrowPeak	optimal idr thresholded peaks	hg19	GM12878
RFX5	ENCFF002CPL	bed narrowPeak	optimal idr thresholded peaks	hg19	GM12878
RFX5	ENCFF402FYF	bed narrowPeak	optimal idr thresholded peaks	hg19	GM12878
KLF5	ENCFF827ZLB	bed narrowPeak	optimal idr thresholded peaks	hg19	GM12878
HCFC1	ENCFF208TRU	bed narrowPeak	optimal idr thresholded peaks	hg19	GM12878
HCFC1	ENCFF895YBG	bed narrowPeak	optimal idr thresholded peaks	hg19	GM12878
TCF12	ENCFF002CHZ	bed narrowPeak	optimal idr thresholded peaks	hg19	GM12878
TCF12	ENCFF160WLU	bed narrowPeak	optimal idr thresholded peaks	hg19	GM12878
REST	ENCFF048JKT	bed narrowPeak	optimal idr thresholded peaks	hg19	GM12878
POLR3G	ENCFF002CPJ	bed narrowPeak	optimal idr thresholded peaks	hg19	GM12878
NFYB	ENCFF002CPC	bed narrowPeak	optimal idr thresholded peaks	hg19	GM12878
NFYB	ENCFF467NRS	bed narrowPeak	optimal idr thresholded peaks	hg19	GM12878
TBL1XR1	ENCFF002CPQ	bed narrowPeak	optimal idr thresholded peaks	hg19	GM12878
TBL1XR1	ENCFF957YRU	bed narrowPeak	optimal idr thresholded peaks	hg19	GM12878
ARID3A	ENCFF027VZK	bed narrowPeak	optimal idr thresholded peaks	hg19	GM12878
CTCF	ENCFF002CDP	bed narrowPeak	optimal idr thresholded peaks	hg19	GM12878
CTCF	ENCFF833FTF	bed narrowPeak	optimal idr thresholded peaks	hg19	GM12878
NBN	ENCFF055NJR	bed narrowPeak	optimal idr thresholded peaks	hg19	GM12878
EBF1	ENCFF002COS	bed narrowPeak	optimal idr thresholded peaks	hg19	GM12878
EBF1	ENCFF868VSY	bed narrowPeak	optimal idr thresholded peaks	hg19	GM12878
MEF2B	ENCFF911BYP	bed narrowPeak	optimal idr thresholded peaks	hg19	GM12878
ZBED1	ENCFF123WEZ	bed narrowPeak	optimal idr thresholded peaks	hg19	GM12878
IRF4	ENCFF002CHB	bed narrowPeak	optimal idr thresholded peaks	hg19	GM12878
IRF4	ENCFF391DVL	bed narrowPeak	optimal idr thresholded peaks	hg19	GM12878
E2F8	ENCFF063WXY	bed narrowPeak	optimal idr thresholded peaks	hg19	GM12878
SP1	ENCFF002CHV	bed narrowPeak	optimal idr thresholded peaks	hg19	GM12878
PAX8	ENCFF455YHJ	bed narrowPeak	optimal idr thresholded peaks	hg19	GM12878
ZNF592	ENCFF566YUW	bed narrowPeak	optimal idr thresholded peaks	hg19	GM12878
ELF1	ENCFF807AKG	bed narrowPeak	optimal idr thresholded peaks	hg19	GM12878
ETV6	ENCFF760IFZ	bed narrowPeak	optimal idr thresholded peaks	hg19	GM12878
ETV6	ENCFF692GBM	bed narrowPeak	optimal idr thresholded peaks	hg19	GM12878
MYB	ENCFF215YWS	bed narrowPeak	optimal idr thresholded peaks	hg19	GM12878
MYB	ENCFF103IOJ	bed narrowPeak	optimal idr thresholded peaks	hg19	GM12878
ATF2	ENCFF002CGO	bed narrowPeak	optimal idr thresholded peaks	hg19	GM12878
ATF2	ENCFF609KOY	bed narrowPeak	optimal idr thresholded peaks	hg19	GM12878
RXRA	ENCFF002CHT	bed narrowPeak	optimal idr thresholded peaks	hg19	GM12878
RXRA	ENCFF461FGJ	bed narrowPeak	optimal idr thresholded peaks	hg19	GM12878
EP300	ENCFF002CPF	bed narrowPeak	optimal idr thresholded peaks	hg19	GM12878
EP300	ENCFF462GHD	bed narrowPeak	optimal idr thresholded peaks	hg19	GM12878
IKZF1	ENCFF002COU	bed narrowPeak	optimal idr thresholded peaks	hg19	GM12878
IKZF1	ENCFF073XZC	bed narrowPeak	optimal idr thresholded peaks	hg19	GM12878
JUNB	ENCFF939TZS	bed narrowPeak	optimal idr thresholded peaks	hg19	GM12878
BHLHE40	ENCFF095GMM	bed narrowPeak	optimal idr thresholded peaks	hg19	GM12878
SPI1	ENCFF002CHQ	bed narrowPeak	optimal idr thresholded peaks	hg19	GM12878
MAX	ENCFF002COW	bed narrowPeak	optimal idr thresholded peaks	hg19	GM12878
MAX	ENCFF083KVY	bed narrowPeak	optimal idr thresholded peaks	hg19	GM12878
CTCF	ENCFF002DCM	bed narrowPeak	optimal idr thresholded peaks	hg19	GM12878
CTCF	ENCFF473RXY	bed narrowPeak	optimal idr thresholded peaks	hg19	GM12878
FOXM1	ENCFF002CGZ	bed narrowPeak	optimal idr thresholded peaks	hg19	GM12878
NFATC3	ENCFF704ZYN	bed narrowPeak	optimal idr thresholded peaks	hg19	GM12878
YBX1	ENCFF344OJI	bed narrowPeak	optimal idr thresholded peaks	hg19	GM12878
BRCA1	ENCFF002COL	bed narrowPeak	optimal idr thresholded peaks	hg19	GM12878
BRCA1	ENCFF082JDH	bed narrowPeak	optimal idr thresholded peaks	hg19	GM12878
USF1	ENCFF002CIB	bed narrowPeak	optimal idr thresholded peaks	hg19	GM12878
USF1	ENCFF805GKD	bed narrowPeak	optimal idr thresholded peaks	hg19	GM12878
STAT1	ENCFF817QHW	bed narrowPeak	optimal idr thresholded peaks	hg19	GM12878
STAT1	ENCFF557HJB	bed narrowPeak	optimal idr thresholded peaks	hg19	GM12878
TBX21	ENCFF405NFV	bed narrowPeak	optimal idr thresholded peaks	hg19	GM12878
NRF1	ENCFF002CPD	bed narrowPeak	optimal idr thresholded peaks	hg19	GM12878
NRF1	ENCFF931XAL	bed narrowPeak	optimal idr thresholded peaks	hg19	GM12878
CHD4	ENCFF499ZPP	bed narrowPeak	optimal idr thresholded peaks	hg19	GM12878
BCL11A	ENCFF002CGR	bed narrowPeak	optimal idr thresholded peaks	hg19	GM12878
BCL11A	ENCFF468MFY	bed narrowPeak	optimal idr thresholded peaks	hg19	GM12878
ELK1	ENCFF002COT	bed narrowPeak	optimal idr thresholded peaks	hg19	GM12878
ELK1	ENCFF556JBS	bed narrowPeak	optimal idr thresholded peaks	hg19	GM12878
RB1	ENCFF601XVA	bed narrowPeak	optimal idr thresholded peaks	hg19	GM12878
ZEB1	ENCFF002CIE	bed narrowPeak	optimal idr thresholded peaks	hg19	GM12878
ZEB1	ENCFF997NGJ	bed narrowPeak	optimal idr thresholded peaks	hg19	GM12878
TBP	ENCFF002CPR	bed narrowPeak	optimal idr thresholded peaks	hg19	GM12878
TBP	ENCFF490VYC	bed narrowPeak	optimal idr thresholded peaks	hg19	GM12878
HDAC2	ENCFF107UHX	bed narrowPeak	optimal idr thresholded peaks	hg19	GM12878
CUX1	ENCFF721SDD	bed narrowPeak	optimal idr thresholded peaks	hg19	GM12878
ETS1	ENCFF002CGY	bed narrowPeak	optimal idr thresholded peaks	hg19	GM12878
ETS1	ENCFF332PGQ	bed narrowPeak	optimal idr thresholded peaks	hg19	GM12878
EP300	ENCFF002CPE	bed narrowPeak	optimal idr thresholded peaks	hg19	GM12878
EP300	ENCFF222XPQ	bed narrowPeak	optimal idr thresholded peaks	hg19	GM12878
EZH2	ENCFF002CDQ	bed narrowPeak	optimal idr thresholded peaks	hg19	GM12878
EZH2	ENCFF678JII	bed narrowPeak	optimal idr thresholded peaks	hg19	GM12878
MTA2	ENCFF966RPL	bed narrowPeak	optimal idr thresholded peaks	hg19	GM12878
ATF2	ENCFF127GYQ	bed narrowPeak	optimal idr thresholded peaks	hg19	GM12878
RUNX3	ENCFF002CHS	bed narrowPeak	optimal idr thresholded peaks	hg19	GM12878
RUNX3	ENCFF248QFF	bed narrowPeak	optimal idr thresholded peaks	hg19	GM12878
YY1	ENCFF002CPV	bed narrowPeak	optimal idr thresholded peaks	hg19	GM12878
SMAD5	ENCFF134XDY	bed narrowPeak	optimal idr thresholded peaks	hg19	GM12878
SMAD5	ENCFF711TMS	bed narrowPeak	optimal idr thresholded peaks	hg19	GM12878
RELB	ENCFF456FQB	bed narrowPeak	optimal idr thresholded peaks	hg19	GM12878
TARDBP	ENCFF733UTZ	bed narrowPeak	optimal idr thresholded peaks	hg19	GM12878
ESRRA	ENCFF195PBG	bed narrowPeak	optimal idr thresholded peaks	hg19	GM12878
MAZ	ENCFF002COX	bed narrowPeak	optimal idr thresholded peaks	hg19	GM12878
MAZ	ENCFF066XDW	bed narrowPeak	optimal idr thresholded peaks	hg19	GM12878
NFYA	ENCFF002CPB	bed narrowPeak	optimal idr thresholded peaks	hg19	GM12878
NFYA	ENCFF414JLN	bed narrowPeak	optimal idr thresholded peaks	hg19	GM12878
ASH2L	ENCFF917CXD	bed narrowPeak	optimal idr thresholded peaks	hg19	GM12878
MAFK	ENCFF689AXJ	bed narrowPeak	optimal idr thresholded peaks	hg19	GM12878
TRIM22	ENCFF899JBI	bed narrowPeak	optimal idr thresholded peaks	hg19	GM12878
EBF1	ENCFF002CGV	bed narrowPeak	optimal idr thresholded peaks	hg19	GM12878
EBF1	ENCFF394DLH	bed narrowPeak	optimal idr thresholded peaks	hg19	GM12878
JUND	ENCFF556PIY	bed narrowPeak	optimal idr thresholded peaks	hg19	GM12878
E4F1	ENCFF711OSR	bed narrowPeak	optimal idr thresholded peaks	hg19	GM12878
BMI1	ENCFF809PXE	bed narrowPeak	optimal idr thresholded peaks	hg19	GM12878
WRNIP1	ENCFF002CPU	bed narrowPeak	optimal idr thresholded peaks	hg19	GM12878
WRNIP1	ENCFF277VDY	bed narrowPeak	optimal idr thresholded peaks	hg19	GM12878
MLLT1	ENCFF881VZH	bed narrowPeak	optimal idr thresholded peaks	hg19	GM12878
NR2C1	ENCFF381SBC	bed narrowPeak	optimal idr thresholded peaks	hg19	GM12878
RAD21	ENCFF002CPK	bed narrowPeak	optimal idr thresholded peaks	hg19	GM12878
RAD21	ENCFF002CHR	bed narrowPeak	optimal idr thresholded peaks	hg19	GM12878
RAD21	ENCFF753RGL	bed narrowPeak	optimal idr thresholded peaks	hg19	GM12878
DPF2	ENCFF349MPF	bed narrowPeak	optimal idr thresholded peaks	hg19	GM12878
IRF3	ENCFF303TVZ	bed narrowPeak	optimal idr thresholded peaks	hg19	GM12878
SMC3	ENCFF002CPN	bed narrowPeak	optimal idr thresholded peaks	hg19	GM12878
SMC3	ENCFF686FLD	bed narrowPeak	optimal idr thresholded peaks	hg19	GM12878
RBBP5	ENCFF814CZI	bed narrowPeak	optimal idr thresholded peaks	hg19	GM12878
CEBPB	ENCFF761MGJ	bed narrowPeak	optimal idr thresholded peaks	hg19	GM12878
NFE2	ENCFF002COZ	bed narrowPeak	optimal idr thresholded peaks	hg19	GM12878
NFE2	ENCFF766ERZ	bed narrowPeak	optimal idr thresholded peaks	hg19	GM12878
ZNF384	ENCFF371OGO	bed narrowPeak	optimal idr thresholded peaks	hg19	GM12878
CTCF	ENCFF002COQ	bed narrowPeak	optimal idr thresholded peaks	hg19	GM12878
CTCF	ENCFF710VEH	bed narrowPeak	optimal idr thresholded peaks	hg19	GM12878
TARDBP	ENCFF374HJR	bed narrowPeak	optimal idr thresholded peaks	hg19	GM12878
ELF1	ENCFF002CGX	bed narrowPeak	optimal idr thresholded peaks	hg19	GM12878
CREB1	ENCFF001TWP	bed narrowPeak	optimal idr thresholded peaks	hg19	GM12878
CREB1	ENCFF001TWQ	bed narrowPeak	optimal idr thresholded peaks	hg19	GM12878
SREBF2	ENCFF001VFK	bed narrowPeak	optimal idr thresholded peaks	hg19	GM12878
SREBF1	ENCFF001VFJ	bed narrowPeak	optimal idr thresholded peaks	hg19	GM12878
HDAC6	ENCFF109YBE	bed narrowPeak	optimal idr thresholded peaks	hg19	GM12878
SUZ12	ENCFF746JPU	bed narrowPeak	optimal idr thresholded peaks	hg19	GM12878

## Sheet: S1B
TF_Name	File accession	File format	Output type	Assembly	Biosample term name
SMAD2	ENCFF011KRN	bed narrowPeak	optimal IDR thresholded peaks	hg19	K562
SMAD2	ENCFF870PWV	bed narrowPeak	optimal IDR thresholded peaks	hg19	K562
TCF7	ENCFF249EZR	bed narrowPeak	optimal IDR thresholded peaks	hg19	K562
ELF4	ENCFF502KHR	bed narrowPeak	optimal IDR thresholded peaks	hg19	K562
SMAD1	ENCFF315YAF	bed narrowPeak	optimal IDR thresholded peaks	hg19	K562
eGFP-NFE2L1	ENCFF175IUO	bed narrowPeak	optimal IDR thresholded peaks	hg19	K562
ASH1L	ENCFF235ZZP	bed narrowPeak	optimal IDR thresholded peaks	hg19	K562
IRF2	ENCFF384YDT	bed narrowPeak	optimal IDR thresholded peaks	hg19	K562
IRF2	ENCFF231TGQ	bed narrowPeak	optimal IDR thresholded peaks	hg19	K562
eGFP-ZNF197	ENCFF853TZC	bed narrowPeak	optimal IDR thresholded peaks	hg19	K562
CREB3L1	ENCFF582YPB	bed narrowPeak	optimal IDR thresholded peaks	hg19	K562
CREB3L1	ENCFF708GFU	bed narrowPeak	optimal IDR thresholded peaks	hg19	K562
HDGF	ENCFF561WNI	bed narrowPeak	optimal IDR thresholded peaks	hg19	K562
eGFP-ETV1	ENCFF404YMX	bed narrowPeak	optimal IDR thresholded peaks	hg19	K562
eGFP-TSC22D4	ENCFF036YVI	bed narrowPeak	optimal IDR thresholded peaks	hg19	K562
eGFP-GABPA	ENCFF685KAG	bed narrowPeak	optimal IDR thresholded peaks	hg19	K562
eGFP-TAF7	ENCFF411DIA	bed narrowPeak	optimal IDR thresholded peaks	hg19	K562
NONO	ENCFF776YPS	bed narrowPeak	optimal IDR thresholded peaks	hg19	K562
eGFP-TEAD2	ENCFF619BDC	bed narrowPeak	optimal IDR thresholded peaks	hg19	K562
MBD2	ENCFF470MLY	bed narrowPeak	optimal IDR thresholded peaks	hg19	K562
ZNF24	ENCFF238MYM	bed narrowPeak	optimal IDR thresholded peaks	hg19	K562
MTA2	ENCFF410EDG	bed narrowPeak	optimal IDR thresholded peaks	hg19	K562
HDAC2	ENCFF490VVG	bed narrowPeak	optimal IDR thresholded peaks	hg19	K562
DDX20	ENCFF338HQY	bed narrowPeak	optimal IDR thresholded peaks	hg19	K562
eGFP-ZBTB40	ENCFF995IAC	bed narrowPeak	optimal IDR thresholded peaks	hg19	K562
NCOA4	ENCFF495CSO	bed narrowPeak	optimal IDR thresholded peaks	hg19	K562
ARID2	ENCFF332ICQ	bed narrowPeak	optimal IDR thresholded peaks	hg19	K562
ATF7	ENCFF868QLL	bed narrowPeak	optimal IDR thresholded peaks	hg19	K562
eGFP-RELA	ENCFF580QGA	bed narrowPeak	optimal IDR thresholded peaks	hg19	K562
eGFP-KLF1	ENCFF717TWA	bed narrowPeak	optimal IDR thresholded peaks	hg19	K562
eGFP-ILK	ENCFF176NOI	bed narrowPeak	optimal IDR thresholded peaks	hg19	K562
ATF2	ENCFF968KBN	bed narrowPeak	optimal IDR thresholded peaks	hg19	K562
eGFP-ELF1	ENCFF526EEI	bed narrowPeak	optimal IDR thresholded peaks	hg19	K562
KLF16	ENCFF844HBQ	bed narrowPeak	optimal IDR thresholded peaks	hg19	K562
SNIP1	ENCFF494ZUY	bed narrowPeak	optimal IDR thresholded peaks	hg19	K562
ZBED1	ENCFF253FON	bed narrowPeak	optimal IDR thresholded peaks	hg19	K562
MLLT1	ENCFF440JJW	bed narrowPeak	optimal IDR thresholded peaks	hg19	K562
MLLT1	ENCFF197OGH	bed narrowPeak	optimal IDR thresholded peaks	hg19	K562
eGFP-ZNF639	ENCFF120WOF	bed narrowPeak	optimal IDR thresholded peaks	hg19	K562
NEUROD1	ENCFF581YKY	bed narrowPeak	optimal IDR thresholded peaks	hg19	K562
eGFP-PTTG1	ENCFF332DRG	bed narrowPeak	optimal IDR thresholded peaks	hg19	K562
eGFP-ZNF83	ENCFF654BMD	bed narrowPeak	optimal IDR thresholded peaks	hg19	K562
PYGO2	ENCFF421KIV	bed narrowPeak	optimal IDR thresholded peaks	hg19	K562
eGFP-ZNF589	ENCFF602AXP	bed narrowPeak	optimal IDR thresholded peaks	hg19	K562
CBX5	ENCFF062ARS	bed narrowPeak	optimal IDR thresholded peaks	hg19	K562
eGFP-NR4A1	ENCFF859NPS	bed narrowPeak	optimal IDR thresholded peaks	hg19	K562
SP1	ENCFF058NMZ	bed narrowPeak	optimal IDR thresholded peaks	hg19	K562
SP1	ENCFF300XUA	bed narrowPeak	optimal IDR thresholded peaks	hg19	K562
eGFP-NR2C2	ENCFF254YOX	bed narrowPeak	optimal IDR thresholded peaks	hg19	K562
MEIS2	ENCFF613RNG	bed narrowPeak	optimal IDR thresholded peaks	hg19	K562
eGFP-IRF1	ENCFF388AJH	bed narrowPeak	optimal IDR thresholded peaks	hg19	K562
MNT	ENCFF059ONJ	bed narrowPeak	optimal IDR thresholded peaks	hg19	K562
ILF3	ENCFF415YPX	bed narrowPeak	optimal IDR thresholded peaks	hg19	K562
eGFP-ETS2	ENCFF772HOY	bed narrowPeak	optimal IDR thresholded peaks	hg19	K562
eGFP-IRF9	ENCFF196DHR	bed narrowPeak	optimal IDR thresholded peaks	hg19	K562
eGFP-FOSL1	ENCFF692PVV	bed narrowPeak	optimal IDR thresholded peaks	hg19	K562
CREM	ENCFF948TXN	bed narrowPeak	optimal IDR thresholded peaks	hg19	K562
ATF4	ENCFF710IEF	bed narrowPeak	optimal IDR thresholded peaks	hg19	K562
NCOA1	ENCFF967IKR	bed narrowPeak	optimal IDR thresholded peaks	hg19	K562
NRF1	ENCFF992QZV	bed narrowPeak	optimal IDR thresholded peaks	hg19	K562
NRF1	ENCFF638YFC	bed narrowPeak	optimal IDR thresholded peaks	hg19	K562
AFF1	ENCFF360BTO	bed narrowPeak	optimal IDR thresholded peaks	hg19	K562
NCOA6	ENCFF322DSX	bed narrowPeak	optimal IDR thresholded peaks	hg19	K562
BCLAF1	ENCFF462CPT	bed narrowPeak	optimal IDR thresholded peaks	hg19	K562
eGFP-HINFP	ENCFF265LKN	bed narrowPeak	optimal IDR thresholded peaks	hg19	K562
eGFP-CEBPG	ENCFF606CCB	bed narrowPeak	optimal IDR thresholded peaks	hg19	K562
eGFP-TFDP1	ENCFF701MXF	bed narrowPeak	optimal IDR thresholded peaks	hg19	K562
RNF2	ENCFF987VNY	bed narrowPeak	optimal IDR thresholded peaks	hg19	K562
RNF2	ENCFF485MXM	bed narrowPeak	optimal IDR thresholded peaks	hg19	K562
eGFP-ZBTB11	ENCFF462JFW	bed narrowPeak	optimal IDR thresholded peaks	hg19	K562
NRF1	ENCFF493ABN	bed narrowPeak	optimal IDR thresholded peaks	hg19	K562
NRF1	ENCFF809MSQ	bed narrowPeak	optimal IDR thresholded peaks	hg19	K562
eGFP-ZNF766	ENCFF248AOD	bed narrowPeak	optimal IDR thresholded peaks	hg19	K562
KDM1A	ENCFF838COI	bed narrowPeak	optimal IDR thresholded peaks	hg19	K562
3xFLAG-ZNF146	ENCFF742XBE	bed narrowPeak	pseudoreplicated IDR thresholded peaks	hg19	K562
MNT	ENCFF973OME	bed narrowPeak	optimal IDR thresholded peaks	hg19	K562
EHMT2	ENCFF806BDC	bed narrowPeak	optimal IDR thresholded peaks	hg19	K562
PHF20	ENCFF948YVM	bed narrowPeak	optimal IDR thresholded peaks	hg19	K562
REST	ENCFF895QLA	bed narrowPeak	optimal IDR thresholded peaks	hg19	K562
YBX1	ENCFF706LIT	bed narrowPeak	optimal IDR thresholded peaks	hg19	K562
HDGF	ENCFF849ZUF	bed narrowPeak	optimal IDR thresholded peaks	hg19	K562
ARNT	ENCFF471ZTZ	bed narrowPeak	optimal IDR thresholded peaks	hg19	K562
RNF2	ENCFF972LPT	bed narrowPeak	optimal IDR thresholded peaks	hg19	K562
ZNF592	ENCFF273TYA	bed narrowPeak	optimal IDR thresholded peaks	hg19	K562
ZHX1	ENCFF195ODE	bed narrowPeak	optimal IDR thresholded peaks	hg19	K562
ZHX1	ENCFF223KKR	bed narrowPeak	optimal IDR thresholded peaks	hg19	K562
NFATC3	ENCFF723RSX	bed narrowPeak	optimal IDR thresholded peaks	hg19	K562
HDAC1	ENCFF019ALY	bed narrowPeak	optimal IDR thresholded peaks	hg19	K562
GATAD2B	ENCFF549KOD	bed narrowPeak	optimal IDR thresholded peaks	hg19	K562
eGFP-NR2C1	ENCFF320THV	bed narrowPeak	optimal IDR thresholded peaks	hg19	K562
DPF2	ENCFF774QKS	bed narrowPeak	optimal IDR thresholded peaks	hg19	K562
E2F8	ENCFF925DJG	bed narrowPeak	optimal IDR thresholded peaks	hg19	K562
TRIM25	ENCFF682WUJ	bed narrowPeak	optimal IDR thresholded peaks	hg19	K562
NRF1	ENCFF144PPR	bed narrowPeak	optimal IDR thresholded peaks	hg19	K562
ETV6	ENCFF660VPM	bed narrowPeak	optimal IDR thresholded peaks	hg19	K562
CEBPZ	ENCFF925MHB	bed narrowPeak	optimal IDR thresholded peaks	hg19	K562
CEBPZ	ENCFF392TKK	bed narrowPeak	optimal IDR thresholded peaks	hg19	K562
NBN	ENCFF074EZL	bed narrowPeak	optimal IDR thresholded peaks	hg19	K562
MITF	ENCFF497XOD	bed narrowPeak	optimal IDR thresholded peaks	hg19	K562
ARHGAP35	ENCFF010MMQ	bed narrowPeak	optimal IDR thresholded peaks	hg19	K562
DPF2	ENCFF823SYE	bed narrowPeak	optimal IDR thresholded peaks	hg19	K562
eGFP-PTRF	ENCFF007DKB	bed narrowPeak	optimal IDR thresholded peaks	hg19	K562
E2F7	ENCFF310AGG	bed narrowPeak	optimal IDR thresholded peaks	hg19	K562
eGFP-ADNP	ENCFF396GUH	bed narrowPeak	optimal IDR thresholded peaks	hg19	K562
eGFP-VEZF1	ENCFF186QUP	bed narrowPeak	optimal IDR thresholded peaks	hg19	K562
RUNX1	ENCFF573DRR	bed narrowPeak	optimal IDR thresholded peaks	hg19	K562
RUNX1	ENCFF804ABO	bed narrowPeak	optimal IDR thresholded peaks	hg19	K562
RFX1	ENCFF237UAN	bed narrowPeak	optimal IDR thresholded peaks	hg19	K562
eGFP-ZNF175	ENCFF721LDD	bed narrowPeak	optimal IDR thresholded peaks	hg19	K562
eGFP-BACH1	ENCFF319BCP	bed narrowPeak	optimal IDR thresholded peaks	hg19	K562
NCOR1	ENCFF366UBB	bed narrowPeak	optimal IDR thresholded peaks	hg19	K562
POLR2B	ENCFF872JJJ	bed narrowPeak	optimal IDR thresholded peaks	hg19	K562
MITF	ENCFF616LVN	bed narrowPeak	optimal IDR thresholded peaks	hg19	K562
CTBP1	ENCFF152VMJ	bed narrowPeak	optimal IDR thresholded peaks	hg19	K562
DACH1	ENCFF526HLP	bed narrowPeak	optimal IDR thresholded peaks	hg19	K562
BRD4	ENCFF714XHL	bed narrowPeak	optimal IDR thresholded peaks	hg19	K562
ZNF24	ENCFF340PPI	bed narrowPeak	optimal IDR thresholded peaks	hg19	K562
ZFP91	ENCFF396DNK	bed narrowPeak	optimal IDR thresholded peaks	hg19	K562
E2F1	ENCFF998YJY	bed narrowPeak	optimal IDR thresholded peaks	hg19	K562
ETV6	ENCFF545VNY	bed narrowPeak	optimal IDR thresholded peaks	hg19	K562
HES1	ENCFF676NPW	bed narrowPeak	optimal IDR thresholded peaks	hg19	K562
ZBTB40	ENCFF417LEJ	bed narrowPeak	optimal IDR thresholded peaks	hg19	K562
JUN	ENCFF629BFI	bed narrowPeak	optimal IDR thresholded peaks	hg19	K562
eGFP-DDX20	ENCFF009DUY	bed narrowPeak	optimal IDR thresholded peaks	hg19	K562
ZMYM3	ENCFF511QHY	bed narrowPeak	optimal IDR thresholded peaks	hg19	K562
TRIM28	ENCFF164HLQ	bed narrowPeak	optimal IDR thresholded peaks	hg19	K562
SOX6	ENCFF241TBP	bed narrowPeak	optimal IDR thresholded peaks	hg19	K562
LEF1	ENCFF659WAF	bed narrowPeak	optimal IDR thresholded peaks	hg19	K562
eGFP-CUX1	ENCFF695CPH	bed narrowPeak	optimal IDR thresholded peaks	hg19	K562
EGR1	ENCFF004WYV	bed narrowPeak	optimal IDR thresholded peaks	hg19	K562
eGFP-ZNF395	ENCFF388YOB	bed narrowPeak	optimal IDR thresholded peaks	hg19	K562
FOXK2	ENCFF492GXZ	bed narrowPeak	optimal IDR thresholded peaks	hg19	K562
MCM5	ENCFF920RYJ	bed narrowPeak	optimal IDR thresholded peaks	hg19	K562
eGFP-MEF2D	ENCFF257RYT	bed narrowPeak	optimal IDR thresholded peaks	hg19	K562
ZNF282	ENCFF581ZZT	bed narrowPeak	optimal IDR thresholded peaks	hg19	K562
BCLAF1	ENCFF398TWC	bed narrowPeak	optimal IDR thresholded peaks	hg19	K562
POLR2A	ENCFF937VZI	bed narrowPeak	optimal IDR thresholded peaks	hg19	K562
eGFP-ZNF148	ENCFF116DIO	bed narrowPeak	optimal IDR thresholded peaks	hg19	K562
BMI1	ENCFF048OIZ	bed narrowPeak	optimal IDR thresholded peaks	hg19	K562
BMI1	ENCFF633VCV	bed narrowPeak	optimal IDR thresholded peaks	hg19	K562
eGFP-GTF2E2	ENCFF778RMG	bed narrowPeak	optimal IDR thresholded peaks	hg19	K562
FOXK2	ENCFF248VHN	bed narrowPeak	optimal IDR thresholded peaks	hg19	K562
eGFP-ZNF584	ENCFF815TTY	bed narrowPeak	optimal IDR thresholded peaks	hg19	K562
SMARCA5	ENCFF995NIE	bed narrowPeak	optimal IDR thresholded peaks	hg19	K562
MTA2	ENCFF662MVX	bed narrowPeak	optimal IDR thresholded peaks	hg19	K562
KDM4B	ENCFF477FYN	bed narrowPeak	optimal IDR thresholded peaks	hg19	K562
BRCA1	ENCFF549GMO	bed narrowPeak	optimal IDR thresholded peaks	hg19	K562
CBX1	ENCFF484DKT	bed narrowPeak	optimal IDR thresholded peaks	hg19	K562
eGFP-ZNF644	ENCFF173NRW	bed narrowPeak	optimal IDR thresholded peaks	hg19	K562
SUPT5H	ENCFF484HCG	bed narrowPeak	optimal IDR thresholded peaks	hg19	K562
eGFP-DIDO1	ENCFF408SNO	bed narrowPeak	optimal IDR thresholded peaks	hg19	K562
E2F1	ENCFF352HGW	bed narrowPeak	optimal IDR thresholded peaks	hg19	K562
E2F1	ENCFF106DAY	bed narrowPeak	optimal IDR thresholded peaks	hg19	K562
THRAP3	ENCFF294VWT	bed narrowPeak	optimal IDR thresholded peaks	hg19	K562
SREBF1	ENCFF985TSH	bed narrowPeak	optimal IDR thresholded peaks	hg19	K562
SREBF1	ENCFF890YEO	bed narrowPeak	optimal IDR thresholded peaks	hg19	K562
ZNF24	ENCFF973LDQ	bed narrowPeak	optimal IDR thresholded peaks	hg19	K562
ATF3	ENCFF958KNK	bed narrowPeak	optimal IDR thresholded peaks	hg19	K562
HDAC3	ENCFF580DYE	bed narrowPeak	optimal IDR thresholded peaks	hg19	K562
eGFP-MAFG	ENCFF927JBT	bed narrowPeak	optimal IDR thresholded peaks	hg19	K562
TARDBP	ENCFF968EAL	bed narrowPeak	optimal IDR thresholded peaks	hg19	K562
eGFP-CREB3	ENCFF665FHC	bed narrowPeak	optimal IDR thresholded peaks	hg19	K562
eGFP-KLF13	ENCFF802XZN	bed narrowPeak	optimal IDR thresholded peaks	hg19	K562
JUNB	ENCFF426DUB	bed narrowPeak	optimal IDR thresholded peaks	hg19	K562
KDM4B	ENCFF042RAK	bed narrowPeak	optimal IDR thresholded peaks	hg19	K562
RUNX1	ENCFF422BXE	bed narrowPeak	optimal IDR thresholded peaks	hg19	K562
TCF12	ENCFF242IWJ	bed narrowPeak	optimal IDR thresholded peaks	hg19	K562
RFX1	ENCFF010UHD	bed narrowPeak	optimal IDR thresholded peaks	hg19	K562
EWSR1	ENCFF820EVZ	bed narrowPeak	optimal IDR thresholded peaks	hg19	K562
POU5F1	ENCFF990CFV	bed narrowPeak	optimal IDR thresholded peaks	hg19	K562
ZZZ3	ENCFF588OLK	bed narrowPeak	optimal IDR thresholded peaks	hg19	K562
NR0B1	ENCFF954NAJ	bed narrowPeak	optimal IDR thresholded peaks	hg19	K562
HMBOX1	ENCFF558DSF	bed narrowPeak	optimal IDR thresholded peaks	hg19	K562
CC2D1A	ENCFF874QUM	bed narrowPeak	optimal IDR thresholded peaks	hg19	K562
HDAC1	ENCFF605KFA	bed narrowPeak	optimal IDR thresholded peaks	hg19	K562
CHAMP1	ENCFF602FRL	bed narrowPeak	optimal IDR thresholded peaks	hg19	K562
EP400	ENCFF925ANU	bed narrowPeak	optimal IDR thresholded peaks	hg19	K562
NR2C1	ENCFF664ZGR	bed narrowPeak	optimal IDR thresholded peaks	hg19	K562
eGFP-PYGO2	ENCFF421VCV	bed narrowPeak	optimal IDR thresholded peaks	hg19	K562
TAL1	ENCFF284LRP	bed narrowPeak	optimal IDR thresholded peaks	hg19	K562
ARID1B	ENCFF225MPC	bed narrowPeak	optimal IDR thresholded peaks	hg19	K562
SUZ12	ENCFF966MVC	bed narrowPeak	optimal IDR thresholded peaks	hg19	K562
BRD9	ENCFF666LZV	bed narrowPeak	optimal IDR thresholded peaks	hg19	K562
ZNF280A	ENCFF386WKY	bed narrowPeak	optimal IDR thresholded peaks	hg19	K562
NCOA2	ENCFF914RFS	bed narrowPeak	optimal IDR thresholded peaks	hg19	K562
ZNF830	ENCFF996IVU	bed narrowPeak	optimal IDR thresholded peaks	hg19	K562
TCF7L2	ENCFF312RFN	bed narrowPeak	optimal IDR thresholded peaks	hg19	K562
KDM1A	ENCFF738WCE	bed narrowPeak	optimal IDR thresholded peaks	hg19	K562
GMEB1	ENCFF126BCK	bed narrowPeak	optimal IDR thresholded peaks	hg19	K562
ESRRA	ENCFF213EPU	bed narrowPeak	optimal IDR thresholded peaks	hg19	K562
ESRRA	ENCFF602OKQ	bed narrowPeak	optimal IDR thresholded peaks	hg19	K562
ZBTB5	ENCFF394IKH	bed narrowPeak	optimal IDR thresholded peaks	hg19	K562
NCOA1	ENCFF297JZQ	bed narrowPeak	optimal IDR thresholded peaks	hg19	K562
MCM2	ENCFF067LIW	bed narrowPeak	optimal IDR thresholded peaks	hg19	K562
NFIC	ENCFF370ENX	bed narrowPeak	optimal IDR thresholded peaks	hg19	K562
ARNT	ENCFF507MGL	bed narrowPeak	optimal IDR thresholded peaks	hg19	K562
eGFP-ATF3	ENCFF228PSB	bed narrowPeak	optimal IDR thresholded peaks	hg19	K562
eGFP-ZNF512	ENCFF447QUG	bed narrowPeak	optimal IDR thresholded peaks	hg19	K562
MCM5	ENCFF872YNU	bed narrowPeak	optimal IDR thresholded peaks	hg19	K562
SMARCE1	ENCFF622RBW	bed narrowPeak	optimal IDR thresholded peaks	hg19	K562
SMARCA4	ENCFF883TOD	bed narrowPeak	optimal IDR thresholded peaks	hg19	K562
eGFP-ID3	ENCFF835YLR	bed narrowPeak	optimal IDR thresholded peaks	hg19	K562
PHB2	ENCFF462FRU	bed narrowPeak	optimal IDR thresholded peaks	hg19	K562
RNF2	ENCFF539WLH	bed narrowPeak	optimal IDR thresholded peaks	hg19	K562
HDAC2	ENCFF562JDH	bed narrowPeak	optimal IDR thresholded peaks	hg19	K562
eGFP-HDAC8	ENCFF939ZFS	bed narrowPeak	optimal IDR thresholded peaks	hg19	K562
NFE2	ENCFF495MHZ	bed narrowPeak	optimal IDR thresholded peaks	hg19	K562
TRIM25	ENCFF574LAO	bed narrowPeak	optimal IDR thresholded peaks	hg19	K562
DNMT1	ENCFF034PQD	bed narrowPeak	optimal IDR thresholded peaks	hg19	K562
BCOR	ENCFF057ZUY	bed narrowPeak	optimal IDR thresholded peaks	hg19	K562
SMARCA4	ENCFF197YHU	bed narrowPeak	optimal IDR thresholded peaks	hg19	K562
ZBTB5	ENCFF359QCN	bed narrowPeak	optimal IDR thresholded peaks	hg19	K562
ZKSCAN1	ENCFF163VUK	bed narrowPeak	optimal IDR thresholded peaks	hg19	K562
ZFP36	ENCFF521CRG	bed narrowPeak	optimal IDR thresholded peaks	hg19	K562
ZNF407	ENCFF602CFZ	bed narrowPeak	optimal IDR thresholded peaks	hg19	K562
ZC3H8	ENCFF809OEX	bed narrowPeak	optimal IDR thresholded peaks	hg19	K562
SETDB1	ENCFF095WDB	bed narrowPeak	pseudoreplicated IDR thresholded peaks	hg19	K562
ZC3H8	ENCFF211XFR	bed narrowPeak	optimal IDR thresholded peaks	hg19	K562
EGR1	ENCFF558JBX	bed narrowPeak	optimal IDR thresholded peaks	hg19	K562
NFATC3	ENCFF184RRU	bed narrowPeak	optimal IDR thresholded peaks	hg19	K562
ZNF318	ENCFF921WMN	bed narrowPeak	optimal IDR thresholded peaks	hg19	K562
LEF1	ENCFF043YZF	bed narrowPeak	optimal IDR thresholded peaks	hg19	K562
NCOR1	ENCFF080NBZ	bed narrowPeak	optimal IDR thresholded peaks	hg19	K562
PRDM10	ENCFF294HEI	bed narrowPeak	optimal IDR thresholded peaks	hg19	K562
MNT	ENCFF567GSX	bed narrowPeak	optimal IDR thresholded peaks	hg19	K562
AFF1	ENCFF076MSV	bed narrowPeak	optimal IDR thresholded peaks	hg19	K562
eGFP-NR4A1	ENCFF030QEM	bed narrowPeak	optimal IDR thresholded peaks	hg19	K562
MIER1	ENCFF365NKO	bed narrowPeak	optimal IDR thresholded peaks	hg19	K562
eGFP-ZNF24	ENCFF545DAF	bed narrowPeak	optimal IDR thresholded peaks	hg19	K562
GATA1	ENCFF632NQI	bed narrowPeak	optimal IDR thresholded peaks	hg19	K562
eGFP-ZNF354B	ENCFF744SVC	bed narrowPeak	optimal IDR thresholded peaks	hg19	K562
TRIM28	ENCFF858QMI	bed narrowPeak	optimal IDR thresholded peaks	hg19	K562
RAD51	ENCFF096XMD	bed narrowPeak	optimal IDR thresholded peaks	hg19	K562
RB1	ENCFF975IRM	bed narrowPeak	optimal IDR thresholded peaks	hg19	K562
CDC5L	ENCFF643TEZ	bed narrowPeak	optimal IDR thresholded peaks	hg19	K562
GTF2F1	ENCFF530FZL	bed narrowPeak	optimal IDR thresholded peaks	hg19	K562
NCOA2	ENCFF922TDM	bed narrowPeak	optimal IDR thresholded peaks	hg19	K562
MCM7	ENCFF399GAE	bed narrowPeak	optimal IDR thresholded peaks	hg19	K562
NFXL1	ENCFF986MHU	bed narrowPeak	optimal IDR thresholded peaks	hg19	K562
MGA	ENCFF670ZCR	bed narrowPeak	optimal IDR thresholded peaks	hg19	K562
ZEB2	ENCFF076IFG	bed narrowPeak	optimal IDR thresholded peaks	hg19	K562
NR2F1	ENCFF175IIE	bed narrowPeak	optimal IDR thresholded peaks	hg19	K562
FOXM1	ENCFF699ZII	bed narrowPeak	optimal IDR thresholded peaks	hg19	K562
ZNF384	ENCFF706SJZ	bed narrowPeak	optimal IDR thresholded peaks	hg19	K562
TAF9B	ENCFF785HXY	bed narrowPeak	optimal IDR thresholded peaks	hg19	K562
IKZF1	ENCFF886VSU	bed narrowPeak	optimal IDR thresholded peaks	hg19	K562
MCM7	ENCFF452SVO	bed narrowPeak	optimal IDR thresholded peaks	hg19	K562
MCM7	ENCFF278ONE	bed narrowPeak	optimal IDR thresholded peaks	hg19	K562
ELF1	ENCFF392MUM	bed narrowPeak	optimal IDR thresholded peaks	hg19	K562
NCOA1	ENCFF701NVT	bed narrowPeak	optimal IDR thresholded peaks	hg19	K562
ZSCAN29	ENCFF253NXR	bed narrowPeak	optimal IDR thresholded peaks	hg19	K562
eGFP-GTF2A2	ENCFF167HYX	bed narrowPeak	optimal IDR thresholded peaks	hg19	K562
RNF2	ENCFF644WLI	bed narrowPeak	optimal IDR thresholded peaks	hg19	K562
eGFP-POLR2H	ENCFF801YZV	bed narrowPeak	optimal IDR thresholded peaks	hg19	K562
CSDE1	ENCFF821VBM	bed narrowPeak	optimal IDR thresholded peaks	hg19	K562
ZNF639	ENCFF708BTH	bed narrowPeak	optimal IDR thresholded peaks	hg19	K562
NR2F6	ENCFF712AXK	bed narrowPeak	optimal IDR thresholded peaks	hg19	K562
eGFP-ZNF507	ENCFF834WGJ	bed narrowPeak	optimal IDR thresholded peaks	hg19	K562
ZNF316	ENCFF788EBS	bed narrowPeak	optimal IDR thresholded peaks	hg19	K562
eGFP-ZNF740	ENCFF545RHH	bed narrowPeak	optimal IDR thresholded peaks	hg19	K562
ZNF407	ENCFF932UEC	bed narrowPeak	optimal IDR thresholded peaks	hg19	K562
IKZF1	ENCFF968JVX	bed narrowPeak	optimal IDR thresholded peaks	hg19	K562
SMARCC2	ENCFF114PTZ	bed narrowPeak	optimal IDR thresholded peaks	hg19	K562
HLTF	ENCFF396NSO	bed narrowPeak	optimal IDR thresholded peaks	hg19	K562
ZNF184	ENCFF556YCY	bed narrowPeak	optimal IDR thresholded peaks	hg19	K562
FOXA1	ENCFF809YFY	bed narrowPeak	optimal IDR thresholded peaks	hg19	K562
ZBTB2	ENCFF561USY	bed narrowPeak	optimal IDR thresholded peaks	hg19	K562
ZNF639	ENCFF284PKK	bed narrowPeak	optimal IDR thresholded peaks	hg19	K562
TRIM24	ENCFF049CRW	bed narrowPeak	optimal IDR thresholded peaks	hg19	K562
KAT8	ENCFF772QPO	bed narrowPeak	optimal IDR thresholded peaks	hg19	K562
MCM2	ENCFF226CZE	bed narrowPeak	optimal IDR thresholded peaks	hg19	K562
RLF	ENCFF209HKW	bed narrowPeak	optimal IDR thresholded peaks	hg19	K562
ZNF318	ENCFF698MLW	bed narrowPeak	optimal IDR thresholded peaks	hg19	K562
THRA	ENCFF671BFH	bed narrowPeak	optimal IDR thresholded peaks	hg19	K562
HCFC1	ENCFF474NLG	bed narrowPeak	optimal IDR thresholded peaks	hg19	K562
ZMIZ1	ENCFF597DIY	bed narrowPeak	optimal IDR thresholded peaks	hg19	K562
XRCC3	ENCFF803LEC	bed narrowPeak	optimal IDR thresholded peaks	hg19	K562
CSDE1	ENCFF117EWO	bed narrowPeak	optimal IDR thresholded peaks	hg19	K562
NCOR1	ENCFF165BCW	bed narrowPeak	optimal IDR thresholded peaks	hg19	K562
DEAF1	ENCFF786WZD	bed narrowPeak	optimal IDR thresholded peaks	hg19	K562
E4F1	ENCFF083YCQ	bed narrowPeak	optimal IDR thresholded peaks	hg19	K562
MTA3	ENCFF350YXB	bed narrowPeak	optimal IDR thresholded peaks	hg19	K562
CBX3	ENCFF005BKP	bed narrowPeak	pseudoreplicated IDR thresholded peaks	hg19	K562
ZNF184	ENCFF728NEV	bed narrowPeak	optimal IDR thresholded peaks	hg19	K562
TCF12	ENCFF493TZM	bed narrowPeak	optimal IDR thresholded peaks	hg19	K562
eGFP-USF2	ENCFF417TXD	bed narrowPeak	optimal IDR thresholded peaks	hg19	K562
eGFP-ZFX	ENCFF433RKB	bed narrowPeak	optimal IDR thresholded peaks	hg19	K562
eGFP-FOXJ2	ENCFF452SPE	bed narrowPeak	optimal IDR thresholded peaks	hg19	K562
ZBTB33	ENCFF408FQC	bed narrowPeak	optimal IDR thresholded peaks	hg19	K562
CBFA2T2	ENCFF642BNC	bed narrowPeak	optimal IDR thresholded peaks	hg19	K562
KAT2B	ENCFF185GBT	bed narrowPeak	pseudoreplicated IDR thresholded peaks	hg19	K562
ARNT	ENCFF944GZI	bed narrowPeak	optimal IDR thresholded peaks	hg19	K562
eGFP-E2F5	ENCFF356ASJ	bed narrowPeak	optimal IDR thresholded peaks	hg19	K562
CBFA2T3	ENCFF993GXU	bed narrowPeak	optimal IDR thresholded peaks	hg19	K562
HDAC1	ENCFF996CUX	bed narrowPeak	optimal IDR thresholded peaks	hg19	K562
PHF21A	ENCFF134CUM	bed narrowPeak	optimal IDR thresholded peaks	hg19	K562
SIN3B	ENCFF280GTU	bed narrowPeak	optimal IDR thresholded peaks	hg19	K562
GATAD2A	ENCFF253FZN	bed narrowPeak	optimal IDR thresholded peaks	hg19	K562
eGFP-PBX2	ENCFF168HAG	bed narrowPeak	optimal IDR thresholded peaks	hg19	K562
NKRF	ENCFF906PGD	bed narrowPeak	optimal IDR thresholded peaks	hg19	K562
eGFP-NFE2	ENCFF911VSD	bed narrowPeak	optimal IDR thresholded peaks	hg19	K562
ZNF830	ENCFF901AHW	bed narrowPeak	optimal IDR thresholded peaks	hg19	K562
NFRKB	ENCFF157UUF	bed narrowPeak	optimal IDR thresholded peaks	hg19	K562
C11orf30	ENCFF996ZGL	bed narrowPeak	optimal IDR thresholded peaks	hg19	K562
eGFP-CEBPB	ENCFF828JWK	bed narrowPeak	optimal IDR thresholded peaks	hg19	K562
MYBL2	ENCFF877ANE	bed narrowPeak	optimal IDR thresholded peaks	hg19	K562
CHAMP1	ENCFF859FVX	bed narrowPeak	optimal IDR thresholded peaks	hg19	K562
SIX5	ENCFF033EBX	bed narrowPeak	optimal IDR thresholded peaks	hg19	K562
ZBTB8A	ENCFF589EVD	bed narrowPeak	optimal IDR thresholded peaks	hg19	K562
eGFP-ZNF740	ENCFF898FAQ	bed narrowPeak	optimal IDR thresholded peaks	hg19	K562
TRIM24	ENCFF646VQW	bed narrowPeak	optimal IDR thresholded peaks	hg19	K562
eGFP-ATF1	ENCFF232KAH	bed narrowPeak	optimal IDR thresholded peaks	hg19	K562
NFRKB	ENCFF677OWM	bed narrowPeak	optimal IDR thresholded peaks	hg19	K562
MCM3	ENCFF679ITJ	bed narrowPeak	optimal IDR thresholded peaks	hg19	K562
WHSC1	ENCFF119SZQ	bed narrowPeak	pseudoreplicated IDR thresholded peaks	hg19	K562
NUFIP1	ENCFF289BUU	bed narrowPeak	optimal IDR thresholded peaks	hg19	K562
KHSRP	ENCFF962VSZ	bed narrowPeak	optimal IDR thresholded peaks	hg19	K562
CREBBP	ENCFF369HGX	bed narrowPeak	pseudoreplicated IDR thresholded peaks	hg19	K562
3xFLAG-PBX2	ENCFF269EMM	bed narrowPeak	optimal IDR thresholded peaks	hg19	K562
TRIP13	ENCFF561IZB	bed narrowPeak	optimal IDR thresholded peaks	hg19	K562
SIRT6	ENCFF671JEN	bed narrowPeak	pseudoreplicated IDR thresholded peaks	hg19	K562
NR3C1	ENCFF583CIY	bed narrowPeak	optimal IDR thresholded peaks	hg19	K562
eGFP-ZKSCAN8	ENCFF529FWJ	bed narrowPeak	optimal IDR thresholded peaks	hg19	K562
SMAD5	ENCFF178MOP	bed narrowPeak	optimal IDR thresholded peaks	hg19	K562
COPS2	ENCFF684MLP	bed narrowPeak	optimal IDR thresholded peaks	hg19	K562
3xFLAG-ATF1	ENCFF030HWZ	bed narrowPeak	optimal IDR thresholded peaks	hg19	K562
MTA1	ENCFF769GYG	bed narrowPeak	optimal IDR thresholded peaks	hg19	K562
ZBTB11	ENCFF434QZL	bed narrowPeak	optimal IDR thresholded peaks	hg19	K562
ZSCAN29	ENCFF303PMJ	bed narrowPeak	optimal IDR thresholded peaks	hg19	K562
YBX3	ENCFF246HIU	bed narrowPeak	optimal IDR thresholded peaks	hg19	K562
ZC3H11A	ENCFF522JRK	bed narrowPeak	optimal IDR thresholded peaks	hg19	K562
ZNF316	ENCFF442ZUF	bed narrowPeak	optimal IDR thresholded peaks	hg19	K562
TOE1	ENCFF262BVP	bed narrowPeak	optimal IDR thresholded peaks	hg19	K562
TARDBP	ENCFF261XPP	bed narrowPeak	optimal IDR thresholded peaks	hg19	K562
L3MBTL2	ENCFF314ULQ	bed narrowPeak	optimal IDR thresholded peaks	hg19	K562
SKIL	ENCFF481WGW	bed narrowPeak	optimal IDR thresholded peaks	hg19	K562
ZEB2	ENCFF407AOX	bed narrowPeak	optimal IDR thresholded peaks	hg19	K562
PKNOX1	ENCFF544XKC	bed narrowPeak	optimal IDR thresholded peaks	hg19	K562
MYNN	ENCFF583DZD	bed narrowPeak	optimal IDR thresholded peaks	hg19	K562
RFX5	ENCFF002CXV	bed narrowPeak	optimal IDR thresholded peaks	hg19	K562
RFX5	ENCFF716LRI	bed narrowPeak	optimal IDR thresholded peaks	hg19	K562
SIN3A	ENCFF191MPD	bed narrowPeak	optimal IDR thresholded peaks	hg19	K562
GABPB1	ENCFF517KRT	bed narrowPeak	optimal IDR thresholded peaks	hg19	K562
NR3C1	ENCFF784FIE	bed narrowPeak	optimal IDR thresholded peaks	hg19	K562
POLR2A	ENCFF002CXQ	bed narrowPeak	optimal IDR thresholded peaks	hg19	K562
POLR2A	ENCFF394LOQ	bed narrowPeak	optimal IDR thresholded peaks	hg19	K562
SRSF1	ENCFF798URE	bed narrowPeak	optimal IDR thresholded peaks	hg19	K562
eGFP-CEBPG	ENCFF272ULO	bed narrowPeak	optimal IDR thresholded peaks	hg19	K562
POLR2AphosphoS2	ENCFF002CXS	bed narrowPeak	optimal IDR thresholded peaks	hg19	K562
POLR2AphosphoS2	ENCFF296CNQ	bed narrowPeak	optimal IDR thresholded peaks	hg19	K562
BCLAF1	ENCFF002CLP	bed narrowPeak	optimal IDR thresholded peaks	hg19	K562
BCLAF1	ENCFF203EDM	bed narrowPeak	optimal IDR thresholded peaks	hg19	K562
ATF3	ENCFF002CVN	bed narrowPeak	optimal IDR thresholded peaks	hg19	K562
SRSF7	ENCFF059WVE	bed narrowPeak	optimal IDR thresholded peaks	hg19	K562
GTF3C2	ENCFF002CYL	bed narrowPeak	optimal IDR thresholded peaks	hg19	K562
E2F6	ENCFF002CLU	bed narrowPeak	optimal IDR thresholded peaks	hg19	K562
E2F6	ENCFF917COW	bed narrowPeak	optimal IDR thresholded peaks	hg19	K562
STAT2	ENCFF002CYG	bed narrowPeak	optimal IDR thresholded peaks	hg19	K562
STAT2	ENCFF841YFF	bed narrowPeak	optimal IDR thresholded peaks	hg19	K562
TARDBP	ENCFF905VXX	bed narrowPeak	optimal IDR thresholded peaks	hg19	K562
JUN	ENCFF002CWA	bed narrowPeak	optimal IDR thresholded peaks	hg19	K562
JUN	ENCFF417QAJ	bed narrowPeak	optimal IDR thresholded peaks	hg19	K562
ELF1	ENCFF002CLW	bed narrowPeak	optimal IDR thresholded peaks	hg19	K562
ELF1	ENCFF564WEB	bed narrowPeak	optimal IDR thresholded peaks	hg19	K562
POLR2A	ENCFF002CXO	bed narrowPeak	optimal IDR thresholded peaks	hg19	K562
POLR2A	ENCFF270QAB	bed narrowPeak	optimal IDR thresholded peaks	hg19	K562
POLR2A	ENCFF002CXM	bed narrowPeak	optimal IDR thresholded peaks	hg19	K562
POLR2A	ENCFF662YQK	bed narrowPeak	optimal IDR thresholded peaks	hg19	K562
THAP1	ENCFF002CMU	bed narrowPeak	optimal IDR thresholded peaks	hg19	K562
THAP1	ENCFF641LJY	bed narrowPeak	optimal IDR thresholded peaks	hg19	K562
CHD2	ENCFF002CVX	bed narrowPeak	optimal IDR thresholded peaks	hg19	K562
JUN	ENCFF002CWB	bed narrowPeak	optimal IDR thresholded peaks	hg19	K562
JUN	ENCFF192BTP	bed narrowPeak	optimal IDR thresholded peaks	hg19	K562
ETS1	ENCFF002CLX	bed narrowPeak	optimal IDR thresholded peaks	hg19	K562
ETS1	ENCFF076YZO	bed narrowPeak	optimal IDR thresholded peaks	hg19	K562
HDAC2	ENCFF002CMB	bed narrowPeak	optimal IDR thresholded peaks	hg19	K562
HDAC2	ENCFF667HLC	bed narrowPeak	optimal IDR thresholded peaks	hg19	K562
CTCF	ENCFF002DDJ	bed narrowPeak	optimal IDR thresholded peaks	hg19	K562
SAFB2	ENCFF624NUZ	bed narrowPeak	optimal IDR thresholded peaks	hg19	K562
AGO1	ENCFF836VRV	bed narrowPeak	optimal IDR thresholded peaks	hg19	K562
POLR2AphosphoS5	ENCFF002CMH	bed narrowPeak	optimal IDR thresholded peaks	hg19	K562
POLR2AphosphoS5	ENCFF542DOG	bed narrowPeak	optimal IDR thresholded peaks	hg19	K562
SAFB	ENCFF478MPX	bed narrowPeak	optimal IDR thresholded peaks	hg19	K562
MAZ	ENCFF002CXE	bed narrowPeak	optimal IDR thresholded peaks	hg19	K562
YY1	ENCFF002CMX	bed narrowPeak	optimal IDR thresholded peaks	hg19	K562
YY1	ENCFF328XKC	bed narrowPeak	optimal IDR thresholded peaks	hg19	K562
BACH1	ENCFF002CVO	bed narrowPeak	optimal IDR thresholded peaks	hg19	K562
BACH1	ENCFF423EMU	bed narrowPeak	optimal IDR thresholded peaks	hg19	K562
RBM25	ENCFF680WBN	bed narrowPeak	optimal IDR thresholded peaks	hg19	K562
UBTF	ENCFF002CYN	bed narrowPeak	optimal IDR thresholded peaks	hg19	K562
UBTF	ENCFF938IOJ	bed narrowPeak	optimal IDR thresholded peaks	hg19	K562
RBM39	ENCFF209JJD	bed narrowPeak	optimal IDR thresholded peaks	hg19	K562
SETDB1	ENCFF002CXX	bed narrowPeak	optimal IDR thresholded peaks	hg19	K562
PML	ENCFF002CMG	bed narrowPeak	optimal IDR thresholded peaks	hg19	K562
PML	ENCFF881QBT	bed narrowPeak	optimal IDR thresholded peaks	hg19	K562
CTCFL	ENCFF002CLT	bed narrowPeak	optimal IDR thresholded peaks	hg19	K562
CTCFL	ENCFF962FQM	bed narrowPeak	optimal IDR thresholded peaks	hg19	K562
CUX1	ENCFF517YCC	bed narrowPeak	optimal IDR thresholded peaks	hg19	K562
SRSF9	ENCFF137IBM	bed narrowPeak	optimal IDR thresholded peaks	hg19	K562
SP1	ENCFF002CMN	bed narrowPeak	optimal IDR thresholded peaks	hg19	K562
RBBP5	ENCFF002CEU	bed narrowPeak	optimal IDR thresholded peaks	hg19	K562
RBBP5	ENCFF379MPS	bed narrowPeak	optimal IDR thresholded peaks	hg19	K562
MAFF	ENCFF002CXB	bed narrowPeak	optimal IDR thresholded peaks	hg19	K562
MAFF	ENCFF308IXJ	bed narrowPeak	optimal IDR thresholded peaks	hg19	K562
SFPQ	ENCFF757ODD	bed narrowPeak	optimal IDR thresholded peaks	hg19	K562
CBX8	ENCFF456PQY	bed narrowPeak	optimal IDR thresholded peaks	hg19	K562
ELK1	ENCFF002CWO	bed narrowPeak	optimal IDR thresholded peaks	hg19	K562
ELK1	ENCFF019PEL	bed narrowPeak	optimal IDR thresholded peaks	hg19	K562
TBL1XR1	ENCFF002CYI	bed narrowPeak	optimal IDR thresholded peaks	hg19	K562
TBL1XR1	ENCFF048OBR	bed narrowPeak	optimal IDR thresholded peaks	hg19	K562
SETDB1	ENCFF002CXY	bed narrowPeak	optimal IDR thresholded peaks	hg19	K562
SETDB1	ENCFF294EHN	bed narrowPeak	optimal IDR thresholded peaks	hg19	K562
RBM15	ENCFF971VJZ	bed narrowPeak	optimal IDR thresholded peaks	hg19	K562
SRF	ENCFF002CMP	bed narrowPeak	optimal IDR thresholded peaks	hg19	K562
eGFP-GATA2	ENCFF002DDW	bed narrowPeak	optimal IDR thresholded peaks	hg19	K562
eGFP-GATA2	ENCFF929YBC	bed narrowPeak	optimal IDR thresholded peaks	hg19	K562
CBX3	ENCFF002CLQ	bed narrowPeak	optimal IDR thresholded peaks	hg19	K562
CBX3	ENCFF455TDM	bed narrowPeak	optimal IDR thresholded peaks	hg19	K562
MAFK	ENCFF002CXC	bed narrowPeak	optimal IDR thresholded peaks	hg19	K562
MAFK	ENCFF812QPN	bed narrowPeak	optimal IDR thresholded peaks	hg19	K562
POLR2G	ENCFF273EYJ	bed narrowPeak	optimal IDR thresholded peaks	hg19	K562
POLR3G	ENCFF002CXT	bed narrowPeak	optimal IDR thresholded peaks	hg19	K562
TAF1	ENCFF002CMR	bed narrowPeak	optimal IDR thresholded peaks	hg19	K562
TAF1	ENCFF822FWM	bed narrowPeak	optimal IDR thresholded peaks	hg19	K562
SUZ12	ENCFF507XOB	bed narrowPeak	optimal IDR thresholded peaks	hg19	K562
JUN	ENCFF002CVZ	bed narrowPeak	optimal IDR thresholded peaks	hg19	K562
JUN	ENCFF573GQX	bed narrowPeak	optimal IDR thresholded peaks	hg19	K562
GTF2F1	ENCFF246VJH	bed narrowPeak	optimal IDR thresholded peaks	hg19	K562
EZH2	ENCFF002CEM	bed narrowPeak	optimal IDR thresholded peaks	hg19	K562
MYC	ENCFF002CWI	bed narrowPeak	optimal IDR thresholded peaks	hg19	K562
NELFE	ENCFF002CXG	bed narrowPeak	optimal IDR thresholded peaks	hg19	K562
PHF8	ENCFF002CER	bed narrowPeak	optimal IDR thresholded peaks	hg19	K562
PHF8	ENCFF626KTJ	bed narrowPeak	optimal IDR thresholded peaks	hg19	K562
SMARCB1	ENCFF002CWU	bed narrowPeak	optimal IDR thresholded peaks	hg19	K562
SMARCB1	ENCFF944GJH	bed narrowPeak	optimal IDR thresholded peaks	hg19	K562
STAT2	ENCFF002CYF	bed narrowPeak	optimal IDR thresholded peaks	hg19	K562
STAT2	ENCFF714VIT	bed narrowPeak	optimal IDR thresholded peaks	hg19	K562
eGFP-JUNB	ENCFF002DDY	bed narrowPeak	optimal IDR thresholded peaks	hg19	K562
TAF7	ENCFF002CMS	bed narrowPeak	optimal IDR thresholded peaks	hg19	K562
TAF7	ENCFF034CQR	bed narrowPeak	optimal IDR thresholded peaks	hg19	K562
PCBP2	ENCFF881XQF	bed narrowPeak	optimal IDR thresholded peaks	hg19	K562
CTCF	ENCFF002CWL	bed narrowPeak	optimal IDR thresholded peaks	hg19	K562
CTCF	ENCFF738TKN	bed narrowPeak	optimal IDR thresholded peaks	hg19	K562
MYC	ENCFF002CWE	bed narrowPeak	optimal IDR thresholded peaks	hg19	K562
MYC	ENCFF387LTN	bed narrowPeak	optimal IDR thresholded peaks	hg19	K562
POLR2A	ENCFF002CMI	bed narrowPeak	optimal IDR thresholded peaks	hg19	K562
POLR2A	ENCFF947KPB	bed narrowPeak	optimal IDR thresholded peaks	hg19	K562
BRF1	ENCFF002CVR	bed narrowPeak	optimal IDR thresholded peaks	hg19	K562
FIP1L1	ENCFF883WYX	bed narrowPeak	optimal IDR thresholded peaks	hg19	K562
CTCF	ENCFF002CEL	bed narrowPeak	optimal IDR thresholded peaks	hg19	K562
YY1	ENCFF002CMW	bed narrowPeak	optimal IDR thresholded peaks	hg19	K562
YY1	ENCFF926FUM	bed narrowPeak	optimal IDR thresholded peaks	hg19	K562
MAX	ENCFF002CXD	bed narrowPeak	optimal IDR thresholded peaks	hg19	K562
MAX	ENCFF799HIG	bed narrowPeak	optimal IDR thresholded peaks	hg19	K562
HDAC2	ENCFF002CEO	bed narrowPeak	optimal IDR thresholded peaks	hg19	K562
HDAC2	ENCFF657VJX	bed narrowPeak	optimal IDR thresholded peaks	hg19	K562
ATF1	ENCFF002CVM	bed narrowPeak	optimal IDR thresholded peaks	hg19	K562
POLR2A	ENCFF002DBE	bed narrowPeak	optimal IDR thresholded peaks	hg19	K562
JUN	ENCFF002CVY	bed narrowPeak	optimal IDR thresholded peaks	hg19	K562
JUN	ENCFF077UYM	bed narrowPeak	optimal IDR thresholded peaks	hg19	K562
POLR2A	ENCFF002CXR	bed narrowPeak	optimal IDR thresholded peaks	hg19	K562
ARID3A	ENCFF002CVL	bed narrowPeak	optimal IDR thresholded peaks	hg19	K562
ARID3A	ENCFF835KAT	bed narrowPeak	optimal IDR thresholded peaks	hg19	K562
HNRNPUL1	ENCFF768TJI	bed narrowPeak	optimal IDR thresholded peaks	hg19	K562
FOSL1	ENCFF002CLY	bed narrowPeak	optimal IDR thresholded peaks	hg19	K562
FOSL1	ENCFF473GCH	bed narrowPeak	optimal IDR thresholded peaks	hg19	K562
MYC	ENCFF002CWH	bed narrowPeak	optimal IDR thresholded peaks	hg19	K562
MYC	ENCFF465JKF	bed narrowPeak	optimal IDR thresholded peaks	hg19	K562
GTF2B	ENCFF002CWR	bed narrowPeak	optimal IDR thresholded peaks	hg19	K562
SIRT6	ENCFF002CXZ	bed narrowPeak	optimal IDR thresholded peaks	hg19	K562
STAT1	ENCFF002CYE	bed narrowPeak	optimal IDR thresholded peaks	hg19	K562
STAT1	ENCFF648NYF	bed narrowPeak	optimal IDR thresholded peaks	hg19	K562
POLR2A	ENCFF002CXP	bed narrowPeak	optimal IDR thresholded peaks	hg19	K562
POLR2A	ENCFF853ZMA	bed narrowPeak	optimal IDR thresholded peaks	hg19	K562
HDAC6	ENCFF002CEP	bed narrowPeak	optimal IDR thresholded peaks	hg19	K562
HDAC6	ENCFF998HOR	bed narrowPeak	optimal IDR thresholded peaks	hg19	K562
GTF2F1	ENCFF002CWS	bed narrowPeak	optimal IDR thresholded peaks	hg19	K562
GTF2F1	ENCFF156WRH	bed narrowPeak	optimal IDR thresholded peaks	hg19	K562
MYC	ENCFF002DBC	bed narrowPeak	optimal IDR thresholded peaks	hg19	K562
POLR2AphosphoS2	ENCFF002DDU	bed narrowPeak	optimal IDR thresholded peaks	hg19	K562
GATA2	ENCFF002CMA	bed narrowPeak	optimal IDR thresholded peaks	hg19	K562
SP2	ENCFF002CMO	bed narrowPeak	optimal IDR thresholded peaks	hg19	K562
RBM14	ENCFF682SIY	bed narrowPeak	optimal IDR thresholded peaks	hg19	K562
XRCC5	ENCFF998KKJ	bed narrowPeak	optimal IDR thresholded peaks	hg19	K562
POLR3A	ENCFF002CXW	bed narrowPeak	optimal IDR thresholded peaks	hg19	K562
REST	ENCFF002CMF	bed narrowPeak	optimal IDR thresholded peaks	hg19	K562
REST	ENCFF558VPP	bed narrowPeak	optimal IDR thresholded peaks	hg19	K562
STAT1	ENCFF002CYC	bed narrowPeak	optimal IDR thresholded peaks	hg19	K562
STAT1	ENCFF254MPF	bed narrowPeak	optimal IDR thresholded peaks	hg19	K562
MXI1	ENCFF002CXF	bed narrowPeak	optimal IDR thresholded peaks	hg19	K562
MXI1	ENCFF970LCB	bed narrowPeak	optimal IDR thresholded peaks	hg19	K562
eGFP-FOS	ENCFF002DDV	bed narrowPeak	optimal IDR thresholded peaks	hg19	K562
IRF1	ENCFF002CWV	bed narrowPeak	optimal IDR thresholded peaks	hg19	K562
IRF1	ENCFF730RUF	bed narrowPeak	optimal IDR thresholded peaks	hg19	K562
TBP	ENCFF002CYK	bed narrowPeak	optimal IDR thresholded peaks	hg19	K562
TBP	ENCFF380FJL	bed narrowPeak	optimal IDR thresholded peaks	hg19	K562
SNRNP70	ENCFF033KXY	bed narrowPeak	optimal IDR thresholded peaks	hg19	K562
YY1	ENCFF002CYQ	bed narrowPeak	optimal IDR thresholded peaks	hg19	K562
YY1	ENCFF557DSM	bed narrowPeak	optimal IDR thresholded peaks	hg19	K562
IRF1	ENCFF002CWW	bed narrowPeak	optimal IDR thresholded peaks	hg19	K562
IRF1	ENCFF909LKK	bed narrowPeak	optimal IDR thresholded peaks	hg19	K562
HDAC1	ENCFF002CEN	bed narrowPeak	optimal IDR thresholded peaks	hg19	K562
HDAC1	ENCFF357NRL	bed narrowPeak	optimal IDR thresholded peaks	hg19	K562
TBL1XR1	ENCFF002CYJ	bed narrowPeak	optimal IDR thresholded peaks	hg19	K562
TBL1XR1	ENCFF626MVT	bed narrowPeak	optimal IDR thresholded peaks	hg19	K562
TAF15	ENCFF617CAZ	bed narrowPeak	optimal IDR thresholded peaks	hg19	K562
ATF3	ENCFF002CLN	bed narrowPeak	optimal IDR thresholded peaks	hg19	K562
ATF3	ENCFF475TQE	bed narrowPeak	optimal IDR thresholded peaks	hg19	K562
NR2C2	ENCFF002CYM	bed narrowPeak	optimal IDR thresholded peaks	hg19	K562
NR2C2	ENCFF594LCH	bed narrowPeak	optimal IDR thresholded peaks	hg19	K562
U2AF2	ENCFF398EQF	bed narrowPeak	optimal IDR thresholded peaks	hg19	K562
SIX5	ENCFF002CMM	bed narrowPeak	optimal IDR thresholded peaks	hg19	K562
HNRNPL	ENCFF010STZ	bed narrowPeak	optimal IDR thresholded peaks	hg19	K562
ZNF274	ENCFF002CYT	bed narrowPeak	optimal IDR thresholded peaks	hg19	K562
ZNF274	ENCFF836LBG	bed narrowPeak	optimal IDR thresholded peaks	hg19	K562
RCOR1	ENCFF002CWJ	bed narrowPeak	optimal IDR thresholded peaks	hg19	K562
RCOR1	ENCFF484CKD	bed narrowPeak	optimal IDR thresholded peaks	hg19	K562
RBM22	ENCFF522JUV	bed narrowPeak	optimal IDR thresholded peaks	hg19	K562
RBFOX2	ENCFF120IDE	bed narrowPeak	optimal IDR thresholded peaks	hg19	K562
RAD21	ENCFF002CMK	bed narrowPeak	optimal IDR thresholded peaks	hg19	K562
LARP7	ENCFF511OXK	bed narrowPeak	optimal IDR thresholded peaks	hg19	K562
POLR2A	ENCFF248IWJ	bed narrowPeak	optimal IDR thresholded peaks	hg19	K562
SMARCA4	ENCFF002CVT	bed narrowPeak	optimal IDR thresholded peaks	hg19	K562
SMARCA4	ENCFF710LRU	bed narrowPeak	optimal IDR thresholded peaks	hg19	K562
E2F6	ENCFF002CWN	bed narrowPeak	optimal IDR thresholded peaks	hg19	K562
CTCF	ENCFF002CLS	bed narrowPeak	optimal IDR thresholded peaks	hg19	K562
CTCF	ENCFF085HTY	bed narrowPeak	optimal IDR thresholded peaks	hg19	K562
SIN3A	ENCFF002CML	bed narrowPeak	optimal IDR thresholded peaks	hg19	K562
SIN3A	ENCFF803COK	bed narrowPeak	optimal IDR thresholded peaks	hg19	K562
HNRNPLL	ENCFF122QSN	bed narrowPeak	optimal IDR thresholded peaks	hg19	K562
CHD1	ENCFF002CEK	bed narrowPeak	optimal IDR thresholded peaks	hg19	K562
ZNF263	ENCFF002CYS	bed narrowPeak	optimal IDR thresholded peaks	hg19	K562
ZNF263	ENCFF891MVM	bed narrowPeak	optimal IDR thresholded peaks	hg19	K562
CCNT2	ENCFF002CVU	bed narrowPeak	optimal IDR thresholded peaks	hg19	K562
CCAR2	ENCFF583GKE	bed narrowPeak	optimal IDR thresholded peaks	hg19	K562
PTBP1	ENCFF694BIA	bed narrowPeak	optimal IDR thresholded peaks	hg19	K562
EP300	ENCFF002CXL	bed narrowPeak	optimal IDR thresholded peaks	hg19	K562
EP300	ENCFF549TYR	bed narrowPeak	optimal IDR thresholded peaks	hg19	K562
IRF1	ENCFF002CWY	bed narrowPeak	optimal IDR thresholded peaks	hg19	K562
IRF1	ENCFF284VUQ	bed narrowPeak	optimal IDR thresholded peaks	hg19	K562
UBTF	ENCFF002CYO	bed narrowPeak	optimal IDR thresholded peaks	hg19	K562
UBTF	ENCFF671DOL	bed narrowPeak	optimal IDR thresholded peaks	hg19	K562
IRF1	ENCFF002CWX	bed narrowPeak	optimal IDR thresholded peaks	hg19	K562
IRF1	ENCFF908UIY	bed narrowPeak	optimal IDR thresholded peaks	hg19	K562
NFYB	ENCFF002CXJ	bed narrowPeak	optimal IDR thresholded peaks	hg19	K562
NFYB	ENCFF113PMT	bed narrowPeak	optimal IDR thresholded peaks	hg19	K562
GATA1	ENCFF002CWP	bed narrowPeak	optimal IDR thresholded peaks	hg19	K562
GATA1	ENCFF659WGE	bed narrowPeak	optimal IDR thresholded peaks	hg19	K562
eGFP-JUND	ENCFF002DDZ	bed narrowPeak	optimal IDR thresholded peaks	hg19	K562
TAL1	ENCFF002CYH	bed narrowPeak	optimal IDR thresholded peaks	hg19	K562
TAL1	ENCFF482CEV	bed narrowPeak	optimal IDR thresholded peaks	hg19	K562
FUS	ENCFF142CPK	bed narrowPeak	optimal IDR thresholded peaks	hg19	K562
BRF2	ENCFF002CVS	bed narrowPeak	optimal IDR thresholded peaks	hg19	K562
SRSF3	ENCFF722XRW	bed narrowPeak	optimal IDR thresholded peaks	hg19	K562
ZBTB7A	ENCFF002CMZ	bed narrowPeak	optimal IDR thresholded peaks	hg19	K562
ZBTB7A	ENCFF706ISJ	bed narrowPeak	optimal IDR thresholded peaks	hg19	K562
RBM17	ENCFF861YKK	bed narrowPeak	optimal IDR thresholded peaks	hg19	K562
NFE2	ENCFF002CXH	bed narrowPeak	optimal IDR thresholded peaks	hg19	K562
CEBPB	ENCFF002CLR	bed narrowPeak	optimal IDR thresholded peaks	hg19	K562
RBM34	ENCFF782GWS	bed narrowPeak	optimal IDR thresholded peaks	hg19	K562
NONO	ENCFF134NMW	bed narrowPeak	optimal IDR thresholded peaks	hg19	K562
STAT5A	ENCFF002CMQ	bed narrowPeak	optimal IDR thresholded peaks	hg19	K562
STAT5A	ENCFF696KPD	bed narrowPeak	optimal IDR thresholded peaks	hg19	K562
HMGN3	ENCFF002CWT	bed narrowPeak	optimal IDR thresholded peaks	hg19	K562
3xFLAG-ZNF3	ENCFF510PVQ	bed narrowPeak	pseudoreplicated IDR thresholded peaks	hg19	K562
ZNF274	ENCFF002CYU	bed narrowPeak	optimal IDR thresholded peaks	hg19	K562
ZNF274	ENCFF344QKL	bed narrowPeak	optimal IDR thresholded peaks	hg19	K562
POLR2A	ENCFF002CXN	bed narrowPeak	optimal IDR thresholded peaks	hg19	K562
POLR2A	ENCFF206YXX	bed narrowPeak	optimal IDR thresholded peaks	hg19	K562
STAT1	ENCFF002CYB	bed narrowPeak	optimal IDR thresholded peaks	hg19	K562
STAT1	ENCFF290HTJ	bed narrowPeak	optimal IDR thresholded peaks	hg19	K562
ZBTB33	ENCFF002CMY	bed narrowPeak	optimal IDR thresholded peaks	hg19	K562
RAD21	ENCFF002CXU	bed narrowPeak	optimal IDR thresholded peaks	hg19	K562
PRPF4	ENCFF785ACI	bed narrowPeak	optimal IDR thresholded peaks	hg19	K562
TRIM28	ENCFF002CXA	bed narrowPeak	optimal IDR thresholded peaks	hg19	K562
TRIM28	ENCFF591BIT	bed narrowPeak	optimal IDR thresholded peaks	hg19	K562
STAT1	ENCFF002CYD	bed narrowPeak	optimal IDR thresholded peaks	hg19	K562
STAT1	ENCFF498DOQ	bed narrowPeak	optimal IDR thresholded peaks	hg19	K562
USF1	ENCFF002CMV	bed narrowPeak	optimal IDR thresholded peaks	hg19	K562
USF1	ENCFF334FMW	bed narrowPeak	optimal IDR thresholded peaks	hg19	K562
KDM5B	ENCFF002CES	bed narrowPeak	optimal IDR thresholded peaks	hg19	K562
KDM5B	ENCFF368TYM	bed narrowPeak	optimal IDR thresholded peaks	hg19	K562
BDP1	ENCFF002CVP	bed narrowPeak	optimal IDR thresholded peaks	hg19	K562
GATA2	ENCFF002CWQ	bed narrowPeak	optimal IDR thresholded peaks	hg19	K562
GATA2	ENCFF732HOE	bed narrowPeak	optimal IDR thresholded peaks	hg19	K562
E2F4	ENCFF002CWM	bed narrowPeak	optimal IDR thresholded peaks	hg19	K562
CTCF	ENCFF002DBD	bed narrowPeak	optimal IDR thresholded peaks	hg19	K562
GABPA	ENCFF002CLZ	bed narrowPeak	optimal IDR thresholded peaks	hg19	K562
GABPA	ENCFF833FCO	bed narrowPeak	optimal IDR thresholded peaks	hg19	K562
HNRNPK	ENCFF777CWV	bed narrowPeak	optimal IDR thresholded peaks	hg19	K562
NR2F2	ENCFF002CME	bed narrowPeak	optimal IDR thresholded peaks	hg19	K562
NR2F2	ENCFF255EOB	bed narrowPeak	optimal IDR thresholded peaks	hg19	K562
U2AF1	ENCFF730URE	bed narrowPeak	optimal IDR thresholded peaks	hg19	K562
NRF1	ENCFF002CXK	bed narrowPeak	optimal IDR thresholded peaks	hg19	K562
JUND	ENCFF002CWZ	bed narrowPeak	optimal IDR thresholded peaks	hg19	K562
JUND	ENCFF337DKJ	bed narrowPeak	optimal IDR thresholded peaks	hg19	K562
SMC3	ENCFF002CYA	bed narrowPeak	optimal IDR thresholded peaks	hg19	K562
SMC3	ENCFF041YQC	bed narrowPeak	optimal IDR thresholded peaks	hg19	K562
PCBP1	ENCFF941RVL	bed narrowPeak	optimal IDR thresholded peaks	hg19	K562
MYC	ENCFF002CWF	bed narrowPeak	optimal IDR thresholded peaks	hg19	K562
MYC	ENCFF676YJE	bed narrowPeak	optimal IDR thresholded peaks	hg19	K562
CEBPB	ENCFF002CVV	bed narrowPeak	optimal IDR thresholded peaks	hg19	K562
CEBPB	ENCFF429XKT	bed narrowPeak	optimal IDR thresholded peaks	hg19	K562
MEF2A	ENCFF002CMD	bed narrowPeak	optimal IDR thresholded peaks	hg19	K562
MEF2A	ENCFF577UJR	bed narrowPeak	optimal IDR thresholded peaks	hg19	K562
BHLHE40	ENCFF002CVQ	bed narrowPeak	optimal IDR thresholded peaks	hg19	K562
BHLHE40	ENCFF179NDS	bed narrowPeak	optimal IDR thresholded peaks	hg19	K562
SAP30	ENCFF002CEV	bed narrowPeak	optimal IDR thresholded peaks	hg19	K562
SAP30	ENCFF718NUA	bed narrowPeak	optimal IDR thresholded peaks	hg19	K562
MAX	ENCFF002CMC	bed narrowPeak	optimal IDR thresholded peaks	hg19	K562
MAX	ENCFF422NGZ	bed narrowPeak	optimal IDR thresholded peaks	hg19	K562
USF2	ENCFF002CYP	bed narrowPeak	optimal IDR thresholded peaks	hg19	K562
USF2	ENCFF150VTD	bed narrowPeak	optimal IDR thresholded peaks	hg19	K562
eGFP-HDAC8	ENCFF002DDX	bed narrowPeak	optimal IDR thresholded peaks	hg19	K562
eGFP-HDAC8	ENCFF833KXP	bed narrowPeak	optimal IDR thresholded peaks	hg19	K562
NFYA	ENCFF002CXI	bed narrowPeak	optimal IDR thresholded peaks	hg19	K562
NFYA	ENCFF012VES	bed narrowPeak	optimal IDR thresholded peaks	hg19	K562
ZNF143	ENCFF002CYR	bed narrowPeak	optimal IDR thresholded peaks	hg19	K562
ZNF143	ENCFF114IWY	bed narrowPeak	optimal IDR thresholded peaks	hg19	K562
SPI1	ENCFF002CMJ	bed narrowPeak	optimal IDR thresholded peaks	hg19	K562
SPI1	ENCFF664XPS	bed narrowPeak	optimal IDR thresholded peaks	hg19	K562
EGR1	ENCFF002CLV	bed narrowPeak	optimal IDR thresholded peaks	hg19	K562
EGR1	ENCFF182QDI	bed narrowPeak	optimal IDR thresholded peaks	hg19	K562
MYC	ENCFF002CWG	bed narrowPeak	optimal IDR thresholded peaks	hg19	K562
MYC	ENCFF099SDW	bed narrowPeak	optimal IDR thresholded peaks	hg19	K562
MYC	ENCFF002CWD	bed narrowPeak	optimal IDR thresholded peaks	hg19	K562
MYC	ENCFF634AYU	bed narrowPeak	optimal IDR thresholded peaks	hg19	K562
HNRNPH1	ENCFF292JRY	bed narrowPeak	optimal IDR thresholded peaks	hg19	K562
JUN	ENCFF002CWC	bed narrowPeak	optimal IDR thresholded peaks	hg19	K562
RCOR1	ENCFF002CWK	bed narrowPeak	optimal IDR thresholded peaks	hg19	K562
FOS	ENCFF002CVW	bed narrowPeak	optimal IDR thresholded peaks	hg19	K562
TEAD4	ENCFF002CMT	bed narrowPeak	optimal IDR thresholded peaks	hg19	K562
TEAD4	ENCFF209MQX	bed narrowPeak	optimal IDR thresholded peaks	hg19	K562

## Sheet: S1C
TF_Name	File accession	File format	Output type	File download URL	Biosample term name
TARDBP	ENCFF530LSA	bed narrowPeak	optimal IDR thresholded peaks	https://www.encodeproject.org/files/ENCFF530LSA/@@download/ENCFF530LSA.bed.gz	HepG2
TARDBP	ENCFF843YBE	bed narrowPeak	conservative IDR thresholded peaks	https://www.encodeproject.org/files/ENCFF843YBE/@@download/ENCFF843YBE.bed.gz	HepG2
SRSF1	ENCFF524VYB	bed narrowPeak	conservative IDR thresholded peaks	https://www.encodeproject.org/files/ENCFF524VYB/@@download/ENCFF524VYB.bed.gz	HepG2
SRSF1	ENCFF046BRA	bed narrowPeak	optimal IDR thresholded peaks	https://www.encodeproject.org/files/ENCFF046BRA/@@download/ENCFF046BRA.bed.gz	HepG2
SMARCE1	ENCFF755URS	bed narrowPeak	conservative IDR thresholded peaks	https://www.encodeproject.org/files/ENCFF755URS/@@download/ENCFF755URS.bed.gz	HepG2
SMARCE1	ENCFF743GXH	bed narrowPeak	optimal IDR thresholded peaks	https://www.encodeproject.org/files/ENCFF743GXH/@@download/ENCFF743GXH.bed.gz	HepG2
HNRNPUL1	ENCFF373QRK	bed narrowPeak	conservative IDR thresholded peaks	https://www.encodeproject.org/files/ENCFF373QRK/@@download/ENCFF373QRK.bed.gz	HepG2
HNRNPUL1	ENCFF560CMG	bed narrowPeak	optimal IDR thresholded peaks	https://www.encodeproject.org/files/ENCFF560CMG/@@download/ENCFF560CMG.bed.gz	HepG2
POLR2A	ENCFF002CUQ	bed narrowPeak	optimal IDR thresholded peaks	https://www.encodeproject.org/files/ENCFF002CUQ/@@download/ENCFF002CUQ.bed.gz	HepG2
CEBPZ	ENCFF208AFB	bed narrowPeak	optimal IDR thresholded peaks	https://www.encodeproject.org/files/ENCFF208AFB/@@download/ENCFF208AFB.bed.gz	HepG2
CEBPZ	ENCFF684MOG	bed narrowPeak	conservative IDR thresholded peaks	https://www.encodeproject.org/files/ENCFF684MOG/@@download/ENCFF684MOG.bed.gz	HepG2
RCOR1	ENCFF002CTZ	bed narrowPeak	optimal IDR thresholded peaks	https://www.encodeproject.org/files/ENCFF002CTZ/@@download/ENCFF002CTZ.bed.gz	HepG2
RCOR1	ENCFF706RIA	bed narrowPeak	optimal IDR thresholded peaks	https://www.encodeproject.org/files/ENCFF706RIA/@@download/ENCFF706RIA.bed.gz	HepG2
RCOR1	ENCFF298ESK	bed narrowPeak	conservative IDR thresholded peaks	https://www.encodeproject.org/files/ENCFF298ESK/@@download/ENCFF298ESK.bed.gz	HepG2
SMARCC2	ENCFF840XVN	bed narrowPeak	conservative IDR thresholded peaks	https://www.encodeproject.org/files/ENCFF840XVN/@@download/ENCFF840XVN.bed.gz	HepG2
SMARCC2	ENCFF038MCY	bed narrowPeak	optimal IDR thresholded peaks	https://www.encodeproject.org/files/ENCFF038MCY/@@download/ENCFF038MCY.bed.gz	HepG2
EZH2	ENCFF002CEA	bed narrowPeak	optimal IDR thresholded peaks	https://www.encodeproject.org/files/ENCFF002CEA/@@download/ENCFF002CEA.bed.gz	HepG2
EZH2	ENCFF493FED	bed narrowPeak	optimal IDR thresholded peaks	https://www.encodeproject.org/files/ENCFF493FED/@@download/ENCFF493FED.bed.gz	HepG2
MXI1	ENCFF002CUL	bed narrowPeak	optimal IDR thresholded peaks	https://www.encodeproject.org/files/ENCFF002CUL/@@download/ENCFF002CUL.bed.gz	HepG2
MNT	ENCFF763GJP	bed narrowPeak	optimal IDR thresholded peaks	https://www.encodeproject.org/files/ENCFF763GJP/@@download/ENCFF763GJP.bed.gz	HepG2
MNT	ENCFF107CEH	bed narrowPeak	conservative IDR thresholded peaks	https://www.encodeproject.org/files/ENCFF107CEH/@@download/ENCFF107CEH.bed.gz	HepG2
ARNT	ENCFF357FTD	bed narrowPeak	conservative IDR thresholded peaks	https://www.encodeproject.org/files/ENCFF357FTD/@@download/ENCFF357FTD.bed.gz	HepG2
ARNT	ENCFF808WQI	bed narrowPeak	optimal IDR thresholded peaks	https://www.encodeproject.org/files/ENCFF808WQI/@@download/ENCFF808WQI.bed.gz	HepG2
RAD21	ENCFF002CUS	bed narrowPeak	optimal IDR thresholded peaks	https://www.encodeproject.org/files/ENCFF002CUS/@@download/ENCFF002CUS.bed.gz	HepG2
RAD21	ENCFF584YYH	bed narrowPeak	optimal IDR thresholded peaks	https://www.encodeproject.org/files/ENCFF584YYH/@@download/ENCFF584YYH.bed.gz	HepG2
RAD21	ENCFF903MXX	bed narrowPeak	conservative IDR thresholded peaks	https://www.encodeproject.org/files/ENCFF903MXX/@@download/ENCFF903MXX.bed.gz	HepG2
RBFOX2	ENCFF663YBI	bed narrowPeak	optimal IDR thresholded peaks	https://www.encodeproject.org/files/ENCFF663YBI/@@download/ENCFF663YBI.bed.gz	HepG2
RBFOX2	ENCFF390PNX	bed narrowPeak	conservative IDR thresholded peaks	https://www.encodeproject.org/files/ENCFF390PNX/@@download/ENCFF390PNX.bed.gz	HepG2
SFPQ	ENCFF922FRH	bed narrowPeak	optimal IDR thresholded peaks	https://www.encodeproject.org/files/ENCFF922FRH/@@download/ENCFF922FRH.bed.gz	HepG2
SFPQ	ENCFF692DSK	bed narrowPeak	conservative IDR thresholded peaks	https://www.encodeproject.org/files/ENCFF692DSK/@@download/ENCFF692DSK.bed.gz	HepG2
EP300	ENCFF002CKV	bed narrowPeak	optimal IDR thresholded peaks	https://www.encodeproject.org/files/ENCFF002CKV/@@download/ENCFF002CKV.bed.gz	HepG2
EP300	ENCFF547POU	bed narrowPeak	optimal IDR thresholded peaks	https://www.encodeproject.org/files/ENCFF547POU/@@download/ENCFF547POU.bed.gz	HepG2
EP300	ENCFF811CMJ	bed narrowPeak	conservative IDR thresholded peaks	https://www.encodeproject.org/files/ENCFF811CMJ/@@download/ENCFF811CMJ.bed.gz	HepG2
GTF2F1	ENCFF224MFN	bed narrowPeak	conservative IDR thresholded peaks	https://www.encodeproject.org/files/ENCFF224MFN/@@download/ENCFF224MFN.bed.gz	HepG2
GTF2F1	ENCFF095TYO	bed narrowPeak	optimal IDR thresholded peaks	https://www.encodeproject.org/files/ENCFF095TYO/@@download/ENCFF095TYO.bed.gz	HepG2
SNRNP70	ENCFF371FIK	bed narrowPeak	conservative IDR thresholded peaks	https://www.encodeproject.org/files/ENCFF371FIK/@@download/ENCFF371FIK.bed.gz	HepG2
SNRNP70	ENCFF337FIU	bed narrowPeak	optimal IDR thresholded peaks	https://www.encodeproject.org/files/ENCFF337FIU/@@download/ENCFF337FIU.bed.gz	HepG2
AGO1	ENCFF377SDH	bed narrowPeak	conservative IDR thresholded peaks	https://www.encodeproject.org/files/ENCFF377SDH/@@download/ENCFF377SDH.bed.gz	HepG2
AGO1	ENCFF639TOU	bed narrowPeak	optimal IDR thresholded peaks	https://www.encodeproject.org/files/ENCFF639TOU/@@download/ENCFF639TOU.bed.gz	HepG2
FUS	ENCFF950KWC	bed narrowPeak	optimal IDR thresholded peaks	https://www.encodeproject.org/files/ENCFF950KWC/@@download/ENCFF950KWC.bed.gz	HepG2
XRCC5	ENCFF837IBY	bed narrowPeak	conservative IDR thresholded peaks	https://www.encodeproject.org/files/ENCFF837IBY/@@download/ENCFF837IBY.bed.gz	HepG2
XRCC5	ENCFF845GIK	bed narrowPeak	optimal IDR thresholded peaks	https://www.encodeproject.org/files/ENCFF845GIK/@@download/ENCFF845GIK.bed.gz	HepG2
TOE1	ENCFF595PYC	bed narrowPeak	conservative IDR thresholded peaks	https://www.encodeproject.org/files/ENCFF595PYC/@@download/ENCFF595PYC.bed.gz	HepG2
TOE1	ENCFF341IOA	bed narrowPeak	optimal IDR thresholded peaks	https://www.encodeproject.org/files/ENCFF341IOA/@@download/ENCFF341IOA.bed.gz	HepG2
HNRNPLL	ENCFF026ZCX	bed narrowPeak	conservative IDR thresholded peaks	https://www.encodeproject.org/files/ENCFF026ZCX/@@download/ENCFF026ZCX.bed.gz	HepG2
HNRNPLL	ENCFF883CDF	bed narrowPeak	optimal IDR thresholded peaks	https://www.encodeproject.org/files/ENCFF883CDF/@@download/ENCFF883CDF.bed.gz	HepG2
HNRNPH1	ENCFF506GGI	bed narrowPeak	conservative IDR thresholded peaks	https://www.encodeproject.org/files/ENCFF506GGI/@@download/ENCFF506GGI.bed.gz	HepG2
HNRNPH1	ENCFF937MYV	bed narrowPeak	optimal IDR thresholded peaks	https://www.encodeproject.org/files/ENCFF937MYV/@@download/ENCFF937MYV.bed.gz	HepG2
HNRNPL	ENCFF866NDX	bed narrowPeak	conservative IDR thresholded peaks	https://www.encodeproject.org/files/ENCFF866NDX/@@download/ENCFF866NDX.bed.gz	HepG2
HNRNPL	ENCFF233MID	bed narrowPeak	optimal IDR thresholded peaks	https://www.encodeproject.org/files/ENCFF233MID/@@download/ENCFF233MID.bed.gz	HepG2
ZNF24	ENCFF217YYT	bed narrowPeak	conservative IDR thresholded peaks	https://www.encodeproject.org/files/ENCFF217YYT/@@download/ENCFF217YYT.bed.gz	HepG2
ZNF24	ENCFF443EYO	bed narrowPeak	optimal IDR thresholded peaks	https://www.encodeproject.org/files/ENCFF443EYO/@@download/ENCFF443EYO.bed.gz	HepG2
TCF12	ENCFF606PZE	bed narrowPeak	conservative IDR thresholded peaks	https://www.encodeproject.org/files/ENCFF606PZE/@@download/ENCFF606PZE.bed.gz	HepG2
TCF12	ENCFF949EAE	bed narrowPeak	optimal IDR thresholded peaks	https://www.encodeproject.org/files/ENCFF949EAE/@@download/ENCFF949EAE.bed.gz	HepG2
BCLAF1	ENCFF052YIL	bed narrowPeak	optimal IDR thresholded peaks	https://www.encodeproject.org/files/ENCFF052YIL/@@download/ENCFF052YIL.bed.gz	HepG2
BCLAF1	ENCFF413KUZ	bed narrowPeak	conservative IDR thresholded peaks	https://www.encodeproject.org/files/ENCFF413KUZ/@@download/ENCFF413KUZ.bed.gz	HepG2
MAX	ENCFF002CUJ	bed narrowPeak	optimal IDR thresholded peaks	https://www.encodeproject.org/files/ENCFF002CUJ/@@download/ENCFF002CUJ.bed.gz	HepG2
MAX	ENCFF999ZXB	bed narrowPeak	conservative IDR thresholded peaks	https://www.encodeproject.org/files/ENCFF999ZXB/@@download/ENCFF999ZXB.bed.gz	HepG2
MAX	ENCFF922GRD	bed narrowPeak	optimal IDR thresholded peaks	https://www.encodeproject.org/files/ENCFF922GRD/@@download/ENCFF922GRD.bed.gz	HepG2
FOSL2	ENCFF002CKH	bed narrowPeak	optimal IDR thresholded peaks	https://www.encodeproject.org/files/ENCFF002CKH/@@download/ENCFF002CKH.bed.gz	HepG2
FOSL2	ENCFF395KPJ	bed narrowPeak	optimal IDR thresholded peaks	https://www.encodeproject.org/files/ENCFF395KPJ/@@download/ENCFF395KPJ.bed.gz	HepG2
FOSL2	ENCFF105NJB	bed narrowPeak	conservative IDR thresholded peaks	https://www.encodeproject.org/files/ENCFF105NJB/@@download/ENCFF105NJB.bed.gz	HepG2
CEBPB	ENCFF002CTW	bed narrowPeak	optimal IDR thresholded peaks	https://www.encodeproject.org/files/ENCFF002CTW/@@download/ENCFF002CTW.bed.gz	HepG2
CEBPB	ENCFF319IEF	bed narrowPeak	optimal IDR thresholded peaks	https://www.encodeproject.org/files/ENCFF319IEF/@@download/ENCFF319IEF.bed.gz	HepG2
CEBPB	ENCFF419CGD	bed narrowPeak	conservative IDR thresholded peaks	https://www.encodeproject.org/files/ENCFF419CGD/@@download/ENCFF419CGD.bed.gz	HepG2
JUND	ENCFF002CUF	bed narrowPeak	optimal IDR thresholded peaks	https://www.encodeproject.org/files/ENCFF002CUF/@@download/ENCFF002CUF.bed.gz	HepG2
JUND	ENCFF596XCU	bed narrowPeak	conservative IDR thresholded peaks	https://www.encodeproject.org/files/ENCFF596XCU/@@download/ENCFF596XCU.bed.gz	HepG2
JUND	ENCFF085GOJ	bed narrowPeak	optimal IDR thresholded peaks	https://www.encodeproject.org/files/ENCFF085GOJ/@@download/ENCFF085GOJ.bed.gz	HepG2
RFX5	ENCFF002CUT	bed narrowPeak	optimal IDR thresholded peaks	https://www.encodeproject.org/files/ENCFF002CUT/@@download/ENCFF002CUT.bed.gz	HepG2
RFX5	ENCFF645MNT	bed narrowPeak	conservative IDR thresholded peaks	https://www.encodeproject.org/files/ENCFF645MNT/@@download/ENCFF645MNT.bed.gz	HepG2
RFX5	ENCFF933GHY	bed narrowPeak	optimal IDR thresholded peaks	https://www.encodeproject.org/files/ENCFF933GHY/@@download/ENCFF933GHY.bed.gz	HepG2
MAFK	ENCFF002CUI	bed narrowPeak	optimal IDR thresholded peaks	https://www.encodeproject.org/files/ENCFF002CUI/@@download/ENCFF002CUI.bed.gz	HepG2
MAFK	ENCFF569VYO	bed narrowPeak	conservative IDR thresholded peaks	https://www.encodeproject.org/files/ENCFF569VYO/@@download/ENCFF569VYO.bed.gz	HepG2
MAFK	ENCFF800XTT	bed narrowPeak	optimal IDR thresholded peaks	https://www.encodeproject.org/files/ENCFF800XTT/@@download/ENCFF800XTT.bed.gz	HepG2
NR2C2	ENCFF002CUY	bed narrowPeak	optimal IDR thresholded peaks	https://www.encodeproject.org/files/ENCFF002CUY/@@download/ENCFF002CUY.bed.gz	HepG2
NFE2L2	ENCFF297BXM	bed narrowPeak	optimal IDR thresholded peaks	https://www.encodeproject.org/files/ENCFF297BXM/@@download/ENCFF297BXM.bed.gz	HepG2
NFE2L2	ENCFF266HXY	bed narrowPeak	conservative IDR thresholded peaks	https://www.encodeproject.org/files/ENCFF266HXY/@@download/ENCFF266HXY.bed.gz	HepG2
NFE2L2	ENCFF928POR	bed narrowPeak	optimal IDR thresholded peaks	https://www.encodeproject.org/files/ENCFF928POR/@@download/ENCFF928POR.bed.gz	HepG2
NFE2L2	ENCFF261EFH	bed narrowPeak	conservative IDR thresholded peaks	https://www.encodeproject.org/files/ENCFF261EFH/@@download/ENCFF261EFH.bed.gz	HepG2
RXRA	ENCFF002CKZ	bed narrowPeak	optimal IDR thresholded peaks	https://www.encodeproject.org/files/ENCFF002CKZ/@@download/ENCFF002CKZ.bed.gz	HepG2
RXRA	ENCFF964JXI	bed narrowPeak	optimal IDR thresholded peaks	https://www.encodeproject.org/files/ENCFF964JXI/@@download/ENCFF964JXI.bed.gz	HepG2
RXRA	ENCFF799DNN	bed narrowPeak	conservative IDR thresholded peaks	https://www.encodeproject.org/files/ENCFF799DNN/@@download/ENCFF799DNN.bed.gz	HepG2
TBL1XR1	ENCFF144VBS	bed narrowPeak	conservative IDR thresholded peaks	https://www.encodeproject.org/files/ENCFF144VBS/@@download/ENCFF144VBS.bed.gz	HepG2
TBL1XR1	ENCFF424KTS	bed narrowPeak	optimal IDR thresholded peaks	https://www.encodeproject.org/files/ENCFF424KTS/@@download/ENCFF424KTS.bed.gz	HepG2
ATF7	ENCFF510UKU	bed narrowPeak	conservative IDR thresholded peaks	https://www.encodeproject.org/files/ENCFF510UKU/@@download/ENCFF510UKU.bed.gz	HepG2
ATF7	ENCFF658YLW	bed narrowPeak	optimal IDR thresholded peaks	https://www.encodeproject.org/files/ENCFF658YLW/@@download/ENCFF658YLW.bed.gz	HepG2
JUN	ENCFF002CTY	bed narrowPeak	optimal IDR thresholded peaks	https://www.encodeproject.org/files/ENCFF002CTY/@@download/ENCFF002CTY.bed.gz	HepG2
JUN	ENCFF916SBW	bed narrowPeak	conservative IDR thresholded peaks	https://www.encodeproject.org/files/ENCFF916SBW/@@download/ENCFF916SBW.bed.gz	HepG2
JUN	ENCFF121UYS	bed narrowPeak	optimal IDR thresholded peaks	https://www.encodeproject.org/files/ENCFF121UYS/@@download/ENCFF121UYS.bed.gz	HepG2
YBX1	ENCFF566DXN	bed narrowPeak	conservative IDR thresholded peaks	https://www.encodeproject.org/files/ENCFF566DXN/@@download/ENCFF566DXN.bed.gz	HepG2
YBX1	ENCFF920LEU	bed narrowPeak	optimal IDR thresholded peaks	https://www.encodeproject.org/files/ENCFF920LEU/@@download/ENCFF920LEU.bed.gz	HepG2
BHLHE40	ENCFF002CTT	bed narrowPeak	optimal IDR thresholded peaks	https://www.encodeproject.org/files/ENCFF002CTT/@@download/ENCFF002CTT.bed.gz	HepG2
BHLHE40	ENCFF502XEV	bed narrowPeak	conservative IDR thresholded peaks	https://www.encodeproject.org/files/ENCFF502XEV/@@download/ENCFF502XEV.bed.gz	HepG2
BHLHE40	ENCFF108RWG	bed narrowPeak	optimal IDR thresholded peaks	https://www.encodeproject.org/files/ENCFF108RWG/@@download/ENCFF108RWG.bed.gz	HepG2
GTF2F1	ENCFF971ARX	bed narrowPeak	conservative IDR thresholded peaks	https://www.encodeproject.org/files/ENCFF971ARX/@@download/ENCFF971ARX.bed.gz	HepG2
GTF2F1	ENCFF699VTO	bed narrowPeak	optimal IDR thresholded peaks	https://www.encodeproject.org/files/ENCFF699VTO/@@download/ENCFF699VTO.bed.gz	HepG2
GTF2F1	ENCFF694UJI	bed narrowPeak	optimal IDR thresholded peaks	https://www.encodeproject.org/files/ENCFF694UJI/@@download/ENCFF694UJI.bed.gz	HepG2
GTF2F1	ENCFF424MNR	bed narrowPeak	conservative IDR thresholded peaks	https://www.encodeproject.org/files/ENCFF424MNR/@@download/ENCFF424MNR.bed.gz	HepG2
NFRKB	ENCFF862BRX	bed narrowPeak	conservative IDR thresholded peaks	https://www.encodeproject.org/files/ENCFF862BRX/@@download/ENCFF862BRX.bed.gz	HepG2
NFRKB	ENCFF132QLW	bed narrowPeak	optimal IDR thresholded peaks	https://www.encodeproject.org/files/ENCFF132QLW/@@download/ENCFF132QLW.bed.gz	HepG2
CBX2	ENCFF209ALR	bed narrowPeak	conservative IDR thresholded peaks	https://www.encodeproject.org/files/ENCFF209ALR/@@download/ENCFF209ALR.bed.gz	HepG2
CBX2	ENCFF928KZS	bed narrowPeak	optimal IDR thresholded peaks	https://www.encodeproject.org/files/ENCFF928KZS/@@download/ENCFF928KZS.bed.gz	HepG2
NCOR1	ENCFF033BDT	bed narrowPeak	optimal IDR thresholded peaks	https://www.encodeproject.org/files/ENCFF033BDT/@@download/ENCFF033BDT.bed.gz	HepG2
NCOR1	ENCFF193YSE	bed narrowPeak	conservative IDR thresholded peaks	https://www.encodeproject.org/files/ENCFF193YSE/@@download/ENCFF193YSE.bed.gz	HepG2
EHMT2	ENCFF234MZM	bed narrowPeak	conservative IDR thresholded peaks	https://www.encodeproject.org/files/ENCFF234MZM/@@download/ENCFF234MZM.bed.gz	HepG2
EHMT2	ENCFF609YST	bed narrowPeak	optimal IDR thresholded peaks	https://www.encodeproject.org/files/ENCFF609YST/@@download/ENCFF609YST.bed.gz	HepG2
PLRG1	ENCFF926QHU	bed narrowPeak	conservative IDR thresholded peaks	https://www.encodeproject.org/files/ENCFF926QHU/@@download/ENCFF926QHU.bed.gz	HepG2
PLRG1	ENCFF276GUV	bed narrowPeak	optimal IDR thresholded peaks	https://www.encodeproject.org/files/ENCFF276GUV/@@download/ENCFF276GUV.bed.gz	HepG2
ZFP36	ENCFF881THB	bed narrowPeak	conservative IDR thresholded peaks	https://www.encodeproject.org/files/ENCFF881THB/@@download/ENCFF881THB.bed.gz	HepG2
ZFP36	ENCFF906IMT	bed narrowPeak	optimal IDR thresholded peaks	https://www.encodeproject.org/files/ENCFF906IMT/@@download/ENCFF906IMT.bed.gz	HepG2
ETS1	ENCFF653JVV	bed narrowPeak	conservative IDR thresholded peaks	https://www.encodeproject.org/files/ENCFF653JVV/@@download/ENCFF653JVV.bed.gz	HepG2
ETS1	ENCFF244ORA	bed narrowPeak	optimal IDR thresholded peaks	https://www.encodeproject.org/files/ENCFF244ORA/@@download/ENCFF244ORA.bed.gz	HepG2
SOX6	ENCFF425UQS	bed narrowPeak	conservative IDR thresholded peaks	https://www.encodeproject.org/files/ENCFF425UQS/@@download/ENCFF425UQS.bed.gz	HepG2
SOX6	ENCFF432DIT	bed narrowPeak	optimal IDR thresholded peaks	https://www.encodeproject.org/files/ENCFF432DIT/@@download/ENCFF432DIT.bed.gz	HepG2
HNF1A	ENCFF044GIB	bed narrowPeak	conservative IDR thresholded peaks	https://www.encodeproject.org/files/ENCFF044GIB/@@download/ENCFF044GIB.bed.gz	HepG2
HNF1A	ENCFF227PWE	bed narrowPeak	optimal IDR thresholded peaks	https://www.encodeproject.org/files/ENCFF227PWE/@@download/ENCFF227PWE.bed.gz	HepG2
ZBTB33	ENCFF557KGA	bed narrowPeak	optimal IDR thresholded peaks	https://www.encodeproject.org/files/ENCFF557KGA/@@download/ENCFF557KGA.bed.gz	HepG2
ZBTB33	ENCFF697VUK	bed narrowPeak	conservative IDR thresholded peaks	https://www.encodeproject.org/files/ENCFF697VUK/@@download/ENCFF697VUK.bed.gz	HepG2
ATF2	ENCFF502ZTC	bed narrowPeak	optimal IDR thresholded peaks	https://www.encodeproject.org/files/ENCFF502ZTC/@@download/ENCFF502ZTC.bed.gz	HepG2
ATF2	ENCFF215TZZ	bed narrowPeak	conservative IDR thresholded peaks	https://www.encodeproject.org/files/ENCFF215TZZ/@@download/ENCFF215TZZ.bed.gz	HepG2
ZNF282	ENCFF672RYT	bed narrowPeak	conservative IDR thresholded peaks	https://www.encodeproject.org/files/ENCFF672RYT/@@download/ENCFF672RYT.bed.gz	HepG2
ZNF282	ENCFF266KSD	bed narrowPeak	optimal IDR thresholded peaks	https://www.encodeproject.org/files/ENCFF266KSD/@@download/ENCFF266KSD.bed.gz	HepG2
NR2F6	ENCFF487OSZ	bed narrowPeak	conservative IDR thresholded peaks	https://www.encodeproject.org/files/ENCFF487OSZ/@@download/ENCFF487OSZ.bed.gz	HepG2
NR2F6	ENCFF311LEU	bed narrowPeak	optimal IDR thresholded peaks	https://www.encodeproject.org/files/ENCFF311LEU/@@download/ENCFF311LEU.bed.gz	HepG2
POLR2G	ENCFF733YFT	bed narrowPeak	conservative IDR thresholded peaks	https://www.encodeproject.org/files/ENCFF733YFT/@@download/ENCFF733YFT.bed.gz	HepG2
POLR2G	ENCFF259XQC	bed narrowPeak	optimal IDR thresholded peaks	https://www.encodeproject.org/files/ENCFF259XQC/@@download/ENCFF259XQC.bed.gz	HepG2
ETV4	ENCFF816PYF	bed narrowPeak	conservative IDR thresholded peaks	https://www.encodeproject.org/files/ENCFF816PYF/@@download/ENCFF816PYF.bed.gz	HepG2
ETV4	ENCFF076NCP	bed narrowPeak	optimal IDR thresholded peaks	https://www.encodeproject.org/files/ENCFF076NCP/@@download/ENCFF076NCP.bed.gz	HepG2
CREB1	ENCFF835UPN	bed narrowPeak	conservative IDR thresholded peaks	https://www.encodeproject.org/files/ENCFF835UPN/@@download/ENCFF835UPN.bed.gz	HepG2
CREB1	ENCFF161PGD	bed narrowPeak	optimal IDR thresholded peaks	https://www.encodeproject.org/files/ENCFF161PGD/@@download/ENCFF161PGD.bed.gz	HepG2
MAZ	ENCFF002CUK	bed narrowPeak	optimal IDR thresholded peaks	https://www.encodeproject.org/files/ENCFF002CUK/@@download/ENCFF002CUK.bed.gz	HepG2
MAZ	ENCFF762QHA	bed narrowPeak	conservative IDR thresholded peaks	https://www.encodeproject.org/files/ENCFF762QHA/@@download/ENCFF762QHA.bed.gz	HepG2
MAZ	ENCFF421SEJ	bed narrowPeak	optimal IDR thresholded peaks	https://www.encodeproject.org/files/ENCFF421SEJ/@@download/ENCFF421SEJ.bed.gz	HepG2
ZNF207	ENCFF139NXQ	bed narrowPeak	conservative IDR thresholded peaks	https://www.encodeproject.org/files/ENCFF139NXQ/@@download/ENCFF139NXQ.bed.gz	HepG2
ZNF207	ENCFF556DEP	bed narrowPeak	optimal IDR thresholded peaks	https://www.encodeproject.org/files/ENCFF556DEP/@@download/ENCFF556DEP.bed.gz	HepG2
HOMEZ	ENCFF550OPR	bed narrowPeak	conservative IDR thresholded peaks	https://www.encodeproject.org/files/ENCFF550OPR/@@download/ENCFF550OPR.bed.gz	HepG2
HOMEZ	ENCFF181UHL	bed narrowPeak	optimal IDR thresholded peaks	https://www.encodeproject.org/files/ENCFF181UHL/@@download/ENCFF181UHL.bed.gz	HepG2
TCF12	ENCFF002CLF	bed narrowPeak	optimal IDR thresholded peaks	https://www.encodeproject.org/files/ENCFF002CLF/@@download/ENCFF002CLF.bed.gz	HepG2
TCF12	ENCFF997NWM	bed narrowPeak	conservative IDR thresholded peaks	https://www.encodeproject.org/files/ENCFF997NWM/@@download/ENCFF997NWM.bed.gz	HepG2
TCF12	ENCFF940BIM	bed narrowPeak	optimal IDR thresholded peaks	https://www.encodeproject.org/files/ENCFF940BIM/@@download/ENCFF940BIM.bed.gz	HepG2
SOX5	ENCFF942TIQ	bed narrowPeak	conservative IDR thresholded peaks	https://www.encodeproject.org/files/ENCFF942TIQ/@@download/ENCFF942TIQ.bed.gz	HepG2
SOX5	ENCFF095KWQ	bed narrowPeak	optimal IDR thresholded peaks	https://www.encodeproject.org/files/ENCFF095KWQ/@@download/ENCFF095KWQ.bed.gz	HepG2
BCL6	ENCFF614HYY	bed narrowPeak	conservative IDR thresholded peaks	https://www.encodeproject.org/files/ENCFF614HYY/@@download/ENCFF614HYY.bed.gz	HepG2
BCL6	ENCFF396GKZ	bed narrowPeak	optimal IDR thresholded peaks	https://www.encodeproject.org/files/ENCFF396GKZ/@@download/ENCFF396GKZ.bed.gz	HepG2
RERE	ENCFF200FKG	bed narrowPeak	conservative IDR thresholded peaks	https://www.encodeproject.org/files/ENCFF200FKG/@@download/ENCFF200FKG.bed.gz	HepG2
RERE	ENCFF763VWE	bed narrowPeak	optimal IDR thresholded peaks	https://www.encodeproject.org/files/ENCFF763VWE/@@download/ENCFF763VWE.bed.gz	HepG2
HNF4G	ENCFF002CKO	bed narrowPeak	optimal IDR thresholded peaks	https://www.encodeproject.org/files/ENCFF002CKO/@@download/ENCFF002CKO.bed.gz	HepG2
HNF4G	ENCFF267YOX	bed narrowPeak	conservative IDR thresholded peaks	https://www.encodeproject.org/files/ENCFF267YOX/@@download/ENCFF267YOX.bed.gz	HepG2
HNF4G	ENCFF140ARE	bed narrowPeak	optimal IDR thresholded peaks	https://www.encodeproject.org/files/ENCFF140ARE/@@download/ENCFF140ARE.bed.gz	HepG2
TFE3	ENCFF568BTO	bed narrowPeak	conservative IDR thresholded peaks	https://www.encodeproject.org/files/ENCFF568BTO/@@download/ENCFF568BTO.bed.gz	HepG2
TFE3	ENCFF765HCW	bed narrowPeak	optimal IDR thresholded peaks	https://www.encodeproject.org/files/ENCFF765HCW/@@download/ENCFF765HCW.bed.gz	HepG2
KLF11	ENCFF017EEZ	bed narrowPeak	conservative IDR thresholded peaks	https://www.encodeproject.org/files/ENCFF017EEZ/@@download/ENCFF017EEZ.bed.gz	HepG2
KLF11	ENCFF070BHP	bed narrowPeak	optimal IDR thresholded peaks	https://www.encodeproject.org/files/ENCFF070BHP/@@download/ENCFF070BHP.bed.gz	HepG2
CREB1	ENCFF639VNB	bed narrowPeak	conservative IDR thresholded peaks	https://www.encodeproject.org/files/ENCFF639VNB/@@download/ENCFF639VNB.bed.gz	HepG2
CREB1	ENCFF874EVS	bed narrowPeak	optimal IDR thresholded peaks	https://www.encodeproject.org/files/ENCFF874EVS/@@download/ENCFF874EVS.bed.gz	HepG2
ELF3	ENCFF066MGX	bed narrowPeak	conservative IDR thresholded peaks	https://www.encodeproject.org/files/ENCFF066MGX/@@download/ENCFF066MGX.bed.gz	HepG2
ELF3	ENCFF212ODH	bed narrowPeak	optimal IDR thresholded peaks	https://www.encodeproject.org/files/ENCFF212ODH/@@download/ENCFF212ODH.bed.gz	HepG2
RARA	ENCFF489SNI	bed narrowPeak	conservative IDR thresholded peaks	https://www.encodeproject.org/files/ENCFF489SNI/@@download/ENCFF489SNI.bed.gz	HepG2
RARA	ENCFF190IKA	bed narrowPeak	optimal IDR thresholded peaks	https://www.encodeproject.org/files/ENCFF190IKA/@@download/ENCFF190IKA.bed.gz	HepG2
BHLHE40	ENCFF002CKC	bed narrowPeak	optimal IDR thresholded peaks	https://www.encodeproject.org/files/ENCFF002CKC/@@download/ENCFF002CKC.bed.gz	HepG2
BHLHE40	ENCFF028BDC	bed narrowPeak	optimal IDR thresholded peaks	https://www.encodeproject.org/files/ENCFF028BDC/@@download/ENCFF028BDC.bed.gz	HepG2
BHLHE40	ENCFF252DIG	bed narrowPeak	conservative IDR thresholded peaks	https://www.encodeproject.org/files/ENCFF252DIG/@@download/ENCFF252DIG.bed.gz	HepG2
ERF	ENCFF392RQB	bed narrowPeak	conservative IDR thresholded peaks	https://www.encodeproject.org/files/ENCFF392RQB/@@download/ENCFF392RQB.bed.gz	HepG2
ERF	ENCFF998NID	bed narrowPeak	optimal IDR thresholded peaks	https://www.encodeproject.org/files/ENCFF998NID/@@download/ENCFF998NID.bed.gz	HepG2
ATF1	ENCFF843PZW	bed narrowPeak	conservative IDR thresholded peaks	https://www.encodeproject.org/files/ENCFF843PZW/@@download/ENCFF843PZW.bed.gz	HepG2
ATF1	ENCFF418WDR	bed narrowPeak	optimal IDR thresholded peaks	https://www.encodeproject.org/files/ENCFF418WDR/@@download/ENCFF418WDR.bed.gz	HepG2
AHR	ENCFF841GUR	bed narrowPeak	conservative IDR thresholded peaks	https://www.encodeproject.org/files/ENCFF841GUR/@@download/ENCFF841GUR.bed.gz	HepG2
AHR	ENCFF763XLN	bed narrowPeak	optimal IDR thresholded peaks	https://www.encodeproject.org/files/ENCFF763XLN/@@download/ENCFF763XLN.bed.gz	HepG2
RAD21	ENCFF241KRI	bed narrowPeak	conservative IDR thresholded peaks	https://www.encodeproject.org/files/ENCFF241KRI/@@download/ENCFF241KRI.bed.gz	HepG2
RAD21	ENCFF734ALE	bed narrowPeak	optimal IDR thresholded peaks	https://www.encodeproject.org/files/ENCFF734ALE/@@download/ENCFF734ALE.bed.gz	HepG2
TCF7L2	ENCFF002CUX	bed narrowPeak	optimal IDR thresholded peaks	https://www.encodeproject.org/files/ENCFF002CUX/@@download/ENCFF002CUX.bed.gz	HepG2
ZNF652	ENCFF004UHW	bed narrowPeak	conservative IDR thresholded peaks	https://www.encodeproject.org/files/ENCFF004UHW/@@download/ENCFF004UHW.bed.gz	HepG2
ZNF652	ENCFF115RUG	bed narrowPeak	optimal IDR thresholded peaks	https://www.encodeproject.org/files/ENCFF115RUG/@@download/ENCFF115RUG.bed.gz	HepG2
KLF16	ENCFF025GBN	bed narrowPeak	conservative IDR thresholded peaks	https://www.encodeproject.org/files/ENCFF025GBN/@@download/ENCFF025GBN.bed.gz	HepG2
KLF16	ENCFF728XWA	bed narrowPeak	optimal IDR thresholded peaks	https://www.encodeproject.org/files/ENCFF728XWA/@@download/ENCFF728XWA.bed.gz	HepG2
SRF	ENCFF002CLD	bed narrowPeak	optimal IDR thresholded peaks	https://www.encodeproject.org/files/ENCFF002CLD/@@download/ENCFF002CLD.bed.gz	HepG2
KAT2B	ENCFF913DIG	bed narrowPeak	conservative IDR thresholded peaks	https://www.encodeproject.org/files/ENCFF913DIG/@@download/ENCFF913DIG.bed.gz	HepG2
KAT2B	ENCFF405GHU	bed narrowPeak	optimal IDR thresholded peaks	https://www.encodeproject.org/files/ENCFF405GHU/@@download/ENCFF405GHU.bed.gz	HepG2
KAT2B	ENCFF025DVE	bed narrowPeak	conservative IDR thresholded peaks	https://www.encodeproject.org/files/ENCFF025DVE/@@download/ENCFF025DVE.bed.gz	HepG2
KAT2B	ENCFF054OUB	bed narrowPeak	optimal IDR thresholded peaks	https://www.encodeproject.org/files/ENCFF054OUB/@@download/ENCFF054OUB.bed.gz	HepG2
SMC3	ENCFF002CUU	bed narrowPeak	optimal IDR thresholded peaks	https://www.encodeproject.org/files/ENCFF002CUU/@@download/ENCFF002CUU.bed.gz	HepG2
SMC3	ENCFF525EJQ	bed narrowPeak	optimal IDR thresholded peaks	https://www.encodeproject.org/files/ENCFF525EJQ/@@download/ENCFF525EJQ.bed.gz	HepG2
SMC3	ENCFF346SQV	bed narrowPeak	conservative IDR thresholded peaks	https://www.encodeproject.org/files/ENCFF346SQV/@@download/ENCFF346SQV.bed.gz	HepG2
TBP	ENCFF002CUW	bed narrowPeak	optimal IDR thresholded peaks	https://www.encodeproject.org/files/ENCFF002CUW/@@download/ENCFF002CUW.bed.gz	HepG2
TBP	ENCFF584CNF	bed narrowPeak	optimal IDR thresholded peaks	https://www.encodeproject.org/files/ENCFF584CNF/@@download/ENCFF584CNF.bed.gz	HepG2
TBP	ENCFF425TFY	bed narrowPeak	conservative IDR thresholded peaks	https://www.encodeproject.org/files/ENCFF425TFY/@@download/ENCFF425TFY.bed.gz	HepG2
HDAC2	ENCFF002CKM	bed narrowPeak	optimal IDR thresholded peaks	https://www.encodeproject.org/files/ENCFF002CKM/@@download/ENCFF002CKM.bed.gz	HepG2
HDAC2	ENCFF138UQY	bed narrowPeak	conservative IDR thresholded peaks	https://www.encodeproject.org/files/ENCFF138UQY/@@download/ENCFF138UQY.bed.gz	HepG2
HDAC2	ENCFF459DRJ	bed narrowPeak	optimal IDR thresholded peaks	https://www.encodeproject.org/files/ENCFF459DRJ/@@download/ENCFF459DRJ.bed.gz	HepG2
SP1	ENCFF002CLB	bed narrowPeak	optimal IDR thresholded peaks	https://www.encodeproject.org/files/ENCFF002CLB/@@download/ENCFF002CLB.bed.gz	HepG2
SP1	ENCFF330CLZ	bed narrowPeak	conservative IDR thresholded peaks	https://www.encodeproject.org/files/ENCFF330CLZ/@@download/ENCFF330CLZ.bed.gz	HepG2
SP1	ENCFF741WKY	bed narrowPeak	optimal IDR thresholded peaks	https://www.encodeproject.org/files/ENCFF741WKY/@@download/ENCFF741WKY.bed.gz	HepG2
ZHX2	ENCFF974OIC	bed narrowPeak	optimal IDR thresholded peaks	https://www.encodeproject.org/files/ENCFF974OIC/@@download/ENCFF974OIC.bed.gz	HepG2
ZHX2	ENCFF918ZBN	bed narrowPeak	conservative IDR thresholded peaks	https://www.encodeproject.org/files/ENCFF918ZBN/@@download/ENCFF918ZBN.bed.gz	HepG2
REST	ENCFF002CKU	bed narrowPeak	optimal IDR thresholded peaks	https://www.encodeproject.org/files/ENCFF002CKU/@@download/ENCFF002CKU.bed.gz	HepG2
REST	ENCFF854KPC	bed narrowPeak	optimal IDR thresholded peaks	https://www.encodeproject.org/files/ENCFF854KPC/@@download/ENCFF854KPC.bed.gz	HepG2
REST	ENCFF618IBW	bed narrowPeak	conservative IDR thresholded peaks	https://www.encodeproject.org/files/ENCFF618IBW/@@download/ENCFF618IBW.bed.gz	HepG2
ZBTB7A	ENCFF002CLK	bed narrowPeak	optimal IDR thresholded peaks	https://www.encodeproject.org/files/ENCFF002CLK/@@download/ENCFF002CLK.bed.gz	HepG2
ZBTB7A	ENCFF264LQE	bed narrowPeak	optimal IDR thresholded peaks	https://www.encodeproject.org/files/ENCFF264LQE/@@download/ENCFF264LQE.bed.gz	HepG2
ZBTB7A	ENCFF363GGS	bed narrowPeak	conservative IDR thresholded peaks	https://www.encodeproject.org/files/ENCFF363GGS/@@download/ENCFF363GGS.bed.gz	HepG2
NBN	ENCFF138JAZ	bed narrowPeak	conservative IDR thresholded peaks	https://www.encodeproject.org/files/ENCFF138JAZ/@@download/ENCFF138JAZ.bed.gz	HepG2
NBN	ENCFF816GRJ	bed narrowPeak	optimal IDR thresholded peaks	https://www.encodeproject.org/files/ENCFF816GRJ/@@download/ENCFF816GRJ.bed.gz	HepG2
NBN	ENCFF117ZRT	bed narrowPeak	conservative IDR thresholded peaks	https://www.encodeproject.org/files/ENCFF117ZRT/@@download/ENCFF117ZRT.bed.gz	HepG2
NBN	ENCFF075PDC	bed narrowPeak	optimal IDR thresholded peaks	https://www.encodeproject.org/files/ENCFF075PDC/@@download/ENCFF075PDC.bed.gz	HepG2
ARID3A	ENCFF002CTS	bed narrowPeak	optimal IDR thresholded peaks	https://www.encodeproject.org/files/ENCFF002CTS/@@download/ENCFF002CTS.bed.gz	HepG2
ARID3A	ENCFF785LTB	bed narrowPeak	conservative IDR thresholded peaks	https://www.encodeproject.org/files/ENCFF785LTB/@@download/ENCFF785LTB.bed.gz	HepG2
ARID3A	ENCFF514OYL	bed narrowPeak	optimal IDR thresholded peaks	https://www.encodeproject.org/files/ENCFF514OYL/@@download/ENCFF514OYL.bed.gz	HepG2
ASH2L	ENCFF835XXH	bed narrowPeak	conservative IDR thresholded peaks	https://www.encodeproject.org/files/ENCFF835XXH/@@download/ENCFF835XXH.bed.gz	HepG2
ASH2L	ENCFF747VMG	bed narrowPeak	optimal IDR thresholded peaks	https://www.encodeproject.org/files/ENCFF747VMG/@@download/ENCFF747VMG.bed.gz	HepG2
CHD4	ENCFF346PKZ	bed narrowPeak	conservative IDR thresholded peaks	https://www.encodeproject.org/files/ENCFF346PKZ/@@download/ENCFF346PKZ.bed.gz	HepG2
CHD4	ENCFF069RNV	bed narrowPeak	optimal IDR thresholded peaks	https://www.encodeproject.org/files/ENCFF069RNV/@@download/ENCFF069RNV.bed.gz	HepG2
GATA4	ENCFF081YHC	bed narrowPeak	conservative IDR thresholded peaks	https://www.encodeproject.org/files/ENCFF081YHC/@@download/ENCFF081YHC.bed.gz	HepG2
GATA4	ENCFF210DMP	bed narrowPeak	optimal IDR thresholded peaks	https://www.encodeproject.org/files/ENCFF210DMP/@@download/ENCFF210DMP.bed.gz	HepG2
TEAD4	ENCFF002CLG	bed narrowPeak	optimal IDR thresholded peaks	https://www.encodeproject.org/files/ENCFF002CLG/@@download/ENCFF002CLG.bed.gz	HepG2
BRD4	ENCFF665CIR	bed narrowPeak	optimal IDR thresholded peaks	https://www.encodeproject.org/files/ENCFF665CIR/@@download/ENCFF665CIR.bed.gz	HepG2
BRD4	ENCFF367CAC	bed narrowPeak	conservative IDR thresholded peaks	https://www.encodeproject.org/files/ENCFF367CAC/@@download/ENCFF367CAC.bed.gz	HepG2
CTCF	ENCFF002DCX	bed narrowPeak	optimal IDR thresholded peaks	https://www.encodeproject.org/files/ENCFF002DCX/@@download/ENCFF002DCX.bed.gz	HepG2
SP1	ENCFF292SZD	bed narrowPeak	conservative IDR thresholded peaks	https://www.encodeproject.org/files/ENCFF292SZD/@@download/ENCFF292SZD.bed.gz	HepG2
SP1	ENCFF573ALP	bed narrowPeak	optimal IDR thresholded peaks	https://www.encodeproject.org/files/ENCFF573ALP/@@download/ENCFF573ALP.bed.gz	HepG2
CEBPB	ENCFF002CKD	bed narrowPeak	optimal IDR thresholded peaks	https://www.encodeproject.org/files/ENCFF002CKD/@@download/ENCFF002CKD.bed.gz	HepG2
CEBPB	ENCFF855DWX	bed narrowPeak	conservative IDR thresholded peaks	https://www.encodeproject.org/files/ENCFF855DWX/@@download/ENCFF855DWX.bed.gz	HepG2
CEBPB	ENCFF471HCD	bed narrowPeak	optimal IDR thresholded peaks	https://www.encodeproject.org/files/ENCFF471HCD/@@download/ENCFF471HCD.bed.gz	HepG2
FOXA1	ENCFF675TLS	bed narrowPeak	optimal IDR thresholded peaks	https://www.encodeproject.org/files/ENCFF675TLS/@@download/ENCFF675TLS.bed.gz	HepG2
FOXA1	ENCFF324OAJ	bed narrowPeak	conservative IDR thresholded peaks	https://www.encodeproject.org/files/ENCFF324OAJ/@@download/ENCFF324OAJ.bed.gz	HepG2
FOXP1	ENCFF501KPU	bed narrowPeak	optimal IDR thresholded peaks	https://www.encodeproject.org/files/ENCFF501KPU/@@download/ENCFF501KPU.bed.gz	HepG2
FOXP1	ENCFF304CJQ	bed narrowPeak	conservative IDR thresholded peaks	https://www.encodeproject.org/files/ENCFF304CJQ/@@download/ENCFF304CJQ.bed.gz	HepG2
NONO	ENCFF517JWG	bed narrowPeak	conservative IDR thresholded peaks	https://www.encodeproject.org/files/ENCFF517JWG/@@download/ENCFF517JWG.bed.gz	HepG2
NONO	ENCFF199GND	bed narrowPeak	optimal IDR thresholded peaks	https://www.encodeproject.org/files/ENCFF199GND/@@download/ENCFF199GND.bed.gz	HepG2
TRIM22	ENCFF985NVN	bed narrowPeak	conservative IDR thresholded peaks	https://www.encodeproject.org/files/ENCFF985NVN/@@download/ENCFF985NVN.bed.gz	HepG2
TRIM22	ENCFF623ALA	bed narrowPeak	optimal IDR thresholded peaks	https://www.encodeproject.org/files/ENCFF623ALA/@@download/ENCFF623ALA.bed.gz	HepG2
SUZ12	ENCFF086LMU	bed narrowPeak	optimal IDR thresholded peaks	https://www.encodeproject.org/files/ENCFF086LMU/@@download/ENCFF086LMU.bed.gz	HepG2
SUZ12	ENCFF602ZTI	bed narrowPeak	conservative IDR thresholded peaks	https://www.encodeproject.org/files/ENCFF602ZTI/@@download/ENCFF602ZTI.bed.gz	HepG2
SUZ12	ENCFF473GYY	bed narrowPeak	optimal IDR thresholded peaks	https://www.encodeproject.org/files/ENCFF473GYY/@@download/ENCFF473GYY.bed.gz	HepG2
SUZ12	ENCFF111RAM	bed narrowPeak	conservative IDR thresholded peaks	https://www.encodeproject.org/files/ENCFF111RAM/@@download/ENCFF111RAM.bed.gz	HepG2
RAD21	ENCFF002CKY	bed narrowPeak	optimal IDR thresholded peaks	https://www.encodeproject.org/files/ENCFF002CKY/@@download/ENCFF002CKY.bed.gz	HepG2
RAD21	ENCFF061QPF	bed narrowPeak	conservative IDR thresholded peaks	https://www.encodeproject.org/files/ENCFF061QPF/@@download/ENCFF061QPF.bed.gz	HepG2
RAD21	ENCFF072UEX	bed narrowPeak	optimal IDR thresholded peaks	https://www.encodeproject.org/files/ENCFF072UEX/@@download/ENCFF072UEX.bed.gz	HepG2
JUND	ENCFF002CKP	bed narrowPeak	optimal IDR thresholded peaks	https://www.encodeproject.org/files/ENCFF002CKP/@@download/ENCFF002CKP.bed.gz	HepG2
JUND	ENCFF971UIP	bed narrowPeak	conservative IDR thresholded peaks	https://www.encodeproject.org/files/ENCFF971UIP/@@download/ENCFF971UIP.bed.gz	HepG2
JUND	ENCFF721HUX	bed narrowPeak	optimal IDR thresholded peaks	https://www.encodeproject.org/files/ENCFF721HUX/@@download/ENCFF721HUX.bed.gz	HepG2
GABPA	ENCFF002CKL	bed narrowPeak	optimal IDR thresholded peaks	https://www.encodeproject.org/files/ENCFF002CKL/@@download/ENCFF002CKL.bed.gz	HepG2
GABPA	ENCFF383WAL	bed narrowPeak	conservative IDR thresholded peaks	https://www.encodeproject.org/files/ENCFF383WAL/@@download/ENCFF383WAL.bed.gz	HepG2
GABPA	ENCFF065EPE	bed narrowPeak	optimal IDR thresholded peaks	https://www.encodeproject.org/files/ENCFF065EPE/@@download/ENCFF065EPE.bed.gz	HepG2
REST	ENCFF002CKT	bed narrowPeak	optimal IDR thresholded peaks	https://www.encodeproject.org/files/ENCFF002CKT/@@download/ENCFF002CKT.bed.gz	HepG2
REST	ENCFF906TPA	bed narrowPeak	conservative IDR thresholded peaks	https://www.encodeproject.org/files/ENCFF906TPA/@@download/ENCFF906TPA.bed.gz	HepG2
REST	ENCFF153JLK	bed narrowPeak	optimal IDR thresholded peaks	https://www.encodeproject.org/files/ENCFF153JLK/@@download/ENCFF153JLK.bed.gz	HepG2
YY1	ENCFF002CLI	bed narrowPeak	optimal IDR thresholded peaks	https://www.encodeproject.org/files/ENCFF002CLI/@@download/ENCFF002CLI.bed.gz	HepG2
YY1	ENCFF858QVH	bed narrowPeak	conservative IDR thresholded peaks	https://www.encodeproject.org/files/ENCFF858QVH/@@download/ENCFF858QVH.bed.gz	HepG2
YY1	ENCFF420KEV	bed narrowPeak	optimal IDR thresholded peaks	https://www.encodeproject.org/files/ENCFF420KEV/@@download/ENCFF420KEV.bed.gz	HepG2
MBD4	ENCFF002CKQ	bed narrowPeak	optimal IDR thresholded peaks	https://www.encodeproject.org/files/ENCFF002CKQ/@@download/ENCFF002CKQ.bed.gz	HepG2
TAF1	ENCFF002CLE	bed narrowPeak	optimal IDR thresholded peaks	https://www.encodeproject.org/files/ENCFF002CLE/@@download/ENCFF002CLE.bed.gz	HepG2
TAF1	ENCFF575XQE	bed narrowPeak	conservative IDR thresholded peaks	https://www.encodeproject.org/files/ENCFF575XQE/@@download/ENCFF575XQE.bed.gz	HepG2
TAF1	ENCFF345GZF	bed narrowPeak	optimal IDR thresholded peaks	https://www.encodeproject.org/files/ENCFF345GZF/@@download/ENCFF345GZF.bed.gz	HepG2
SKI	ENCFF363QMG	bed narrowPeak	optimal IDR thresholded peaks	https://www.encodeproject.org/files/ENCFF363QMG/@@download/ENCFF363QMG.bed.gz	HepG2
SKI	ENCFF583YAO	bed narrowPeak	conservative IDR thresholded peaks	https://www.encodeproject.org/files/ENCFF583YAO/@@download/ENCFF583YAO.bed.gz	HepG2
SIN3B	ENCFF229MLS	bed narrowPeak	conservative IDR thresholded peaks	https://www.encodeproject.org/files/ENCFF229MLS/@@download/ENCFF229MLS.bed.gz	HepG2
SIN3B	ENCFF812UZP	bed narrowPeak	optimal IDR thresholded peaks	https://www.encodeproject.org/files/ENCFF812UZP/@@download/ENCFF812UZP.bed.gz	HepG2
SIN3B	ENCFF361WYB	bed narrowPeak	conservative IDR thresholded peaks	https://www.encodeproject.org/files/ENCFF361WYB/@@download/ENCFF361WYB.bed.gz	HepG2
SIN3B	ENCFF423RVT	bed narrowPeak	optimal IDR thresholded peaks	https://www.encodeproject.org/files/ENCFF423RVT/@@download/ENCFF423RVT.bed.gz	HepG2
FOXA1	ENCFF002CKI	bed narrowPeak	optimal IDR thresholded peaks	https://www.encodeproject.org/files/ENCFF002CKI/@@download/ENCFF002CKI.bed.gz	HepG2
FOXA1	ENCFF236SQL	bed narrowPeak	conservative IDR thresholded peaks	https://www.encodeproject.org/files/ENCFF236SQL/@@download/ENCFF236SQL.bed.gz	HepG2
FOXA1	ENCFF978IWS	bed narrowPeak	optimal IDR thresholded peaks	https://www.encodeproject.org/files/ENCFF978IWS/@@download/ENCFF978IWS.bed.gz	HepG2
TCF7	ENCFF164KYP	bed narrowPeak	conservative IDR thresholded peaks	https://www.encodeproject.org/files/ENCFF164KYP/@@download/ENCFF164KYP.bed.gz	HepG2
TCF7	ENCFF147MAN	bed narrowPeak	optimal IDR thresholded peaks	https://www.encodeproject.org/files/ENCFF147MAN/@@download/ENCFF147MAN.bed.gz	HepG2
TCF7	ENCFF255JSE	bed narrowPeak	conservative IDR thresholded peaks	https://www.encodeproject.org/files/ENCFF255JSE/@@download/ENCFF255JSE.bed.gz	HepG2
TCF7	ENCFF428XZH	bed narrowPeak	optimal IDR thresholded peaks	https://www.encodeproject.org/files/ENCFF428XZH/@@download/ENCFF428XZH.bed.gz	HepG2
PCBP1	ENCFF180HWU	bed narrowPeak	conservative IDR thresholded peaks	https://www.encodeproject.org/files/ENCFF180HWU/@@download/ENCFF180HWU.bed.gz	HepG2
PCBP1	ENCFF468MIF	bed narrowPeak	optimal IDR thresholded peaks	https://www.encodeproject.org/files/ENCFF468MIF/@@download/ENCFF468MIF.bed.gz	HepG2
U2AF2	ENCFF801SLM	bed narrowPeak	conservative IDR thresholded peaks	https://www.encodeproject.org/files/ENCFF801SLM/@@download/ENCFF801SLM.bed.gz	HepG2
U2AF2	ENCFF038QAU	bed narrowPeak	optimal IDR thresholded peaks	https://www.encodeproject.org/files/ENCFF038QAU/@@download/ENCFF038QAU.bed.gz	HepG2
FOXA2	ENCFF459HJZ	bed narrowPeak	conservative IDR thresholded peaks	https://www.encodeproject.org/files/ENCFF459HJZ/@@download/ENCFF459HJZ.bed.gz	HepG2
FOXA2	ENCFF683KBO	bed narrowPeak	optimal IDR thresholded peaks	https://www.encodeproject.org/files/ENCFF683KBO/@@download/ENCFF683KBO.bed.gz	HepG2
PTBP1	ENCFF908HDA	bed narrowPeak	optimal IDR thresholded peaks	https://www.encodeproject.org/files/ENCFF908HDA/@@download/ENCFF908HDA.bed.gz	HepG2
PTBP1	ENCFF623DYE	bed narrowPeak	conservative IDR thresholded peaks	https://www.encodeproject.org/files/ENCFF623DYE/@@download/ENCFF623DYE.bed.gz	HepG2
CCAR2	ENCFF478NLQ	bed narrowPeak	conservative IDR thresholded peaks	https://www.encodeproject.org/files/ENCFF478NLQ/@@download/ENCFF478NLQ.bed.gz	HepG2
CCAR2	ENCFF671IJY	bed narrowPeak	optimal IDR thresholded peaks	https://www.encodeproject.org/files/ENCFF671IJY/@@download/ENCFF671IJY.bed.gz	HepG2
FOXA1	ENCFF002CKJ	bed narrowPeak	optimal IDR thresholded peaks	https://www.encodeproject.org/files/ENCFF002CKJ/@@download/ENCFF002CKJ.bed.gz	HepG2
FOXA1	ENCFF722GFS	bed narrowPeak	conservative IDR thresholded peaks	https://www.encodeproject.org/files/ENCFF722GFS/@@download/ENCFF722GFS.bed.gz	HepG2
FOXA1	ENCFF553PWA	bed narrowPeak	optimal IDR thresholded peaks	https://www.encodeproject.org/files/ENCFF553PWA/@@download/ENCFF553PWA.bed.gz	HepG2
NRF1	ENCFF003GNY	bed narrowPeak	optimal IDR thresholded peaks	https://www.encodeproject.org/files/ENCFF003GNY/@@download/ENCFF003GNY.bed.gz	HepG2
NRF1	ENCFF920ITW	bed narrowPeak	conservative IDR thresholded peaks	https://www.encodeproject.org/files/ENCFF920ITW/@@download/ENCFF920ITW.bed.gz	HepG2
ZMYM3	ENCFF438HPL	bed narrowPeak	conservative IDR thresholded peaks	https://www.encodeproject.org/files/ENCFF438HPL/@@download/ENCFF438HPL.bed.gz	HepG2
ZMYM3	ENCFF177FZU	bed narrowPeak	optimal IDR thresholded peaks	https://www.encodeproject.org/files/ENCFF177FZU/@@download/ENCFF177FZU.bed.gz	HepG2
BRCA1	ENCFF002CTU	bed narrowPeak	optimal IDR thresholded peaks	https://www.encodeproject.org/files/ENCFF002CTU/@@download/ENCFF002CTU.bed.gz	HepG2
BRCA1	ENCFF775PPJ	bed narrowPeak	optimal IDR thresholded peaks	https://www.encodeproject.org/files/ENCFF775PPJ/@@download/ENCFF775PPJ.bed.gz	HepG2
BRCA1	ENCFF619ZLP	bed narrowPeak	conservative IDR thresholded peaks	https://www.encodeproject.org/files/ENCFF619ZLP/@@download/ENCFF619ZLP.bed.gz	HepG2
ATM	ENCFF465OFU	bed narrowPeak	conservative IDR thresholded peaks	https://www.encodeproject.org/files/ENCFF465OFU/@@download/ENCFF465OFU.bed.gz	HepG2
ATM	ENCFF950HDR	bed narrowPeak	optimal IDR thresholded peaks	https://www.encodeproject.org/files/ENCFF950HDR/@@download/ENCFF950HDR.bed.gz	HepG2
CREM	ENCFF569NVH	bed narrowPeak	conservative IDR thresholded peaks	https://www.encodeproject.org/files/ENCFF569NVH/@@download/ENCFF569NVH.bed.gz	HepG2
CREM	ENCFF693JHE	bed narrowPeak	optimal IDR thresholded peaks	https://www.encodeproject.org/files/ENCFF693JHE/@@download/ENCFF693JHE.bed.gz	HepG2
NFIC	ENCFF002CKS	bed narrowPeak	optimal IDR thresholded peaks	https://www.encodeproject.org/files/ENCFF002CKS/@@download/ENCFF002CKS.bed.gz	HepG2
MNT	ENCFF634BXB	bed narrowPeak	conservative IDR thresholded peaks	https://www.encodeproject.org/files/ENCFF634BXB/@@download/ENCFF634BXB.bed.gz	HepG2
MNT	ENCFF453CYS	bed narrowPeak	optimal IDR thresholded peaks	https://www.encodeproject.org/files/ENCFF453CYS/@@download/ENCFF453CYS.bed.gz	HepG2
MYBL2	ENCFF002CKR	bed narrowPeak	optimal IDR thresholded peaks	https://www.encodeproject.org/files/ENCFF002CKR/@@download/ENCFF002CKR.bed.gz	HepG2
CHD2	ENCFF002CTX	bed narrowPeak	optimal IDR thresholded peaks	https://www.encodeproject.org/files/ENCFF002CTX/@@download/ENCFF002CTX.bed.gz	HepG2
CHD2	ENCFF567BMG	bed narrowPeak	optimal IDR thresholded peaks	https://www.encodeproject.org/files/ENCFF567BMG/@@download/ENCFF567BMG.bed.gz	HepG2
CHD2	ENCFF553QDJ	bed narrowPeak	conservative IDR thresholded peaks	https://www.encodeproject.org/files/ENCFF553QDJ/@@download/ENCFF553QDJ.bed.gz	HepG2
POLR2A	ENCFF002DAY	bed narrowPeak	optimal IDR thresholded peaks	https://www.encodeproject.org/files/ENCFF002DAY/@@download/ENCFF002DAY.bed.gz	HepG2
CTCF	ENCFF002CDZ	bed narrowPeak	optimal IDR thresholded peaks	https://www.encodeproject.org/files/ENCFF002CDZ/@@download/ENCFF002CDZ.bed.gz	HepG2
ZBTB40	ENCFF598VEK	bed narrowPeak	optimal IDR thresholded peaks	https://www.encodeproject.org/files/ENCFF598VEK/@@download/ENCFF598VEK.bed.gz	HepG2
ZBTB40	ENCFF791BSP	bed narrowPeak	conservative IDR thresholded peaks	https://www.encodeproject.org/files/ENCFF791BSP/@@download/ENCFF791BSP.bed.gz	HepG2
FOXA2	ENCFF002CKK	bed narrowPeak	optimal IDR thresholded peaks	https://www.encodeproject.org/files/ENCFF002CKK/@@download/ENCFF002CKK.bed.gz	HepG2
FOXA2	ENCFF931IXE	bed narrowPeak	conservative IDR thresholded peaks	https://www.encodeproject.org/files/ENCFF931IXE/@@download/ENCFF931IXE.bed.gz	HepG2
FOXA2	ENCFF002ROJ	bed narrowPeak	optimal IDR thresholded peaks	https://www.encodeproject.org/files/ENCFF002ROJ/@@download/ENCFF002ROJ.bed.gz	HepG2
POLR2AphosphoS2	ENCFF002CUR	bed narrowPeak	optimal IDR thresholded peaks	https://www.encodeproject.org/files/ENCFF002CUR/@@download/ENCFF002CUR.bed.gz	HepG2
POLR2AphosphoS2	ENCFF783DEP	bed narrowPeak	conservative IDR thresholded peaks	https://www.encodeproject.org/files/ENCFF783DEP/@@download/ENCFF783DEP.bed.gz	HepG2
POLR2AphosphoS2	ENCFF648ZES	bed narrowPeak	optimal IDR thresholded peaks	https://www.encodeproject.org/files/ENCFF648ZES/@@download/ENCFF648ZES.bed.gz	HepG2
ZKSCAN1	ENCFF448GYO	bed narrowPeak	conservative IDR thresholded peaks	https://www.encodeproject.org/files/ENCFF448GYO/@@download/ENCFF448GYO.bed.gz	HepG2
ZKSCAN1	ENCFF614VFL	bed narrowPeak	optimal IDR thresholded peaks	https://www.encodeproject.org/files/ENCFF614VFL/@@download/ENCFF614VFL.bed.gz	HepG2
ZKSCAN1	ENCFF220KNX	bed narrowPeak	optimal IDR thresholded peaks	https://www.encodeproject.org/files/ENCFF220KNX/@@download/ENCFF220KNX.bed.gz	HepG2
ZKSCAN1	ENCFF927JRO	bed narrowPeak	conservative IDR thresholded peaks	https://www.encodeproject.org/files/ENCFF927JRO/@@download/ENCFF927JRO.bed.gz	HepG2
SRSF9	ENCFF868WXR	bed narrowPeak	optimal IDR thresholded peaks	https://www.encodeproject.org/files/ENCFF868WXR/@@download/ENCFF868WXR.bed.gz	HepG2
SRSF9	ENCFF284HXN	bed narrowPeak	conservative IDR thresholded peaks	https://www.encodeproject.org/files/ENCFF284HXN/@@download/ENCFF284HXN.bed.gz	HepG2
MAFK	ENCFF002CUH	bed narrowPeak	optimal IDR thresholded peaks	https://www.encodeproject.org/files/ENCFF002CUH/@@download/ENCFF002CUH.bed.gz	HepG2
MAFK	ENCFF814UDQ	bed narrowPeak	conservative IDR thresholded peaks	https://www.encodeproject.org/files/ENCFF814UDQ/@@download/ENCFF814UDQ.bed.gz	HepG2
MAFK	ENCFF718CQQ	bed narrowPeak	optimal IDR thresholded peaks	https://www.encodeproject.org/files/ENCFF718CQQ/@@download/ENCFF718CQQ.bed.gz	HepG2
IKZF1	ENCFF157FKT	bed narrowPeak	conservative IDR thresholded peaks	https://www.encodeproject.org/files/ENCFF157FKT/@@download/ENCFF157FKT.bed.gz	HepG2
IKZF1	ENCFF880SXP	bed narrowPeak	optimal IDR thresholded peaks	https://www.encodeproject.org/files/ENCFF880SXP/@@download/ENCFF880SXP.bed.gz	HepG2
FIP1L1	ENCFF093OUB	bed narrowPeak	optimal IDR thresholded peaks	https://www.encodeproject.org/files/ENCFF093OUB/@@download/ENCFF093OUB.bed.gz	HepG2
FIP1L1	ENCFF011DOP	bed narrowPeak	conservative IDR thresholded peaks	https://www.encodeproject.org/files/ENCFF011DOP/@@download/ENCFF011DOP.bed.gz	HepG2
SIN3A	ENCFF002CLA	bed narrowPeak	optimal IDR thresholded peaks	https://www.encodeproject.org/files/ENCFF002CLA/@@download/ENCFF002CLA.bed.gz	HepG2
SIN3A	ENCFF786HHN	bed narrowPeak	optimal IDR thresholded peaks	https://www.encodeproject.org/files/ENCFF786HHN/@@download/ENCFF786HHN.bed.gz	HepG2
SIN3A	ENCFF588MIJ	bed narrowPeak	conservative IDR thresholded peaks	https://www.encodeproject.org/files/ENCFF588MIJ/@@download/ENCFF588MIJ.bed.gz	HepG2
ELF1	ENCFF002CKG	bed narrowPeak	optimal IDR thresholded peaks	https://www.encodeproject.org/files/ENCFF002CKG/@@download/ENCFF002CKG.bed.gz	HepG2
ELF1	ENCFF786XDZ	bed narrowPeak	conservative IDR thresholded peaks	https://www.encodeproject.org/files/ENCFF786XDZ/@@download/ENCFF786XDZ.bed.gz	HepG2
ELF1	ENCFF747CHL	bed narrowPeak	optimal IDR thresholded peaks	https://www.encodeproject.org/files/ENCFF747CHL/@@download/ENCFF747CHL.bed.gz	HepG2
PCBP2	ENCFF460OWI	bed narrowPeak	optimal IDR thresholded peaks	https://www.encodeproject.org/files/ENCFF460OWI/@@download/ENCFF460OWI.bed.gz	HepG2
PCBP2	ENCFF882EOS	bed narrowPeak	conservative IDR thresholded peaks	https://www.encodeproject.org/files/ENCFF882EOS/@@download/ENCFF882EOS.bed.gz	HepG2
SRSF4	ENCFF479TZM	bed narrowPeak	optimal IDR thresholded peaks	https://www.encodeproject.org/files/ENCFF479TZM/@@download/ENCFF479TZM.bed.gz	HepG2
SRSF4	ENCFF083OZJ	bed narrowPeak	conservative IDR thresholded peaks	https://www.encodeproject.org/files/ENCFF083OZJ/@@download/ENCFF083OZJ.bed.gz	HepG2
HNRNPK	ENCFF899PGY	bed narrowPeak	conservative IDR thresholded peaks	https://www.encodeproject.org/files/ENCFF899PGY/@@download/ENCFF899PGY.bed.gz	HepG2
HNRNPK	ENCFF099BZU	bed narrowPeak	optimal IDR thresholded peaks	https://www.encodeproject.org/files/ENCFF099BZU/@@download/ENCFF099BZU.bed.gz	HepG2
ZNF384	ENCFF145TSQ	bed narrowPeak	conservative IDR thresholded peaks	https://www.encodeproject.org/files/ENCFF145TSQ/@@download/ENCFF145TSQ.bed.gz	HepG2
ZNF384	ENCFF324TBP	bed narrowPeak	optimal IDR thresholded peaks	https://www.encodeproject.org/files/ENCFF324TBP/@@download/ENCFF324TBP.bed.gz	HepG2
ZNF384	ENCFF667SBY	bed narrowPeak	optimal IDR thresholded peaks	https://www.encodeproject.org/files/ENCFF667SBY/@@download/ENCFF667SBY.bed.gz	HepG2
ZNF384	ENCFF492UQA	bed narrowPeak	conservative IDR thresholded peaks	https://www.encodeproject.org/files/ENCFF492UQA/@@download/ENCFF492UQA.bed.gz	HepG2
AGO2	ENCFF848FVO	bed narrowPeak	conservative IDR thresholded peaks	https://www.encodeproject.org/files/ENCFF848FVO/@@download/ENCFF848FVO.bed.gz	HepG2
AGO2	ENCFF622VSV	bed narrowPeak	optimal IDR thresholded peaks	https://www.encodeproject.org/files/ENCFF622VSV/@@download/ENCFF622VSV.bed.gz	HepG2
HCFC1	ENCFF125RMF	bed narrowPeak	conservative IDR thresholded peaks	https://www.encodeproject.org/files/ENCFF125RMF/@@download/ENCFF125RMF.bed.gz	HepG2
HCFC1	ENCFF997AAW	bed narrowPeak	optimal IDR thresholded peaks	https://www.encodeproject.org/files/ENCFF997AAW/@@download/ENCFF997AAW.bed.gz	HepG2
HCFC1	ENCFF294ZUH	bed narrowPeak	conservative IDR thresholded peaks	https://www.encodeproject.org/files/ENCFF294ZUH/@@download/ENCFF294ZUH.bed.gz	HepG2
HCFC1	ENCFF712YRN	bed narrowPeak	optimal IDR thresholded peaks	https://www.encodeproject.org/files/ENCFF712YRN/@@download/ENCFF712YRN.bed.gz	HepG2
NONO	ENCFF569XCA	bed narrowPeak	optimal IDR thresholded peaks	https://www.encodeproject.org/files/ENCFF569XCA/@@download/ENCFF569XCA.bed.gz	HepG2
NONO	ENCFF020MBK	bed narrowPeak	conservative IDR thresholded peaks	https://www.encodeproject.org/files/ENCFF020MBK/@@download/ENCFF020MBK.bed.gz	HepG2
MYC	ENCFF002DAW	bed narrowPeak	optimal IDR thresholded peaks	https://www.encodeproject.org/files/ENCFF002DAW/@@download/ENCFF002DAW.bed.gz	HepG2
TAF15	ENCFF490ZAU	bed narrowPeak	optimal IDR thresholded peaks	https://www.encodeproject.org/files/ENCFF490ZAU/@@download/ENCFF490ZAU.bed.gz	HepG2
SYNCRIP	ENCFF155OFK	bed narrowPeak	conservative IDR thresholded peaks	https://www.encodeproject.org/files/ENCFF155OFK/@@download/ENCFF155OFK.bed.gz	HepG2
SYNCRIP	ENCFF380TJT	bed narrowPeak	optimal IDR thresholded peaks	https://www.encodeproject.org/files/ENCFF380TJT/@@download/ENCFF380TJT.bed.gz	HepG2
U2AF1	ENCFF055MVR	bed narrowPeak	optimal IDR thresholded peaks	https://www.encodeproject.org/files/ENCFF055MVR/@@download/ENCFF055MVR.bed.gz	HepG2
U2AF1	ENCFF749HXW	bed narrowPeak	conservative IDR thresholded peaks	https://www.encodeproject.org/files/ENCFF749HXW/@@download/ENCFF749HXW.bed.gz	HepG2
PRPF4	ENCFF501NHW	bed narrowPeak	optimal IDR thresholded peaks	https://www.encodeproject.org/files/ENCFF501NHW/@@download/ENCFF501NHW.bed.gz	HepG2
PRPF4	ENCFF385HAD	bed narrowPeak	conservative IDR thresholded peaks	https://www.encodeproject.org/files/ENCFF385HAD/@@download/ENCFF385HAD.bed.gz	HepG2
MAFF	ENCFF002CUG	bed narrowPeak	optimal IDR thresholded peaks	https://www.encodeproject.org/files/ENCFF002CUG/@@download/ENCFF002CUG.bed.gz	HepG2
MAFF	ENCFF645NAR	bed narrowPeak	conservative IDR thresholded peaks	https://www.encodeproject.org/files/ENCFF645NAR/@@download/ENCFF645NAR.bed.gz	HepG2
MAFF	ENCFF684ASX	bed narrowPeak	optimal IDR thresholded peaks	https://www.encodeproject.org/files/ENCFF684ASX/@@download/ENCFF684ASX.bed.gz	HepG2
KDM1A	ENCFF439QHJ	bed narrowPeak	conservative IDR thresholded peaks	https://www.encodeproject.org/files/ENCFF439QHJ/@@download/ENCFF439QHJ.bed.gz	HepG2
KDM1A	ENCFF091JTI	bed narrowPeak	optimal IDR thresholded peaks	https://www.encodeproject.org/files/ENCFF091JTI/@@download/ENCFF091JTI.bed.gz	HepG2
CEBPA	ENCFF467TLM	bed narrowPeak	conservative IDR thresholded peaks	https://www.encodeproject.org/files/ENCFF467TLM/@@download/ENCFF467TLM.bed.gz	HepG2
CEBPA	ENCFF775MPD	bed narrowPeak	optimal IDR thresholded peaks	https://www.encodeproject.org/files/ENCFF775MPD/@@download/ENCFF775MPD.bed.gz	HepG2
HNF4A	ENCFF002CKN	bed narrowPeak	optimal IDR thresholded peaks	https://www.encodeproject.org/files/ENCFF002CKN/@@download/ENCFF002CKN.bed.gz	HepG2
HNF4A	ENCFF222YCT	bed narrowPeak	conservative IDR thresholded peaks	https://www.encodeproject.org/files/ENCFF222YCT/@@download/ENCFF222YCT.bed.gz	HepG2
HNF4A	ENCFF884JKW	bed narrowPeak	optimal IDR thresholded peaks	https://www.encodeproject.org/files/ENCFF884JKW/@@download/ENCFF884JKW.bed.gz	HepG2
ARID4B	ENCFF816BMB	bed narrowPeak	conservative IDR thresholded peaks	https://www.encodeproject.org/files/ENCFF816BMB/@@download/ENCFF816BMB.bed.gz	HepG2
ARID4B	ENCFF721YGQ	bed narrowPeak	optimal IDR thresholded peaks	https://www.encodeproject.org/files/ENCFF721YGQ/@@download/ENCFF721YGQ.bed.gz	HepG2
ZFP64	ENCFF413RSA	bed narrowPeak	conservative IDR thresholded peaks	https://www.encodeproject.org/files/ENCFF413RSA/@@download/ENCFF413RSA.bed.gz	HepG2
ZFP64	ENCFF070SCG	bed narrowPeak	optimal IDR thresholded peaks	https://www.encodeproject.org/files/ENCFF070SCG/@@download/ENCFF070SCG.bed.gz	HepG2
SAP130	ENCFF479UXX	bed narrowPeak	conservative IDR thresholded peaks	https://www.encodeproject.org/files/ENCFF479UXX/@@download/ENCFF479UXX.bed.gz	HepG2
SAP130	ENCFF474PQH	bed narrowPeak	optimal IDR thresholded peaks	https://www.encodeproject.org/files/ENCFF474PQH/@@download/ENCFF474PQH.bed.gz	HepG2
PBX2	ENCFF667PAI	bed narrowPeak	optimal IDR thresholded peaks	https://www.encodeproject.org/files/ENCFF667PAI/@@download/ENCFF667PAI.bed.gz	HepG2
PBX2	ENCFF038ZBJ	bed narrowPeak	conservative IDR thresholded peaks	https://www.encodeproject.org/files/ENCFF038ZBJ/@@download/ENCFF038ZBJ.bed.gz	HepG2
PHF5A	ENCFF864IUA	bed narrowPeak	pseudoreplicated IDR thresholded peaks	https://www.encodeproject.org/files/ENCFF864IUA/@@download/ENCFF864IUA.bed.gz	HepG2
KAT7	ENCFF541YFL	bed narrowPeak	conservative IDR thresholded peaks	https://www.encodeproject.org/files/ENCFF541YFL/@@download/ENCFF541YFL.bed.gz	HepG2
KAT7	ENCFF789WBV	bed narrowPeak	optimal IDR thresholded peaks	https://www.encodeproject.org/files/ENCFF789WBV/@@download/ENCFF789WBV.bed.gz	HepG2
MBD1	ENCFF837HCH	bed narrowPeak	optimal IDR thresholded peaks	https://www.encodeproject.org/files/ENCFF837HCH/@@download/ENCFF837HCH.bed.gz	HepG2
NRF1	ENCFF002CUM	bed narrowPeak	optimal IDR thresholded peaks	https://www.encodeproject.org/files/ENCFF002CUM/@@download/ENCFF002CUM.bed.gz	HepG2
NRF1	ENCFF317FBN	bed narrowPeak	conservative IDR thresholded peaks	https://www.encodeproject.org/files/ENCFF317FBN/@@download/ENCFF317FBN.bed.gz	HepG2
NRF1	ENCFF972NIR	bed narrowPeak	optimal IDR thresholded peaks	https://www.encodeproject.org/files/ENCFF972NIR/@@download/ENCFF972NIR.bed.gz	HepG2
CTCF	ENCFF002DAX	bed narrowPeak	optimal IDR thresholded peaks	https://www.encodeproject.org/files/ENCFF002DAX/@@download/ENCFF002DAX.bed.gz	HepG2
ATF3	ENCFF002CKB	bed narrowPeak	optimal IDR thresholded peaks	https://www.encodeproject.org/files/ENCFF002CKB/@@download/ENCFF002CKB.bed.gz	HepG2
ATF3	ENCFF015XMO	bed narrowPeak	conservative IDR thresholded peaks	https://www.encodeproject.org/files/ENCFF015XMO/@@download/ENCFF015XMO.bed.gz	HepG2
ATF3	ENCFF857YVK	bed narrowPeak	optimal IDR thresholded peaks	https://www.encodeproject.org/files/ENCFF857YVK/@@download/ENCFF857YVK.bed.gz	HepG2
USF1	ENCFF002CLH	bed narrowPeak	optimal IDR thresholded peaks	https://www.encodeproject.org/files/ENCFF002CLH/@@download/ENCFF002CLH.bed.gz	HepG2
USF1	ENCFF684BLN	bed narrowPeak	optimal IDR thresholded peaks	https://www.encodeproject.org/files/ENCFF684BLN/@@download/ENCFF684BLN.bed.gz	HepG2
USF1	ENCFF962DEO	bed narrowPeak	conservative IDR thresholded peaks	https://www.encodeproject.org/files/ENCFF962DEO/@@download/ENCFF962DEO.bed.gz	HepG2
ZBTB33	ENCFF002CLJ	bed narrowPeak	optimal IDR thresholded peaks	https://www.encodeproject.org/files/ENCFF002CLJ/@@download/ENCFF002CLJ.bed.gz	HepG2
FOXP1	ENCFF693ZGN	bed narrowPeak	optimal IDR thresholded peaks	https://www.encodeproject.org/files/ENCFF693ZGN/@@download/ENCFF693ZGN.bed.gz	HepG2
FOXP1	ENCFF888ZAZ	bed narrowPeak	conservative IDR thresholded peaks	https://www.encodeproject.org/files/ENCFF888ZAZ/@@download/ENCFF888ZAZ.bed.gz	HepG2
RFXANK	ENCFF460UKC	bed narrowPeak	conservative IDR thresholded peaks	https://www.encodeproject.org/files/ENCFF460UKC/@@download/ENCFF460UKC.bed.gz	HepG2
RFXANK	ENCFF984ULW	bed narrowPeak	optimal IDR thresholded peaks	https://www.encodeproject.org/files/ENCFF984ULW/@@download/ENCFF984ULW.bed.gz	HepG2
USF2	ENCFF002CUZ	bed narrowPeak	optimal IDR thresholded peaks	https://www.encodeproject.org/files/ENCFF002CUZ/@@download/ENCFF002CUZ.bed.gz	HepG2
HDAC1	ENCFF743SDK	bed narrowPeak	conservative IDR thresholded peaks	https://www.encodeproject.org/files/ENCFF743SDK/@@download/ENCFF743SDK.bed.gz	HepG2
HDAC1	ENCFF384XDG	bed narrowPeak	optimal IDR thresholded peaks	https://www.encodeproject.org/files/ENCFF384XDG/@@download/ENCFF384XDG.bed.gz	HepG2
ZGPAT	ENCFF061HCE	bed narrowPeak	optimal IDR thresholded peaks	https://www.encodeproject.org/files/ENCFF061HCE/@@download/ENCFF061HCE.bed.gz	HepG2
ZGPAT	ENCFF476MYE	bed narrowPeak	conservative IDR thresholded peaks	https://www.encodeproject.org/files/ENCFF476MYE/@@download/ENCFF476MYE.bed.gz	HepG2
ZBTB26	ENCFF938HSO	bed narrowPeak	conservative IDR thresholded peaks	https://www.encodeproject.org/files/ENCFF938HSO/@@download/ENCFF938HSO.bed.gz	HepG2
ZBTB26	ENCFF153JOG	bed narrowPeak	optimal IDR thresholded peaks	https://www.encodeproject.org/files/ENCFF153JOG/@@download/ENCFF153JOG.bed.gz	HepG2
RBPJ	ENCFF180BOV	bed narrowPeak	conservative IDR thresholded peaks	https://www.encodeproject.org/files/ENCFF180BOV/@@download/ENCFF180BOV.bed.gz	HepG2
RBPJ	ENCFF105IPJ	bed narrowPeak	optimal IDR thresholded peaks	https://www.encodeproject.org/files/ENCFF105IPJ/@@download/ENCFF105IPJ.bed.gz	HepG2
THAP11	ENCFF733OPI	bed narrowPeak	conservative IDR thresholded peaks	https://www.encodeproject.org/files/ENCFF733OPI/@@download/ENCFF733OPI.bed.gz	HepG2
THAP11	ENCFF072OVJ	bed narrowPeak	optimal IDR thresholded peaks	https://www.encodeproject.org/files/ENCFF072OVJ/@@download/ENCFF072OVJ.bed.gz	HepG2
ZKSCAN8	ENCFF214EZR	bed narrowPeak	conservative IDR thresholded peaks	https://www.encodeproject.org/files/ENCFF214EZR/@@download/ENCFF214EZR.bed.gz	HepG2
ZKSCAN8	ENCFF154KGC	bed narrowPeak	optimal IDR thresholded peaks	https://www.encodeproject.org/files/ENCFF154KGC/@@download/ENCFF154KGC.bed.gz	HepG2
NFYC	ENCFF895IBP	bed narrowPeak	conservative IDR thresholded peaks	https://www.encodeproject.org/files/ENCFF895IBP/@@download/ENCFF895IBP.bed.gz	HepG2
NFYC	ENCFF208YTG	bed narrowPeak	optimal IDR thresholded peaks	https://www.encodeproject.org/files/ENCFF208YTG/@@download/ENCFF208YTG.bed.gz	HepG2
RFX1	ENCFF507RHE	bed narrowPeak	optimal IDR thresholded peaks	https://www.encodeproject.org/files/ENCFF507RHE/@@download/ENCFF507RHE.bed.gz	HepG2
RFX1	ENCFF076BOS	bed narrowPeak	conservative IDR thresholded peaks	https://www.encodeproject.org/files/ENCFF076BOS/@@download/ENCFF076BOS.bed.gz	HepG2
LCORL	ENCFF308BSD	bed narrowPeak	optimal IDR thresholded peaks	https://www.encodeproject.org/files/ENCFF308BSD/@@download/ENCFF308BSD.bed.gz	HepG2
LCORL	ENCFF914THM	bed narrowPeak	conservative IDR thresholded peaks	https://www.encodeproject.org/files/ENCFF914THM/@@download/ENCFF914THM.bed.gz	HepG2
POLR2A	ENCFF002CKX	bed narrowPeak	optimal IDR thresholded peaks	https://www.encodeproject.org/files/ENCFF002CKX/@@download/ENCFF002CKX.bed.gz	HepG2
POLR2A	ENCFF116TSU	bed narrowPeak	conservative IDR thresholded peaks	https://www.encodeproject.org/files/ENCFF116TSU/@@download/ENCFF116TSU.bed.gz	HepG2
POLR2A	ENCFF992LSQ	bed narrowPeak	optimal IDR thresholded peaks	https://www.encodeproject.org/files/ENCFF992LSQ/@@download/ENCFF992LSQ.bed.gz	HepG2
KDM1A	ENCFF568WND	bed narrowPeak	conservative IDR thresholded peaks	https://www.encodeproject.org/files/ENCFF568WND/@@download/ENCFF568WND.bed.gz	HepG2
KDM1A	ENCFF613LYW	bed narrowPeak	optimal IDR thresholded peaks	https://www.encodeproject.org/files/ENCFF613LYW/@@download/ENCFF613LYW.bed.gz	HepG2
SP2	ENCFF002CLC	bed narrowPeak	optimal IDR thresholded peaks	https://www.encodeproject.org/files/ENCFF002CLC/@@download/ENCFF002CLC.bed.gz	HepG2
RNF2	ENCFF846ZLV	bed narrowPeak	conservative IDR thresholded peaks	https://www.encodeproject.org/files/ENCFF846ZLV/@@download/ENCFF846ZLV.bed.gz	HepG2
RNF2	ENCFF355ARZ	bed narrowPeak	optimal IDR thresholded peaks	https://www.encodeproject.org/files/ENCFF355ARZ/@@download/ENCFF355ARZ.bed.gz	HepG2
TFAP4	ENCFF263VIF	bed narrowPeak	conservative IDR thresholded peaks	https://www.encodeproject.org/files/ENCFF263VIF/@@download/ENCFF263VIF.bed.gz	HepG2
TFAP4	ENCFF712NYW	bed narrowPeak	optimal IDR thresholded peaks	https://www.encodeproject.org/files/ENCFF712NYW/@@download/ENCFF712NYW.bed.gz	HepG2
TFAP4	ENCFF890OUL	bed narrowPeak	conservative IDR thresholded peaks	https://www.encodeproject.org/files/ENCFF890OUL/@@download/ENCFF890OUL.bed.gz	HepG2
TFAP4	ENCFF184XYF	bed narrowPeak	optimal IDR thresholded peaks	https://www.encodeproject.org/files/ENCFF184XYF/@@download/ENCFF184XYF.bed.gz	HepG2
SOX13	ENCFF860FKS	bed narrowPeak	conservative IDR thresholded peaks	https://www.encodeproject.org/files/ENCFF860FKS/@@download/ENCFF860FKS.bed.gz	HepG2
SOX13	ENCFF132BFM	bed narrowPeak	optimal IDR thresholded peaks	https://www.encodeproject.org/files/ENCFF132BFM/@@download/ENCFF132BFM.bed.gz	HepG2
SOX13	ENCFF543UJL	bed narrowPeak	optimal IDR thresholded peaks	https://www.encodeproject.org/files/ENCFF543UJL/@@download/ENCFF543UJL.bed.gz	HepG2
SOX13	ENCFF870WOO	bed narrowPeak	conservative IDR thresholded peaks	https://www.encodeproject.org/files/ENCFF870WOO/@@download/ENCFF870WOO.bed.gz	HepG2
ZNF274	ENCFF002CVA	bed narrowPeak	optimal IDR thresholded peaks	https://www.encodeproject.org/files/ENCFF002CVA/@@download/ENCFF002CVA.bed.gz	HepG2
EP300	ENCFF002CUN	bed narrowPeak	optimal IDR thresholded peaks	https://www.encodeproject.org/files/ENCFF002CUN/@@download/ENCFF002CUN.bed.gz	HepG2
EP300	ENCFF259JWD	bed narrowPeak	optimal IDR thresholded peaks	https://www.encodeproject.org/files/ENCFF259JWD/@@download/ENCFF259JWD.bed.gz	HepG2
EP300	ENCFF054JWD	bed narrowPeak	conservative IDR thresholded peaks	https://www.encodeproject.org/files/ENCFF054JWD/@@download/ENCFF054JWD.bed.gz	HepG2
HDAC2	ENCFF768SFH	bed narrowPeak	conservative IDR thresholded peaks	https://www.encodeproject.org/files/ENCFF768SFH/@@download/ENCFF768SFH.bed.gz	HepG2
HDAC2	ENCFF503AZK	bed narrowPeak	optimal IDR thresholded peaks	https://www.encodeproject.org/files/ENCFF503AZK/@@download/ENCFF503AZK.bed.gz	HepG2
KDM5A	ENCFF243FMU	bed narrowPeak	conservative IDR thresholded peaks	https://www.encodeproject.org/files/ENCFF243FMU/@@download/ENCFF243FMU.bed.gz	HepG2
KDM5A	ENCFF880BTU	bed narrowPeak	optimal IDR thresholded peaks	https://www.encodeproject.org/files/ENCFF880BTU/@@download/ENCFF880BTU.bed.gz	HepG2
HBP1	ENCFF104YWL	bed narrowPeak	optimal IDR thresholded peaks	https://www.encodeproject.org/files/ENCFF104YWL/@@download/ENCFF104YWL.bed.gz	HepG2
HBP1	ENCFF682HTY	bed narrowPeak	conservative IDR thresholded peaks	https://www.encodeproject.org/files/ENCFF682HTY/@@download/ENCFF682HTY.bed.gz	HepG2
CEBPG	ENCFF996YOX	bed narrowPeak	conservative IDR thresholded peaks	https://www.encodeproject.org/files/ENCFF996YOX/@@download/ENCFF996YOX.bed.gz	HepG2
CEBPG	ENCFF215BXZ	bed narrowPeak	optimal IDR thresholded peaks	https://www.encodeproject.org/files/ENCFF215BXZ/@@download/ENCFF215BXZ.bed.gz	HepG2
RBM39	ENCFF221GWO	bed narrowPeak	optimal IDR thresholded peaks	https://www.encodeproject.org/files/ENCFF221GWO/@@download/ENCFF221GWO.bed.gz	HepG2
IRF2	ENCFF565FCW	bed narrowPeak	conservative IDR thresholded peaks	https://www.encodeproject.org/files/ENCFF565FCW/@@download/ENCFF565FCW.bed.gz	HepG2
IRF2	ENCFF239IZV	bed narrowPeak	optimal IDR thresholded peaks	https://www.encodeproject.org/files/ENCFF239IZV/@@download/ENCFF239IZV.bed.gz	HepG2
KAT8	ENCFF218XDR	bed narrowPeak	conservative IDR thresholded peaks	https://www.encodeproject.org/files/ENCFF218XDR/@@download/ENCFF218XDR.bed.gz	HepG2
KAT8	ENCFF537AFF	bed narrowPeak	optimal IDR thresholded peaks	https://www.encodeproject.org/files/ENCFF537AFF/@@download/ENCFF537AFF.bed.gz	HepG2
MYRF	ENCFF650LIT	bed narrowPeak	conservative IDR thresholded peaks	https://www.encodeproject.org/files/ENCFF650LIT/@@download/ENCFF650LIT.bed.gz	HepG2
MYRF	ENCFF804RUY	bed narrowPeak	optimal IDR thresholded peaks	https://www.encodeproject.org/files/ENCFF804RUY/@@download/ENCFF804RUY.bed.gz	HepG2
HMG20B	ENCFF010AHT	bed narrowPeak	optimal IDR thresholded peaks	https://www.encodeproject.org/files/ENCFF010AHT/@@download/ENCFF010AHT.bed.gz	HepG2
GABPB1	ENCFF067WFG	bed narrowPeak	conservative IDR thresholded peaks	https://www.encodeproject.org/files/ENCFF067WFG/@@download/ENCFF067WFG.bed.gz	HepG2
GABPB1	ENCFF476ZWO	bed narrowPeak	optimal IDR thresholded peaks	https://www.encodeproject.org/files/ENCFF476ZWO/@@download/ENCFF476ZWO.bed.gz	HepG2
IRF3	ENCFF002CUE	bed narrowPeak	optimal IDR thresholded peaks	https://www.encodeproject.org/files/ENCFF002CUE/@@download/ENCFF002CUE.bed.gz	HepG2
HDAC6	ENCFF964PGC	bed narrowPeak	conservative IDR thresholded peaks	https://www.encodeproject.org/files/ENCFF964PGC/@@download/ENCFF964PGC.bed.gz	HepG2
HDAC6	ENCFF847HDW	bed narrowPeak	optimal IDR thresholded peaks	https://www.encodeproject.org/files/ENCFF847HDW/@@download/ENCFF847HDW.bed.gz	HepG2
KDM6A	ENCFF460FQG	bed narrowPeak	conservative IDR thresholded peaks	https://www.encodeproject.org/files/ENCFF460FQG/@@download/ENCFF460FQG.bed.gz	HepG2
KDM6A	ENCFF570QVI	bed narrowPeak	optimal IDR thresholded peaks	https://www.encodeproject.org/files/ENCFF570QVI/@@download/ENCFF570QVI.bed.gz	HepG2
MXD3	ENCFF007VXQ	bed narrowPeak	conservative IDR thresholded peaks	https://www.encodeproject.org/files/ENCFF007VXQ/@@download/ENCFF007VXQ.bed.gz	HepG2
MXD3	ENCFF202AQO	bed narrowPeak	optimal IDR thresholded peaks	https://www.encodeproject.org/files/ENCFF202AQO/@@download/ENCFF202AQO.bed.gz	HepG2
NR2F1	ENCFF284GRM	bed narrowPeak	conservative IDR thresholded peaks	https://www.encodeproject.org/files/ENCFF284GRM/@@download/ENCFF284GRM.bed.gz	HepG2
NR2F1	ENCFF622VPB	bed narrowPeak	optimal IDR thresholded peaks	https://www.encodeproject.org/files/ENCFF622VPB/@@download/ENCFF622VPB.bed.gz	HepG2
RCOR2	ENCFF139ZSW	bed narrowPeak	conservative IDR thresholded peaks	https://www.encodeproject.org/files/ENCFF139ZSW/@@download/ENCFF139ZSW.bed.gz	HepG2
RCOR2	ENCFF659XDO	bed narrowPeak	optimal IDR thresholded peaks	https://www.encodeproject.org/files/ENCFF659XDO/@@download/ENCFF659XDO.bed.gz	HepG2
ZNF644	ENCFF228XGU	bed narrowPeak	optimal IDR thresholded peaks	https://www.encodeproject.org/files/ENCFF228XGU/@@download/ENCFF228XGU.bed.gz	HepG2
ZNF644	ENCFF213GUJ	bed narrowPeak	conservative IDR thresholded peaks	https://www.encodeproject.org/files/ENCFF213GUJ/@@download/ENCFF213GUJ.bed.gz	HepG2
KLF9	ENCFF002UCF	bed narrowPeak	conservative IDR thresholded peaks	https://www.encodeproject.org/files/ENCFF002UCF/@@download/ENCFF002UCF.bed.gz	HepG2
KLF9	ENCFF368VEQ	bed narrowPeak	optimal IDR thresholded peaks	https://www.encodeproject.org/files/ENCFF368VEQ/@@download/ENCFF368VEQ.bed.gz	HepG2
MIER3	ENCFF762ERZ	bed narrowPeak	conservative IDR thresholded peaks	https://www.encodeproject.org/files/ENCFF762ERZ/@@download/ENCFF762ERZ.bed.gz	HepG2
MIER3	ENCFF476VFJ	bed narrowPeak	optimal IDR thresholded peaks	https://www.encodeproject.org/files/ENCFF476VFJ/@@download/ENCFF476VFJ.bed.gz	HepG2
TEAD1	ENCFF810LYT	bed narrowPeak	conservative IDR thresholded peaks	https://www.encodeproject.org/files/ENCFF810LYT/@@download/ENCFF810LYT.bed.gz	HepG2
TEAD1	ENCFF364KSB	bed narrowPeak	optimal IDR thresholded peaks	https://www.encodeproject.org/files/ENCFF364KSB/@@download/ENCFF364KSB.bed.gz	HepG2
ZNF24	ENCFF990DMH	bed narrowPeak	conservative IDR thresholded peaks	https://www.encodeproject.org/files/ENCFF990DMH/@@download/ENCFF990DMH.bed.gz	HepG2
ZNF24	ENCFF539NTA	bed narrowPeak	optimal IDR thresholded peaks	https://www.encodeproject.org/files/ENCFF539NTA/@@download/ENCFF539NTA.bed.gz	HepG2
HMG20A	ENCFF187TBY	bed narrowPeak	conservative IDR thresholded peaks	https://www.encodeproject.org/files/ENCFF187TBY/@@download/ENCFF187TBY.bed.gz	HepG2
HMG20A	ENCFF298ZJA	bed narrowPeak	optimal IDR thresholded peaks	https://www.encodeproject.org/files/ENCFF298ZJA/@@download/ENCFF298ZJA.bed.gz	HepG2
RBM22	ENCFF688VHI	bed narrowPeak	optimal IDR thresholded peaks	https://www.encodeproject.org/files/ENCFF688VHI/@@download/ENCFF688VHI.bed.gz	HepG2
ZNF48	ENCFF888YXK	bed narrowPeak	conservative IDR thresholded peaks	https://www.encodeproject.org/files/ENCFF888YXK/@@download/ENCFF888YXK.bed.gz	HepG2
ZNF48	ENCFF302MOY	bed narrowPeak	optimal IDR thresholded peaks	https://www.encodeproject.org/files/ENCFF302MOY/@@download/ENCFF302MOY.bed.gz	HepG2
RXRB	ENCFF907PFI	bed narrowPeak	conservative IDR thresholded peaks	https://www.encodeproject.org/files/ENCFF907PFI/@@download/ENCFF907PFI.bed.gz	HepG2
RXRB	ENCFF017BKY	bed narrowPeak	optimal IDR thresholded peaks	https://www.encodeproject.org/files/ENCFF017BKY/@@download/ENCFF017BKY.bed.gz	HepG2
DRAP1	ENCFF979PKG	bed narrowPeak	conservative IDR thresholded peaks	https://www.encodeproject.org/files/ENCFF979PKG/@@download/ENCFF979PKG.bed.gz	HepG2
DRAP1	ENCFF482JUM	bed narrowPeak	optimal IDR thresholded peaks	https://www.encodeproject.org/files/ENCFF482JUM/@@download/ENCFF482JUM.bed.gz	HepG2
RAD51	ENCFF353OUV	bed narrowPeak	conservative IDR thresholded peaks	https://www.encodeproject.org/files/ENCFF353OUV/@@download/ENCFF353OUV.bed.gz	HepG2
RAD51	ENCFF681NJT	bed narrowPeak	optimal IDR thresholded peaks	https://www.encodeproject.org/files/ENCFF681NJT/@@download/ENCFF681NJT.bed.gz	HepG2
TBX3	ENCFF018ZCT	bed narrowPeak	conservative IDR thresholded peaks	https://www.encodeproject.org/files/ENCFF018ZCT/@@download/ENCFF018ZCT.bed.gz	HepG2
TBX3	ENCFF807BXT	bed narrowPeak	optimal IDR thresholded peaks	https://www.encodeproject.org/files/ENCFF807BXT/@@download/ENCFF807BXT.bed.gz	HepG2
TBX3	ENCFF852LYH	bed narrowPeak	conservative IDR thresholded peaks	https://www.encodeproject.org/files/ENCFF852LYH/@@download/ENCFF852LYH.bed.gz	HepG2
TBX3	ENCFF574YMJ	bed narrowPeak	optimal IDR thresholded peaks	https://www.encodeproject.org/files/ENCFF574YMJ/@@download/ENCFF574YMJ.bed.gz	HepG2
PHB2	ENCFF085ENX	bed narrowPeak	conservative IDR thresholded peaks	https://www.encodeproject.org/files/ENCFF085ENX/@@download/ENCFF085ENX.bed.gz	HepG2
PHB2	ENCFF449ITJ	bed narrowPeak	optimal IDR thresholded peaks	https://www.encodeproject.org/files/ENCFF449ITJ/@@download/ENCFF449ITJ.bed.gz	HepG2
PHF8	ENCFF327PCB	bed narrowPeak	conservative IDR thresholded peaks	https://www.encodeproject.org/files/ENCFF327PCB/@@download/ENCFF327PCB.bed.gz	HepG2
PHF8	ENCFF060MLS	bed narrowPeak	optimal IDR thresholded peaks	https://www.encodeproject.org/files/ENCFF060MLS/@@download/ENCFF060MLS.bed.gz	HepG2
CTCF	ENCFF002CKF	bed narrowPeak	optimal IDR thresholded peaks	https://www.encodeproject.org/files/ENCFF002CKF/@@download/ENCFF002CKF.bed.gz	HepG2
CTCF	ENCFF329MOF	bed narrowPeak	conservative IDR thresholded peaks	https://www.encodeproject.org/files/ENCFF329MOF/@@download/ENCFF329MOF.bed.gz	HepG2
CTCF	ENCFF237OKO	bed narrowPeak	optimal IDR thresholded peaks	https://www.encodeproject.org/files/ENCFF237OKO/@@download/ENCFF237OKO.bed.gz	HepG2
FOXK2	ENCFF851TZY	bed narrowPeak	conservative IDR thresholded peaks	https://www.encodeproject.org/files/ENCFF851TZY/@@download/ENCFF851TZY.bed.gz	HepG2
FOXK2	ENCFF144FQA	bed narrowPeak	optimal IDR thresholded peaks	https://www.encodeproject.org/files/ENCFF144FQA/@@download/ENCFF144FQA.bed.gz	HepG2
KLF6	ENCFF175VJE	bed narrowPeak	optimal IDR thresholded peaks	https://www.encodeproject.org/files/ENCFF175VJE/@@download/ENCFF175VJE.bed.gz	HepG2
GATAD2A	ENCFF159FOJ	bed narrowPeak	conservative IDR thresholded peaks	https://www.encodeproject.org/files/ENCFF159FOJ/@@download/ENCFF159FOJ.bed.gz	HepG2
GATAD2A	ENCFF334ADP	bed narrowPeak	optimal IDR thresholded peaks	https://www.encodeproject.org/files/ENCFF334ADP/@@download/ENCFF334ADP.bed.gz	HepG2
SP5	ENCFF536MIH	bed narrowPeak	conservative IDR thresholded peaks	https://www.encodeproject.org/files/ENCFF536MIH/@@download/ENCFF536MIH.bed.gz	HepG2
SP5	ENCFF444QQD	bed narrowPeak	optimal IDR thresholded peaks	https://www.encodeproject.org/files/ENCFF444QQD/@@download/ENCFF444QQD.bed.gz	HepG2
KMT2B	ENCFF359TDD	bed narrowPeak	conservative IDR thresholded peaks	https://www.encodeproject.org/files/ENCFF359TDD/@@download/ENCFF359TDD.bed.gz	HepG2
KMT2B	ENCFF901MRX	bed narrowPeak	optimal IDR thresholded peaks	https://www.encodeproject.org/files/ENCFF901MRX/@@download/ENCFF901MRX.bed.gz	HepG2
KDM3A	ENCFF049VMN	bed narrowPeak	conservative IDR thresholded peaks	https://www.encodeproject.org/files/ENCFF049VMN/@@download/ENCFF049VMN.bed.gz	HepG2
KDM3A	ENCFF615ZNL	bed narrowPeak	optimal IDR thresholded peaks	https://www.encodeproject.org/files/ENCFF615ZNL/@@download/ENCFF615ZNL.bed.gz	HepG2
ZNF3	ENCFF609WOU	bed narrowPeak	optimal IDR thresholded peaks	https://www.encodeproject.org/files/ENCFF609WOU/@@download/ENCFF609WOU.bed.gz	HepG2
ZNF3	ENCFF815VNN	bed narrowPeak	conservative IDR thresholded peaks	https://www.encodeproject.org/files/ENCFF815VNN/@@download/ENCFF815VNN.bed.gz	HepG2
TFDP1	ENCFF934CSS	bed narrowPeak	conservative IDR thresholded peaks	https://www.encodeproject.org/files/ENCFF934CSS/@@download/ENCFF934CSS.bed.gz	HepG2
TFDP1	ENCFF049ZOP	bed narrowPeak	optimal IDR thresholded peaks	https://www.encodeproject.org/files/ENCFF049ZOP/@@download/ENCFF049ZOP.bed.gz	HepG2
ZNF7	ENCFF578QAA	bed narrowPeak	conservative IDR thresholded peaks	https://www.encodeproject.org/files/ENCFF578QAA/@@download/ENCFF578QAA.bed.gz	HepG2
ZNF7	ENCFF448CFQ	bed narrowPeak	optimal IDR thresholded peaks	https://www.encodeproject.org/files/ENCFF448CFQ/@@download/ENCFF448CFQ.bed.gz	HepG2
MIXL1	ENCFF525IST	bed narrowPeak	optimal IDR thresholded peaks	https://www.encodeproject.org/files/ENCFF525IST/@@download/ENCFF525IST.bed.gz	HepG2
MIXL1	ENCFF465ZTH	bed narrowPeak	conservative IDR thresholded peaks	https://www.encodeproject.org/files/ENCFF465ZTH/@@download/ENCFF465ZTH.bed.gz	HepG2
ETV5	ENCFF860ZQP	bed narrowPeak	conservative IDR thresholded peaks	https://www.encodeproject.org/files/ENCFF860ZQP/@@download/ENCFF860ZQP.bed.gz	HepG2
ETV5	ENCFF864YJE	bed narrowPeak	optimal IDR thresholded peaks	https://www.encodeproject.org/files/ENCFF864YJE/@@download/ENCFF864YJE.bed.gz	HepG2
MIER2	ENCFF567QOI	bed narrowPeak	conservative IDR thresholded peaks	https://www.encodeproject.org/files/ENCFF567QOI/@@download/ENCFF567QOI.bed.gz	HepG2
MIER2	ENCFF303DEY	bed narrowPeak	optimal IDR thresholded peaks	https://www.encodeproject.org/files/ENCFF303DEY/@@download/ENCFF303DEY.bed.gz	HepG2
GABPA	ENCFF571PSU	bed narrowPeak	conservative IDR thresholded peaks	https://www.encodeproject.org/files/ENCFF571PSU/@@download/ENCFF571PSU.bed.gz	HepG2
GABPA	ENCFF450SOG	bed narrowPeak	optimal IDR thresholded peaks	https://www.encodeproject.org/files/ENCFF450SOG/@@download/ENCFF450SOG.bed.gz	HepG2
ZSCAN9	ENCFF522MMC	bed narrowPeak	conservative IDR thresholded peaks	https://www.encodeproject.org/files/ENCFF522MMC/@@download/ENCFF522MMC.bed.gz	HepG2
ZSCAN9	ENCFF579BTD	bed narrowPeak	optimal IDR thresholded peaks	https://www.encodeproject.org/files/ENCFF579BTD/@@download/ENCFF579BTD.bed.gz	HepG2
SMAD4	ENCFF003NDR	bed narrowPeak	conservative IDR thresholded peaks	https://www.encodeproject.org/files/ENCFF003NDR/@@download/ENCFF003NDR.bed.gz	HepG2
SMAD4	ENCFF281OPX	bed narrowPeak	optimal IDR thresholded peaks	https://www.encodeproject.org/files/ENCFF281OPX/@@download/ENCFF281OPX.bed.gz	HepG2
SSRP1	ENCFF936VXH	bed narrowPeak	conservative IDR thresholded peaks	https://www.encodeproject.org/files/ENCFF936VXH/@@download/ENCFF936VXH.bed.gz	HepG2
SSRP1	ENCFF068FYV	bed narrowPeak	optimal IDR thresholded peaks	https://www.encodeproject.org/files/ENCFF068FYV/@@download/ENCFF068FYV.bed.gz	HepG2
ZNF205	ENCFF802CPZ	bed narrowPeak	optimal IDR thresholded peaks	https://www.encodeproject.org/files/ENCFF802CPZ/@@download/ENCFF802CPZ.bed.gz	HepG2
HHEX	ENCFF786OZJ	bed narrowPeak	conservative IDR thresholded peaks	https://www.encodeproject.org/files/ENCFF786OZJ/@@download/ENCFF786OZJ.bed.gz	HepG2
HHEX	ENCFF930DKI	bed narrowPeak	optimal IDR thresholded peaks	https://www.encodeproject.org/files/ENCFF930DKI/@@download/ENCFF930DKI.bed.gz	HepG2
GMEB2	ENCFF153OUQ	bed narrowPeak	conservative IDR thresholded peaks	https://www.encodeproject.org/files/ENCFF153OUQ/@@download/ENCFF153OUQ.bed.gz	HepG2
GMEB2	ENCFF998RMR	bed narrowPeak	optimal IDR thresholded peaks	https://www.encodeproject.org/files/ENCFF998RMR/@@download/ENCFF998RMR.bed.gz	HepG2
DMAP1	ENCFF191YSA	bed narrowPeak	optimal IDR thresholded peaks	https://www.encodeproject.org/files/ENCFF191YSA/@@download/ENCFF191YSA.bed.gz	HepG2
DMAP1	ENCFF455MVM	bed narrowPeak	conservative IDR thresholded peaks	https://www.encodeproject.org/files/ENCFF455MVM/@@download/ENCFF455MVM.bed.gz	HepG2
HLF	ENCFF624SFC	bed narrowPeak	optimal IDR thresholded peaks	https://www.encodeproject.org/files/ENCFF624SFC/@@download/ENCFF624SFC.bed.gz	HepG2
HLF	ENCFF421ZII	bed narrowPeak	conservative IDR thresholded peaks	https://www.encodeproject.org/files/ENCFF421ZII/@@download/ENCFF421ZII.bed.gz	HepG2
ZNF614	ENCFF733OUW	bed narrowPeak	conservative IDR thresholded peaks	https://www.encodeproject.org/files/ENCFF733OUW/@@download/ENCFF733OUW.bed.gz	HepG2
ZNF614	ENCFF944IVP	bed narrowPeak	optimal IDR thresholded peaks	https://www.encodeproject.org/files/ENCFF944IVP/@@download/ENCFF944IVP.bed.gz	HepG2
NR2F6	ENCFF594VQM	bed narrowPeak	conservative IDR thresholded peaks	https://www.encodeproject.org/files/ENCFF594VQM/@@download/ENCFF594VQM.bed.gz	HepG2
NR2F6	ENCFF615JCW	bed narrowPeak	optimal IDR thresholded peaks	https://www.encodeproject.org/files/ENCFF615JCW/@@download/ENCFF615JCW.bed.gz	HepG2
FOXA3	ENCFF804FBI	bed narrowPeak	conservative IDR thresholded peaks	https://www.encodeproject.org/files/ENCFF804FBI/@@download/ENCFF804FBI.bed.gz	HepG2
FOXA3	ENCFF984AJU	bed narrowPeak	optimal IDR thresholded peaks	https://www.encodeproject.org/files/ENCFF984AJU/@@download/ENCFF984AJU.bed.gz	HepG2
MXD4	ENCFF275GXO	bed narrowPeak	optimal IDR thresholded peaks	https://www.encodeproject.org/files/ENCFF275GXO/@@download/ENCFF275GXO.bed.gz	HepG2
MXD4	ENCFF064SUV	bed narrowPeak	conservative IDR thresholded peaks	https://www.encodeproject.org/files/ENCFF064SUV/@@download/ENCFF064SUV.bed.gz	HepG2
PPARG	ENCFF322FWU	bed narrowPeak	optimal IDR thresholded peaks	https://www.encodeproject.org/files/ENCFF322FWU/@@download/ENCFF322FWU.bed.gz	HepG2
IKZF5	ENCFF716MKU	bed narrowPeak	optimal IDR thresholded peaks	https://www.encodeproject.org/files/ENCFF716MKU/@@download/ENCFF716MKU.bed.gz	HepG2
IKZF5	ENCFF736WQJ	bed narrowPeak	conservative IDR thresholded peaks	https://www.encodeproject.org/files/ENCFF736WQJ/@@download/ENCFF736WQJ.bed.gz	HepG2
RFX3	ENCFF859UHG	bed narrowPeak	conservative IDR thresholded peaks	https://www.encodeproject.org/files/ENCFF859UHG/@@download/ENCFF859UHG.bed.gz	HepG2
RFX3	ENCFF552URL	bed narrowPeak	optimal IDR thresholded peaks	https://www.encodeproject.org/files/ENCFF552URL/@@download/ENCFF552URL.bed.gz	HepG2
NFIA	ENCFF249FDQ	bed narrowPeak	conservative IDR thresholded peaks	https://www.encodeproject.org/files/ENCFF249FDQ/@@download/ENCFF249FDQ.bed.gz	HepG2
NFIA	ENCFF718ERC	bed narrowPeak	optimal IDR thresholded peaks	https://www.encodeproject.org/files/ENCFF718ERC/@@download/ENCFF718ERC.bed.gz	HepG2
ZNF792	ENCFF507VVT	bed narrowPeak	conservative IDR thresholded peaks	https://www.encodeproject.org/files/ENCFF507VVT/@@download/ENCFF507VVT.bed.gz	HepG2
ZNF792	ENCFF937PFR	bed narrowPeak	optimal IDR thresholded peaks	https://www.encodeproject.org/files/ENCFF937PFR/@@download/ENCFF937PFR.bed.gz	HepG2
MLX	ENCFF754RXP	bed narrowPeak	conservative IDR thresholded peaks	https://www.encodeproject.org/files/ENCFF754RXP/@@download/ENCFF754RXP.bed.gz	HepG2
MLX	ENCFF522XCQ	bed narrowPeak	optimal IDR thresholded peaks	https://www.encodeproject.org/files/ENCFF522XCQ/@@download/ENCFF522XCQ.bed.gz	HepG2
NFKBIZ	ENCFF035YMH	bed narrowPeak	conservative IDR thresholded peaks	https://www.encodeproject.org/files/ENCFF035YMH/@@download/ENCFF035YMH.bed.gz	HepG2
NFKBIZ	ENCFF336YRU	bed narrowPeak	optimal IDR thresholded peaks	https://www.encodeproject.org/files/ENCFF336YRU/@@download/ENCFF336YRU.bed.gz	HepG2
ZBTB25	ENCFF992MSA	bed narrowPeak	conservative IDR thresholded peaks	https://www.encodeproject.org/files/ENCFF992MSA/@@download/ENCFF992MSA.bed.gz	HepG2
ZBTB25	ENCFF362WUO	bed narrowPeak	optimal IDR thresholded peaks	https://www.encodeproject.org/files/ENCFF362WUO/@@download/ENCFF362WUO.bed.gz	HepG2
THRB	ENCFF016NAS	bed narrowPeak	conservative IDR thresholded peaks	https://www.encodeproject.org/files/ENCFF016NAS/@@download/ENCFF016NAS.bed.gz	HepG2
THRB	ENCFF192DTE	bed narrowPeak	optimal IDR thresholded peaks	https://www.encodeproject.org/files/ENCFF192DTE/@@download/ENCFF192DTE.bed.gz	HepG2
ZNF580	ENCFF168TDM	bed narrowPeak	conservative IDR thresholded peaks	https://www.encodeproject.org/files/ENCFF168TDM/@@download/ENCFF168TDM.bed.gz	HepG2
ZNF580	ENCFF516QUQ	bed narrowPeak	optimal IDR thresholded peaks	https://www.encodeproject.org/files/ENCFF516QUQ/@@download/ENCFF516QUQ.bed.gz	HepG2
ZNF511	ENCFF390OIH	bed narrowPeak	optimal IDR thresholded peaks	https://www.encodeproject.org/files/ENCFF390OIH/@@download/ENCFF390OIH.bed.gz	HepG2
MBD1	ENCFF801SSE	bed narrowPeak	optimal IDR thresholded peaks	https://www.encodeproject.org/files/ENCFF801SSE/@@download/ENCFF801SSE.bed.gz	HepG2
PAF1	ENCFF423DWX	bed narrowPeak	conservative IDR thresholded peaks	https://www.encodeproject.org/files/ENCFF423DWX/@@download/ENCFF423DWX.bed.gz	HepG2
PAF1	ENCFF834UDQ	bed narrowPeak	optimal IDR thresholded peaks	https://www.encodeproject.org/files/ENCFF834UDQ/@@download/ENCFF834UDQ.bed.gz	HepG2
TEAD3	ENCFF138XKG	bed narrowPeak	conservative IDR thresholded peaks	https://www.encodeproject.org/files/ENCFF138XKG/@@download/ENCFF138XKG.bed.gz	HepG2
TEAD3	ENCFF079MKQ	bed narrowPeak	optimal IDR thresholded peaks	https://www.encodeproject.org/files/ENCFF079MKQ/@@download/ENCFF079MKQ.bed.gz	HepG2
GATAD1	ENCFF269FJF	bed narrowPeak	conservative IDR thresholded peaks	https://www.encodeproject.org/files/ENCFF269FJF/@@download/ENCFF269FJF.bed.gz	HepG2
GATAD1	ENCFF707UDV	bed narrowPeak	optimal IDR thresholded peaks	https://www.encodeproject.org/files/ENCFF707UDV/@@download/ENCFF707UDV.bed.gz	HepG2
NFIL3	ENCFF833TMD	bed narrowPeak	optimal IDR thresholded peaks	https://www.encodeproject.org/files/ENCFF833TMD/@@download/ENCFF833TMD.bed.gz	HepG2
NFIL3	ENCFF773PSQ	bed narrowPeak	conservative IDR thresholded peaks	https://www.encodeproject.org/files/ENCFF773PSQ/@@download/ENCFF773PSQ.bed.gz	HepG2
TGIF2	ENCFF037KBA	bed narrowPeak	optimal IDR thresholded peaks	https://www.encodeproject.org/files/ENCFF037KBA/@@download/ENCFF037KBA.bed.gz	HepG2
TGIF2	ENCFF834ACA	bed narrowPeak	conservative IDR thresholded peaks	https://www.encodeproject.org/files/ENCFF834ACA/@@download/ENCFF834ACA.bed.gz	HepG2
SOX13	ENCFF344NKG	bed narrowPeak	optimal IDR thresholded peaks	https://www.encodeproject.org/files/ENCFF344NKG/@@download/ENCFF344NKG.bed.gz	HepG2
SOX13	ENCFF315DYP	bed narrowPeak	conservative IDR thresholded peaks	https://www.encodeproject.org/files/ENCFF315DYP/@@download/ENCFF315DYP.bed.gz	HepG2
DNMT3B	ENCFF176KMF	bed narrowPeak	optimal IDR thresholded peaks	https://www.encodeproject.org/files/ENCFF176KMF/@@download/ENCFF176KMF.bed.gz	HepG2
DNMT3B	ENCFF586DWB	bed narrowPeak	conservative IDR thresholded peaks	https://www.encodeproject.org/files/ENCFF586DWB/@@download/ENCFF586DWB.bed.gz	HepG2
POLR2AphosphoS5	ENCFF002CKW	bed narrowPeak	optimal IDR thresholded peaks	https://www.encodeproject.org/files/ENCFF002CKW/@@download/ENCFF002CKW.bed.gz	HepG2
POLR2AphosphoS5	ENCFF061EOS	bed narrowPeak	optimal IDR thresholded peaks	https://www.encodeproject.org/files/ENCFF061EOS/@@download/ENCFF061EOS.bed.gz	HepG2
POLR2AphosphoS5	ENCFF979IOQ	bed narrowPeak	conservative IDR thresholded peaks	https://www.encodeproject.org/files/ENCFF979IOQ/@@download/ENCFF979IOQ.bed.gz	HepG2
PHF8	ENCFF756JCJ	bed narrowPeak	optimal IDR thresholded peaks	https://www.encodeproject.org/files/ENCFF756JCJ/@@download/ENCFF756JCJ.bed.gz	HepG2
PHF8	ENCFF002NRP	bed narrowPeak	conservative IDR thresholded peaks	https://www.encodeproject.org/files/ENCFF002NRP/@@download/ENCFF002NRP.bed.gz	HepG2

## Sheet: S1D
K562
Encode_Accession	File_Accession
ENCSR000AEL	ENCFF782PCD
ENCSR000AEL	ENCFF902SEE
ENCSR885DVH	ENCFF286GLL
ENCSR885DVH	ENCFF986DBN
ENCSR000AEN	ENCFF534SDC
ENCSR000AEN	ENCFF450IVD
ENCSR109IQO	ENCFF139IXQ
ENCSR109IQO	ENCFF088RDE
HepG2
ENCSR561FEE	ENCFF972FHG
ENCSR561FEE	ENCFF502WZU
ENCSR985KAT	ENCFF139ZPW
ENCSR985KAT	ENCFF255HPM
ENCSR985KAT	ENCFF569YCC
ENCSR329MHM	ENCFF649AHO
ENCSR329MHM	ENCFF974MUO
ENCSR000CPE	ENCFF814SRY
ENCSR000CPE	ENCFF309AYC
